# Supplementary material for: Highly chemoselective ligands for Suzuki–Miyaura cross-coupling reaction based on virtual ligand-assisted screening
Source: Royal Society of Chemistry journal article supplement (doi:10.1039/d3ob00398a), 2023-01-01
Supplement: d3ob00398a1.pdf [file d3ob00398a1.pdf]

## Electronic Supplementally Information

### Highly Chemoselective Ligands for Suzuki–Miyaura Cross-Coupling Reaction Based on Virtual Ligand-Assisted Screening

Wataru Matsuoka,<sup>\*ab</sup> Yu Harabuchi,<sup>abc</sup> Yuuya Nagata,<sup>bc</sup> and Satoshi Maeda<sup>\*abcd</sup>

<sup>a</sup>*Department of Chemistry, Faculty of Science, Hokkaido University, Sapporo, Hokkaido 060-0810, Japan.*

<sup>b</sup>*ERATO Maeda Artificial Intelligence for Chemical Reaction Design and Discovery Project, Hokkaido University, Sapporo, Hokkaido 060-0810, Japan.*

<sup>c</sup>*Institute for Chemical Reaction Design and Discovery (WPI-ICReDD), Hokkaido University, Sapporo, Hokkaido 001-0021, Japan.*

<sup>d</sup>*Research and Services Division of Materials Data and Integrated System (MaDIS), National Institute for Materials Science (NIMS), Tsukuba, Ibaraki 305-0044, Japan.*

e-mail addresses: matsuoka.wataru@sci.hokudai.ac.jp (W.Matsuoka),  
smaeda@eis.hokudai.ac.jp (S.Maeda)

#### Table of Contents

1. Computational details
  - 1.1 General
  - 1.2 Procedure for the VLA screening
2. Experimental details
  - 2.1 General
  - 2.2 Experimental procedure
  - 2.3 Experimental results
3. List of calculated ligands and their parameters
  - 3.1 Calculated TEP and cone angle
  - 3.2 Predicted values of  $\Delta\Delta G^\ddagger$
4. Sampling of ligand–ligand interactions
  - 4.1 Procedure and results
  - 4.2 Discussion
5. Implementation and performance of modified virtual ligands
  - 5.1 General
  - 5.2 Implementation of keep potential
  - 5.3 Implementation of **VL1**
  - 5.4 Performance of **VL1**
  - 5.5 Implementation of **VL2<sub>PR3</sub>** and **VL2<sub>PAr3</sub>**
  - 5.6 Performance of **VL2<sub>PR3</sub>** and **VL2<sub>PAr3</sub>**
6. Supplemental references
7. GC spectra

## 1. Computational details

### 1.1 General

All energy and gradient calculations at the density functional theory (DFT) level were performed using the Gaussian 16<sup>S1</sup> software. Calculations at the GFN-xTB1 level were performed using the ORCA 4.2.0 software.<sup>S2</sup> Geometry optimization and automated reaction path searches using the single-component artificial force induced reaction (SC-AFIR) method were conducted in the developer version of the GRRM software<sup>S3</sup>. The Gibbs free energy values were estimated assuming a harmonic vibrational model, where all harmonic frequencies below 50 cm<sup>-1</sup> were set to 50 cm<sup>-1</sup>, as suggested in the literature.<sup>S4</sup> It is well known that gas-phase calculations overestimate the translational and rotational entropies of a molecule in solution because the solute molecule is surrounded by solvent molecules, which limits its translational and rotational motion. This can lead to significant errors in the Gibbs free energy when comparing systems with different numbers of molecules. Therefore, we applied the empirical correction method suggested by Martin *et al.*<sup>S5</sup>. Specifically, a correction of 4.3 kcal/mol was added to the Gibbs free energy of a system consisting of  $n+1$  molecules when compared to a system consisting of  $n$  molecules, as described in the literature.<sup>S5,S6</sup>

The TEP values and cone angles of **L1–L62** were determined as follows. First, the conformational isomers of LNi(CO)<sub>3</sub>, where L represents the corresponding ligand, were systematically explored using the SC-AFIR method<sup>S3</sup> at the GFN1-xTB level.<sup>S7</sup> All obtained conformers were then re-optimized in vacuo at the  $\omega$ B97X-D/def2-SVP level with the “Grid=FineGrid” option, and harmonic vibrational frequency analyses were performed at the same computational level. Using the optimized LNi(CO)<sub>3</sub> structures, the cone angle of each conformer was calculated geometrically based on the definition.<sup>S8</sup> The TEP value was determined as the frequency of the (pseudo)symmetrical C–O vibrational mode, which was determined by the harmonic vibrational frequency analysis.<sup>S9</sup> Representative values of the cone angle and the TEP were calculated based on the obtained cone angles, TEP values, and relative Gibbs free energies for all conformers, as shown in Tables S2 and S3.

The TEP values and cone angles of **K1–K18** were determined as follows. The initial structures of LNi(CO)<sub>3</sub> were prepared based on the Cartesian coordinates of all accessible conformers for each ligand obtained from *kraken*.<sup>S10</sup> Geometry optimizations of these initial structures and subsequent harmonic vibrational frequency analyses were then performed in vacuo at the  $\omega$ B97X-D/def2-SVP level using the “Grid=FineGrid” option. Using the optimized LNi(CO)<sub>3</sub> structures, the cone angle of each conformer was calculated geometrically based on the definition.<sup>S8</sup> The TEP value was determined as the frequency of the (pseudo)symmetrical C–O vibrational mode, which was determined by the harmonic vibrational frequency analysis.<sup>S9</sup> Representative values of the cone angle and the TEP were calculated based on the obtained cone angles, TEP values, and relative Gibbs free energies for all conformers, as shown in Table S4.

## 1.2 Procedure for the VLA screening

The VLA screening calculations were performed in the following four steps: (1) automated reaction path search using the SC-AFIR method with **VL1**, (2) path refinement calculations using the locally updated planes (LUP) method with **VL1**, (3) transition state (TS) optimizations using **VL2** and (4) parameter screening using **VL2**.

### STEP 1: The automated reaction path search using the SC-AFIR method with VL1

The reaction path network for the oxidative addition of compound **1** to the Pd complex Pd(**VL1**)<sub>2</sub> (Fig. 3b) was obtained as follows: Automated reaction path searches using the SC-AFIR method were performed using the B3LYP functional, the LanL2DZ basis set with an effective core potential (ECP) for Pd, the 6-31G(d) basis set for S, and the 6-31G basis set for other atoms with the “Grid=FineGrid” option. The search was initiated using one of the stable geometries of compound **1** and Pd(**VL1**)<sub>2</sub>. The target atoms for the SC-AFIR method were set as the Pd atom, the P atoms in the virtual ligands, and the C, O, and Cl atoms involved in the reaction. The model collision energy parameter ( $\gamma$ ), which defines the strength of the artificial force, was set to 300 kJ/mol. In addition, weak forces ( $\gamma = 100/N C_2$ , where  $N$  is the number of atoms) were applied between each pair of atoms to prevent the molecules from being too far apart. The electronic and steric parameters of **VL1** were set to reproduce those of PPh<sub>3</sub> (Table S7). All obtained AFIR paths were re-optimized using the LUP method.<sup>S11</sup> All reaction path searches were guided by a kinetic-based navigation method, where the obtained equilibrium structures (EQs) were evaluated based on the so-called traffic volume determined by the rate constant matrix contraction (RCMC) method,<sup>S12</sup> and the EQ to which the next SC-AFIR procedure was applied was chosen, as detailed previously.<sup>S13</sup> Kinetic analyses were performed based on the Gibbs free energies and the LUP path network. In this kinetic-based navigation, an initial population of one was assigned to the initial structure. The highest traffic volume among those obtained at the three reaction temperatures (200, 300, and 400 K) was regarded as the traffic volume for each EQ. The reaction time was set to 3600 s (1 h). Based on this kinetic navigation, the SC-AFIR procedure was applied only to EQs in which the bond connectivity of compound **1** remains unchanged to effectively explore the oxidative addition paths of compound **1**. The searches were terminated when 1000 effective AFIR paths were computed.

### STEP 2: Path refinement calculations using the LUP method with VL1

All paths extracted from the reaction path network based on the criteria described in the manuscript (Fig. 3b and related discussions) were refined using the LUP method<sup>S11</sup> at the  $\omega$ B97X-D/def2-SVP level and the “Grid=FineGrid” option. To consider the solvent effects, the implicit solvation SMD model<sup>S14</sup> (THF) was applied (hereafter, this computational level is denoted as *CLI*). Like the automated reaction path search calculation, the parameters of **VL1** were set to reproduce those of PPh<sub>3</sub> (Table S7).

### STEP 3: TS optimizations using VL2

The geometry optimizations of **PT1–PT12** (Fig. 3b of the manuscript) were performed using **VL2**. The entire paths which include these PTs (obtained in Step 2) were further refined using the LUP method at the same computational level (*CLI*), employing **VL2<sub>PAR3</sub>** rather than **VL1**. The parameters of **VL2<sub>PAR3</sub>** were set to match those of PPh<sub>3</sub> ( $r_0 = 1.657 \text{ \AA}$  for the keep potential and  $\theta = 165^\circ$  for the cone potential). Following that, we performed the geometry optimizations of the transition states

at *CLI*, starting from the refined PTs and using the same virtual ligand. For the geometry optimizations of monoligated species (PTs corresponding to **PT4–PT6** and **PT10–PT12**), a virtual ligand that was not coordinated to the Pd atom was removed beforehand.

#### STEP 4: Parameter screening using VL2

Geometry optimization of **TSCO-PdL1**, **TSCO-PdL2**, **TSCCI-PdL1**, and **TSCCI-PdL2** (Fig. 3b of the manuscript) was performed using **VL2<sub>PAR3</sub>** or **VL2<sub>PR3</sub>** with 90 combinations of electronic and steric parameters ( $r_0 = 1.3, 1.4, 1.5, 1.6, 1.7, 1.8, 1.9, 2.0$  or  $2.1$  Å for the keep potential, and  $\theta = 120, 130, 140, 150, 160, 170, 180, 190, 200$  or  $210^\circ$  for the cone potential) at the computational level *CLI*. Specifically, using the optimized structures for these TSs obtained in Step3 (**VL2<sub>PAR3</sub>**,  $r_0 = 1.657$  Å, and  $\theta = 165^\circ$ ) as the initial structures, we performed geometry optimizations of the TSs with virtual ligand(s) (**VL2<sub>PAR3</sub>** or **VL2<sub>PR3</sub>**) with each combination of parameters. In certain cases, the calculation did not converge to the desired TS structure due to an inappropriate initial structure. In such cases, the corresponding TS structure was obtained by performing geometry optimization from the TS structure obtained using the same virtual ligand with the closest combination of parameters (arrows in Fig. S1). In addition, certain calculations of bis-ligated species (**TSCO-PdL2** and **TSCCI-PdL2**) with bulky virtual ligands (mainly  $\theta = 200$  and  $210^\circ$ ) did not result in the desired TS structure due to the dissociation of the virtual ligand. These TSs were considered to be energetically unfavorable compared to the corresponding monoligated species (**TSCO-PdL1** and **TSCCI-PdL1** with the same parameters of the virtual ligands). The results of the parameter screening are summarized in Fig. S1. In these plots, each cross indicates the geometry optimization of the corresponding TS with the corresponding parameters of the virtual ligand successfully converged.

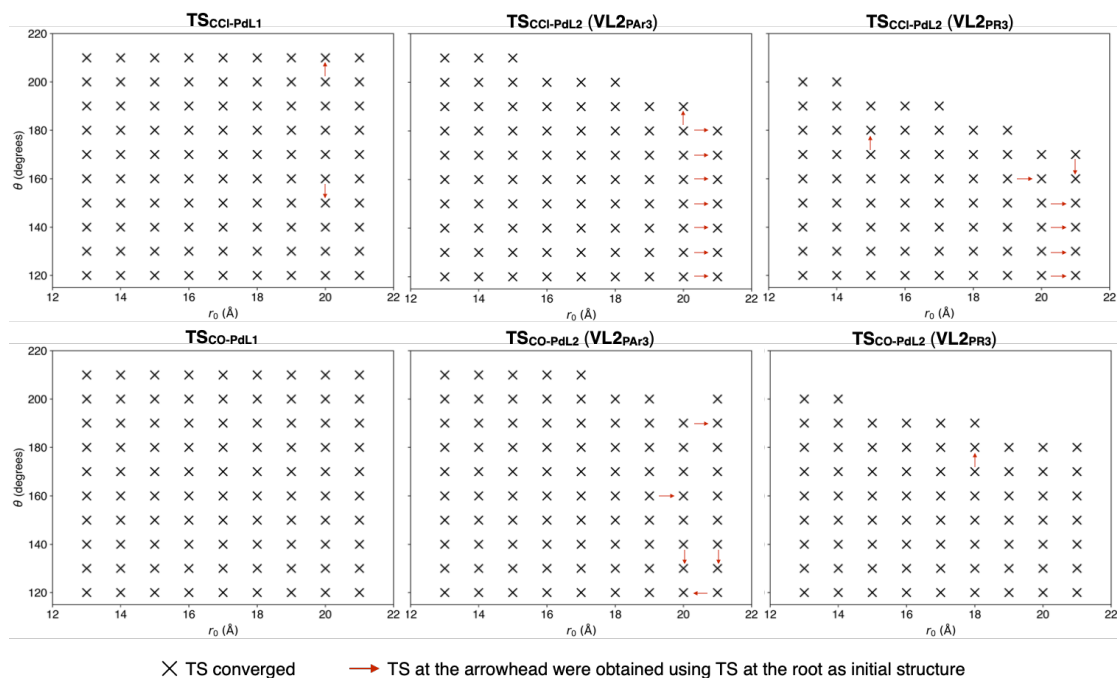

**Fig. S1.** Summary of the parameter screening.

## 2. Experimental details

### 2.1 General

Unless otherwise stated, all reactants and reagents, including dry solvents, were obtained from commercial suppliers and used as received. Pd<sub>2</sub>(dba)<sub>3</sub>, **L39**, **L40**, **L47–L50**, **L53**, and **L60–L62** were purchased from Sigma-Aldrich. 2-Methylphenyl boronic acid, potassium fluoride, **L33–L38**, **L41–L46**, **L51**, **L52**, and **L54–L59** were purchased from Tokyo Chemical Industry Co. Ltd. Tetrahydrofuran was purchased from Kanto Chemical Co., Inc. 4-Chlorophenyl triflate,<sup>S15</sup> **K9**,<sup>S16</sup> and **K14**<sup>S17</sup> were synthesized according to a previously reported procedure. Unless otherwise stated, all reactions were carried out in dry solvents under an atmosphere of N<sub>2</sub> or Ar gases in dried glassware, using standard vacuum-line techniques. Unless otherwise stated, all workup and purification procedures were performed using reagent-grade solvents in the air. Gas chromatography (GC) analysis was conducted using a Shimadzu GC-2025 instrument equipped with a DB-1 column (15 m × 0.320 mm, Agilent), with dodecane as an internal standard. All reactions were carried out using a Chemspeed SWING robotic platform with an iSynth reactor containing 48 individual reactors.

### 2.2 Experimental procedure

#### General procedure for chemoselective SMC reaction with **L33–L62** (Fig. 5)

Pd<sub>2</sub>(dba)<sub>3</sub> (6.2 mg, 6.74 μmol, 1.5 mol%) and 2-methylphenyl boronic acid (61.2 mg, 0.45 mmol, 1.0 equiv) were added to an 8-mL vial, which was set in the iSynth reactor on the Chemspeed platform. The vial was then evacuated and refilled with Ar gas three times. The vial was opened under a flow of Ar gas and a THF solution (0.45 mL) containing 4-chlorophenyl triflate (72.9 μL, 0.45 mmol, 1.0 equiv) and dodecane (18 μL, internal standard for GC analysis) was added. Then, a 0.03 M THF solution of ligand (0.45 mL, 0.0135 mmol, 3.0 mol%) was added to the vial, and the vial was closed. The mixture was stirred for 30 min at room temperature, and the vial was opened under Ar gas flow. A 1.5 M degassed aqueous solution of KF (0.90 mL, 1.35 mmol, 3.0 equiv) was added to the vial and the vial was closed. The mixture was then stirred for 12 h at 70 °C. Following that, the mixture was cooled to room temperature and THF was removed under reduced pressure at 40 °C. CH<sub>2</sub>Cl<sub>2</sub> (4.5 mL) was added to the vial and the resulting mixture was stirred for 5 min. A small amount of the organic phase (about 1.0 mL) was collected from this mixture and passed through a short pad of silica gel (eluent: ethyl acetate). The resulting solution was analyzed by GC without further purification.

#### General procedure for chemoselective SMC reaction with **K9** or **K14** (Fig. 6c)

To a J. Young Schlenk tube containing a magnetic stirring bar, Pd<sub>2</sub>(dba)<sub>3</sub> (6.2 mg, 6.74 μmol, 1.5 mol%), 2-methylphenyl boronic acid (61.2 mg, 0.45 mmol, 1.0 equiv), and **K9** (5.9 mg, 0.0135 mmol, 3.0 mol%) or **K14** (3.3 mg, 0.0135 mmol, 3.0 mol%) were added. The tube was then evacuated and refilled with N<sub>2</sub> gas three times. THF (0.90 mL) and 4-chlorophenyl triflate (72.9 μL, 0.45 mmol, 1.0 equiv) were added to the tube under the flow of N<sub>2</sub> gas. The tube was sealed with a cap, and the mixture was stirred for 30 min at room temperature. The tube was then opened under the flow of N<sub>2</sub> gas, and a 1.5 M degassed aqueous solution of KF (0.90 mL, 1.35 mmol, 3.0 equiv) was added. The tube was sealed with a cap, and the mixture was stirred for 12 h at 70 °C. The mixture was cooled to room temperature and diluted with CH<sub>2</sub>Cl<sub>2</sub> (about 5 mL). Dodecane (18 μL,

internal standard for GC analysis) was added to the mixture, and the resulting mixture was vigorously stirred. A small amount of the organic phase (about 100  $\mu\text{L}$ ) was collected from this mixture and passed through a short pad of silica gel (eluent: ethyl acetate). The resulting solution was analyzed by GC without further purification.

## 2.3 Experimental results

The experimental results obtained for **L33–L62**, **K9** and **K14** are summarized in Table S1. For all ligands, the experiments were repeated twice, and the averaged values of  $\Delta\Delta G^\ddagger$  were used in the discussion.

**Table S1.** Experimental results for **L33–L62**, **K10** and **K14**.

| Ligand     | Run 1     |                                      | Run 2     |                                      | Average           |                                      |
|------------|-----------|--------------------------------------|-----------|--------------------------------------|-------------------|--------------------------------------|
|            | Yield (%) | $\Delta\Delta G^\ddagger$ (kcal/mol) | Yield (%) | $\Delta\Delta G^\ddagger$ (kcal/mol) | Yield (%)         | $\Delta\Delta G^\ddagger$ (kcal/mol) |
| <b>L33</b> | 0.14      | -                                    | 0.09      | -                                    | 0.12              | -                                    |
| <b>L34</b> | N.D.      | -                                    | 0.03      | -                                    | 0.03              | -                                    |
| <b>L35</b> | 20.39     | 3.47                                 | 5.79      | 2.59                                 | 13.09             | 3.03                                 |
| <b>L36</b> | 58.18     | 4.24                                 | 59.67     | 4.19                                 | 58.93             | 4.21                                 |
| <b>L37</b> | 1.21      | -0.10                                | 2.38      | 0.28                                 | 1.79              | 0.09                                 |
| <b>L38</b> | 0.37      | -                                    | 0.35      | -                                    | 0.36              | -                                    |
| <b>L39</b> | 68.65     | 4.05                                 | 65.98     | 4.04                                 | 67.32             | 4.05                                 |
| <b>L40</b> | 36.32     | 4.94                                 | 35.09     | 4.02                                 | 35.70             | 4.48                                 |
| <b>L41</b> | 2.51      | 1.35                                 | 2.47      | 1.35                                 | 2.49              | 1.35                                 |
| <b>L42</b> | 35.97     | 3.27                                 | 43.67     | 3.60                                 | 39.82             | 3.43                                 |
| <b>L43</b> | 14.88     | 2.96                                 | 31.54     | 3.62                                 | 23.21             | 3.29                                 |
| <b>L44</b> | 0.79      | -                                    | 0.88      | -                                    | 0.84              | -                                    |
| <b>L45</b> | 19.92     | 3.59                                 | 17.47     | 3.55                                 | 18.69             | 3.57                                 |
| <b>L46</b> | 0.65      | -                                    | 0.56      | -                                    | 0.60              | -                                    |
| <b>L47</b> | 58.39     | 4.29                                 | 60.60     | 4.30                                 | 59.50             | 4.30                                 |
| <b>L48</b> | 34.11     | 3.79                                 | 27.35     | 3.65                                 | 30.73             | 3.72                                 |
| <b>L49</b> | 38.61     | 3.82                                 | 33.20     | 3.76                                 | 35.91             | 3.79                                 |
| <b>L50</b> | 0.75      | -                                    | 0.89      | -                                    | 0.82              | -                                    |
| <b>L51</b> | 66.54     | 4.52                                 | 69.69     | 4.43                                 | 68.11             | 4.48                                 |
| <b>L52</b> | 0.91      | -                                    | 0.86      | -                                    | 0.89              | -                                    |
| <b>L53</b> | 0.55      | -                                    | 0.49      | -                                    | 0.52              | -                                    |
| <b>L54</b> | 3.56      | 1.90                                 | 2.80      | 1.91                                 | 3.18              | 1.91                                 |
| <b>L55</b> | 11.34     | 3.05                                 | 6.58      | 2.75                                 | 8.96              | 2.90                                 |
| <b>L56</b> | 8.76      | 2.58                                 | 4.55      | 2.36                                 | 6.66              | 2.47                                 |
| <b>L57</b> | 2.19      | 1.83                                 | N.D.      | -                                    | 2.19 <sup>a</sup> | 1.83 <sup>a</sup>                    |
| <b>L58</b> | 9.77      | 3.55                                 | 5.23      | 3.30                                 | 7.50              | 3.43                                 |
| <b>L59</b> | 53.48     | -1.97                                | 50.70     | -1.59                                | 52.09             | -1.78                                |
| <b>L60</b> | 26.24     | -1.91                                | 27.32     | -1.98                                | 26.78             | -1.95                                |
| <b>L61</b> | 33.39     | 3.97                                 | 45.46     | 4.04                                 | 39.42             | 4.01                                 |
| <b>L62</b> | 11.84     | 3.28                                 | 10.01     | 3.39                                 | 10.92             | 3.34                                 |
| <b>K09</b> | 13.44     | -1.47                                | 15.26     | -1.77                                | 14.35             | -1.62                                |
| <b>K14</b> | 12.60     | -3.35                                | 14.69     | -3.54                                | 13.64             | -3.44                                |
| no ligand  | 0.02      | -                                    | 0.04      | -                                    | 0.03              | -                                    |

<sup>a</sup> Run 2 was excluded.

### 3. List of calculated ligands and their parameters

#### 3.1 Calculated TEP and cone angle

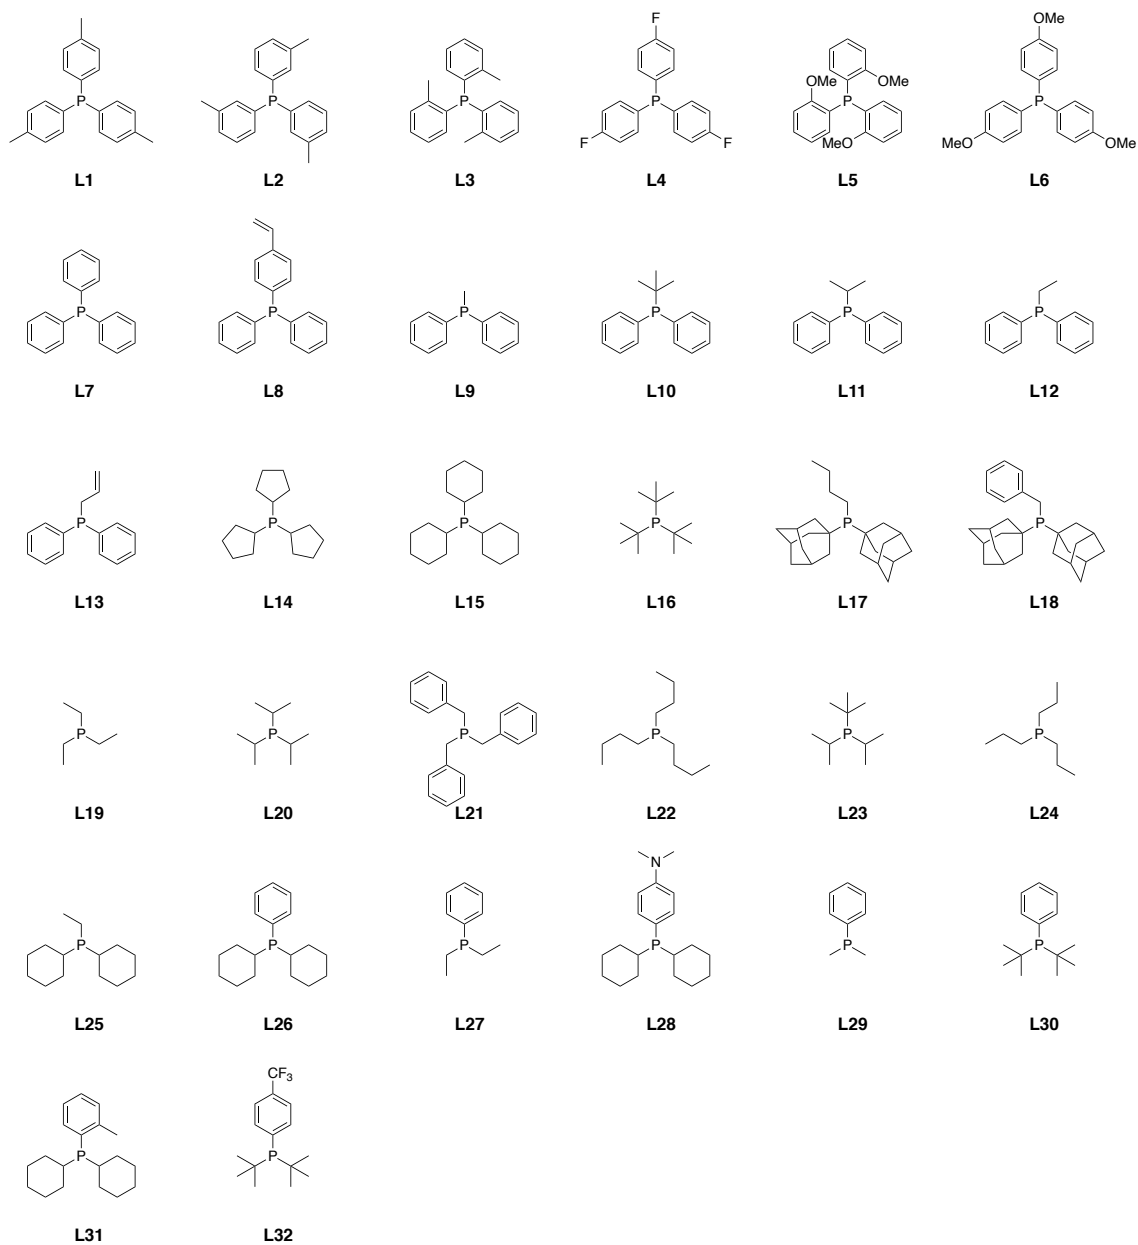

**Fig. S2.** Chemical structure of Phosphine ligands L1–L32.



**Table S2.** Calculated cone angles and TEP values of phosphine ligands **L1–L32**.

| Ligand     | most stable conformer |                                       | minimum cone angle conformer |                                       | Boltzmann-weighted average |                                       |
|------------|-----------------------|---------------------------------------|------------------------------|---------------------------------------|----------------------------|---------------------------------------|
|            | $\theta$ (°)          | $\nu_{\text{CO}}$ (cm <sup>-1</sup> ) | $\theta$ (°)                 | $\nu_{\text{CO}}$ (cm <sup>-1</sup> ) | $\theta$ (°)               | $\nu_{\text{CO}}$ (cm <sup>-1</sup> ) |
| <b>L1</b>  | 165                   | 2221                                  | 165                          | 2221                                  | 166                        | 2220                                  |
| <b>L2</b>  | 172                   | 2220                                  | 166                          | 2221                                  | 170                        | 2220                                  |
| <b>L3</b>  | 202                   | 2216                                  | 168                          | 2216                                  | 202                        | 2216                                  |
| <b>L4</b>  | 166                   | 2225                                  | 166                          | 2225                                  | 166                        | 2225                                  |
| <b>L5</b>  | 204                   | 2202                                  | 175                          | 2209                                  | 204                        | 2202                                  |
| <b>L6</b>  | 167                   | 2219                                  | 166                          | 2220                                  | 167                        | 2218                                  |
| <b>L7</b>  | 166                   | 2223                                  | 166                          | 2223                                  | 166                        | 2223                                  |
| <b>L8</b>  | 166                   | 2222                                  | 166                          | 2222                                  | 166                        | 2222                                  |
| <b>L9</b>  | 152                   | 2221                                  | 150                          | 2222                                  | 151                        | 2221                                  |
| <b>L10</b> | 164                   | 2216                                  | 164                          | 2216                                  | 164                        | 2216                                  |
| <b>L11</b> | 171                   | 2218                                  | 159                          | 2215                                  | 167                        | 2217                                  |
| <b>L12</b> | 170                   | 2222                                  | 145                          | 2220                                  | 163                        | 2220                                  |
| <b>L13</b> | 174                   | 2221                                  | 158                          | 2219                                  | 164                        | 2220                                  |
| <b>L14</b> | 171                   | 2208                                  | 162                          | 2210                                  | 173                        | 2209                                  |
| <b>L15</b> | 175                   | 2210                                  | 166                          | 2208                                  | 174                        | 2210                                  |
| <b>L16</b> | 185                   | 2206                                  | 185                          | 2206                                  | 185                        | 2206                                  |
| <b>L17</b> | 182                   | 2208                                  | 168                          | 2206                                  | 181                        | 2208                                  |
| <b>L18</b> | 189                   | 2209                                  | 168                          | 2208                                  | 191                        | 2209                                  |
| <b>L19</b> | 170                   | 2216                                  | 143                          | 2216                                  | 165                        | 2216                                  |
| <b>L20</b> | 174                   | 2211                                  | 168                          | 2213                                  | 175                        | 2212                                  |
| <b>L21</b> | 205                   | 2217                                  | 161                          | 2217                                  | 203                        | 2217                                  |
| <b>L22</b> | 172                   | 2214                                  | 136                          | 2216                                  | 171                        | 2214                                  |
| <b>L23</b> | 176                   | 2212                                  | 173                          | 2210                                  | 177                        | 2212                                  |
| <b>L24</b> | 168                   | 2214                                  | 142                          | 2217                                  | 166                        | 2215                                  |
| <b>L25</b> | 173                   | 2213                                  | 152                          | 2209                                  | 171                        | 2212                                  |
| <b>L26</b> | 176                   | 2213                                  | 156                          | 2212                                  | 173                        | 2214                                  |
| <b>L27</b> | 168                   | 2219                                  | 134                          | 2217                                  | 167                        | 2219                                  |
| <b>L28</b> | 176                   | 2211                                  | 160                          | 2211                                  | 173                        | 2211                                  |
| <b>L29</b> | 141                   | 2221                                  | 141                          | 2221                                  | 141                        | 2221                                  |
| <b>L30</b> | 185                   | 2213                                  | 185                          | 2213                                  | 185                        | 2213                                  |
| <b>L31</b> | 180                   | 2213                                  | 167                          | 2210                                  | 180                        | 2213                                  |
| <b>L32</b> | 184                   | 2216                                  | 184                          | 2215                                  | 184                        | 2215                                  |

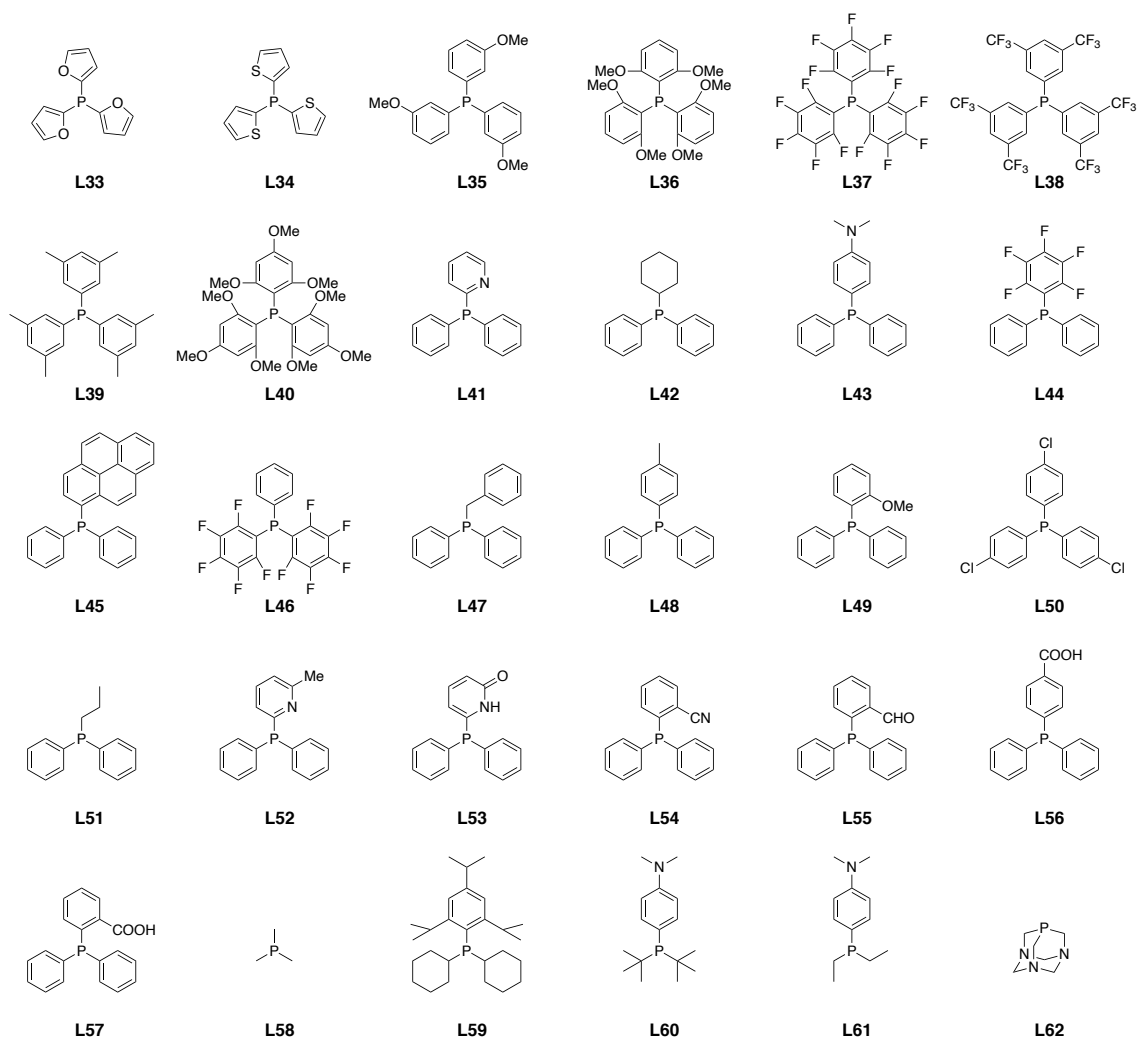

**Fig. S3.** Chemical structure of Phosphine ligands **L33–L62**.

**Table S3.** Calculated cone angles and TEP values of phosphine ligands **L33–L62**.

| Ligand     | most stable conformer |                                       | minimum cone angle conformer |                                       | Boltzmann-weighted average |                                       |
|------------|-----------------------|---------------------------------------|------------------------------|---------------------------------------|----------------------------|---------------------------------------|
|            | $\theta$ (°)          | $\nu_{\text{CO}}$ (cm <sup>-1</sup> ) | $\theta$ (°)                 | $\nu_{\text{CO}}$ (cm <sup>-1</sup> ) | $\theta$ (°)               | $\nu_{\text{CO}}$ (cm <sup>-1</sup> ) |
| <b>L33</b> | 164                   | 2229                                  | 142                          | 2228                                  | 162                        | 2229                                  |
| <b>L34</b> | 171                   | 2226                                  | 161                          | 2228                                  | 167                        | 2227                                  |
| <b>L35</b> | 200                   | 2216                                  | 164                          | 2223                                  | 182                        | 2219                                  |
| <b>L36</b> | 210                   | 2196                                  | 199                          | 2199                                  | 209                        | 2197                                  |
| <b>L37</b> | 173                   | 2232                                  | 159                          | 2238                                  | 173                        | 2232                                  |
| <b>L38</b> | 185                   | 2235                                  | 179                          | 2235                                  | 185                        | 2235                                  |
| <b>L39</b> | 172                   | 2219                                  | 172                          | 2219                                  | 175                        | 2219                                  |
| <b>L40</b> | 208                   | 2194                                  | 200                          | 2196                                  | 208                        | 2195                                  |
| <b>L41</b> | 163                   | 2220                                  | 150                          | 2221                                  | 161                        | 2221                                  |
| <b>L42</b> | 171                   | 2219                                  | 154                          | 2214                                  | 168                        | 2218                                  |
| <b>L43</b> | 166                   | 2220                                  | 166                          | 2220                                  | 166                        | 2220                                  |
| <b>L44</b> | 166                   | 2226                                  | 166                          | 2224                                  | 168                        | 2226                                  |
| <b>L45</b> | 173                   | 2220                                  | 162                          | 2220                                  | 172                        | 2220                                  |
| <b>L46</b> | 167                   | 2232                                  | 167                          | 2232                                  | 167                        | 2232                                  |
| <b>L47</b> | 170                   | 2219                                  | 149                          | 2217                                  | 171                        | 2219                                  |
| <b>L48</b> | 166                   | 2221                                  | 166                          | 2221                                  | 166                        | 2221                                  |
| <b>L49</b> | 175                   | 2216                                  | 163                          | 2219                                  | 175                        | 2216                                  |
| <b>L50</b> | 166                   | 2226                                  | 166                          | 2226                                  | 166                        | 2226                                  |
| <b>L51</b> | 170                   | 2219                                  | 145                          | 2218                                  | 164                        | 2219                                  |
| <b>L52</b> | 172                   | 2221                                  | 160                          | 2220                                  | 167                        | 2221                                  |
| <b>L53</b> | 165                   | 2227                                  | 165                          | 2227                                  | 165                        | 2227                                  |
| <b>L54</b> | 174                   | 2225                                  | 161                          | 2221                                  | 173                        | 2225                                  |
| <b>L55</b> | 169                   | 2224                                  | 161                          | 2222                                  | 169                        | 2223                                  |
| <b>L56</b> | 166                   | 2221                                  | 166                          | 2221                                  | 166                        | 2222                                  |
| <b>L57</b> | 175                   | 2221                                  | 158                          | 2222                                  | 176                        | 2221                                  |
| <b>L58</b> | 120                   | 2219                                  | 120                          | 2219                                  | 120                        | 2219                                  |
| <b>L59</b> | 200                   | 2211                                  | 175                          | 2208                                  | 199                        | 2210                                  |
| <b>L60</b> | 185                   | 2212                                  | 185                          | 2212                                  | 185                        | 2212                                  |
| <b>L61</b> | 168                   | 2214                                  | 137                          | 2214                                  | 168                        | 2214                                  |
| <b>L62</b> | 115                   | 2224                                  | 115                          | 2224                                  | 115                        | 2224                                  |

The chemical structures of the ligands **K1–K18** are shown in the manuscript (Fig. 6b). **K1**, **K3**, **K4**, **K5**, and **K11** are the same molecules as **L58**, **L19**, **L62**, **L20**, and **L16**, respectively, but the procedure used to calculate each parameter (primarily conformation sampling) is different (Section 1.1 in the ESI). We confirmed that the parameters for each ligand obtained using the two procedures were largely similar.

**Table S4.** Calculated cone angles and TEP values of phosphine ligands **K1–K18**.

| Ligand     | most stable conformer |                                       | minimum cone angle conformer |                                       | Boltzmann-weighted average |                                       |
|------------|-----------------------|---------------------------------------|------------------------------|---------------------------------------|----------------------------|---------------------------------------|
|            | $\theta$ (°)          | $\nu_{\text{CO}}$ (cm <sup>-1</sup> ) | $\theta$ (°)                 | $\nu_{\text{CO}}$ (cm <sup>-1</sup> ) | $\theta$ (°)               | $\nu_{\text{CO}}$ (cm <sup>-1</sup> ) |
| <b>K1</b>  | 120                   | 2219                                  | 120                          | 2219                                  | 120                        | 2219                                  |
| <b>K2</b>  | 128                   | 2219                                  | 128                          | 2219                                  | 128                        | 2219                                  |
| <b>K3</b>  | 170                   | 2216                                  | 143                          | 2214                                  | 161                        | 2216                                  |
| <b>K4</b>  | 115                   | 2224                                  | 115                          | 2224                                  | 115                        | 2224                                  |
| <b>K5</b>  | 175                   | 2213                                  | 168                          | 2211                                  | 175                        | 2212                                  |
| <b>K6</b>  | 173                   | 2216                                  | 133                          | 2215                                  | 170                        | 2217                                  |
| <b>K7</b>  | 120                   | 2228                                  | 120                          | 2228                                  | 120                        | 2228                                  |
| <b>K8</b>  | 104                   | 2228                                  | 104                          | 2228                                  | 104                        | 2228                                  |
| <b>K9</b>  | 187                   | 2203                                  | 187                          | 2203                                  | 187                        | 2203                                  |
| <b>K10</b> | 140                   | 2234                                  | 134                          | 2230                                  | 140                        | 2233                                  |
| <b>K11</b> | 185                   | 2211                                  | 185                          | 2208                                  | 185                        | 2209                                  |
| <b>K12</b> | 182                   | 2238                                  | 151                          | 2234                                  | 171                        | 2237                                  |
| <b>K13</b> | 205                   | 2208                                  | 202                          | 2209                                  | 205                        | 2208                                  |
| <b>K14</b> | 205                   | 2215                                  | 183                          | 2211                                  | 205                        | 2214                                  |
| <b>K15</b> | 169                   | 2242                                  | 169                          | 2242                                  | 169                        | 2242                                  |
| <b>K16</b> | 206                   | 2230                                  | 196                          | 2233                                  | 206                        | 2230                                  |
| <b>K17</b> | 138                   | 2252                                  | 138                          | 2252                                  | 138                        | 2252                                  |
| <b>K18</b> | 183                   | 2252                                  | 163                          | 2252                                  | 179                        | 2252                                  |

### 3.2 Predicted values of $\Delta\Delta G^\ddagger$

**Table S5.** Predicted  $\Delta\Delta G^\ddagger$  using representative values of the TEP and the cone angle.

| Ligand | $\Delta\Delta G^\ddagger_{\text{predicted}}$ (kcal/mol) |                              |                            |
|--------|---------------------------------------------------------|------------------------------|----------------------------|
|        | most stable conformer                                   | minimum cone angle conformer | Boltzmann-weighted average |
| L1     | 4.57                                                    | 4.57                         | 4.88                       |
| L2     | 4.33                                                    | 4.48                         | 4.48                       |
| L3     | -1.41                                                   | 6.15                         | -1.22                      |
| L5     | 2.44                                                    | 6.79                         | 2.53                       |
| L6     | 5.27                                                    | 5.09                         | 5.50                       |
| L7     | 3.70                                                    | 3.70                         | 3.70                       |
| L8     | 4.09                                                    | 4.09                         | 4.17                       |
| L9     | 4.92                                                    | 4.63                         | 4.80                       |
| L10    | 6.50                                                    | 6.50                         | 6.50                       |
| L11    | 5.46                                                    | 6.97                         | 5.89                       |
| L12    | 4.02                                                    | 5.54                         | 5.00                       |
| L13    | 4.03                                                    | 5.56                         | 5.09                       |
| L14    | 4.72                                                    | 5.97                         | 4.14                       |
| L15    | 3.24                                                    | 5.95                         | 3.37                       |
| L16    | -0.66                                                   | -0.66                        | -0.66                      |
| L17    | 0.88                                                    | 5.92                         | 1.43                       |
| L18    | -4.53                                                   | 5.44                         | -5.28                      |
| L19    | 2.48                                                    | 6.09                         | 3.74                       |
| L20    | 3.13                                                    | 4.27                         | 2.84                       |
| L21    | -7.61                                                   | 4.35                         | -7.51                      |
| L22    | 2.63                                                    | 6.35                         | 2.96                       |
| L23    | 2.34                                                    | 3.65                         | 2.15                       |
| L24    | 3.84                                                    | 5.76                         | 4.07                       |
| L25    | 2.96                                                    | 7.57                         | 3.57                       |
| L26    | 2.08                                                    | 6.37                         | 2.47                       |
| L27    | 2.16                                                    | 5.93                         | 2.50                       |
| L28    | 2.81                                                    | 6.11                         | 3.49                       |
| L29    | 4.34                                                    | 4.34                         | 4.34                       |
| L30    | -2.28                                                   | -2.28                        | -2.28                      |
| L31    | 0.19                                                    | 5.27                         | 0.04                       |
| L32    | -3.12                                                   | -2.90                        | -2.96                      |
| L35    | -0.05                                                   | 4.03                         | 3.32                       |
| L36    | 1.40                                                    | 5.22                         | 1.27                       |
| L37    | -0.67                                                   | -1.93                        | -0.67                      |
| L39    | 4.67                                                    | 4.67                         | 4.54                       |
| L40    | 2.51                                                    | 5.40                         | 2.25                       |
| L41    | 5.08                                                    | 4.82                         | 4.70                       |
| L42    | 4.98                                                    | 7.28                         | 5.41                       |

**Table S5. (continued)**

| Ligand | $\Delta\Delta G^{\ddagger}_{\text{predicted}}$ (kcal/mol) |                              | Boltzmann-weighted average |
|--------|-----------------------------------------------------------|------------------------------|----------------------------|
|        | most stable conformer                                     | minimum cone angle conformer |                            |
| L43    | 4.95                                                      | 4.95                         | 4.95                       |
| L45    | 4.57                                                      | 5.23                         | 4.61                       |
| L47    | 5.20                                                      | 6.33                         | 5.10                       |
| L48    | 4.73                                                      | 4.73                         | 4.56                       |
| L49    | 5.31                                                      | 5.61                         | 5.32                       |
| L51    | 4.92                                                      | 6.01                         | 5.50                       |
| L54    | 2.20                                                      | 4.78                         | 2.46                       |
| L55    | 3.23                                                      | 4.57                         | 3.46                       |
| L56    | 4.59                                                      | 4.59                         | 4.10                       |
| L57    | 3.72                                                      | 4.54                         | 3.48                       |
| L58    | 5.64                                                      | 5.64                         | 5.64                       |
| L59    | -7.03                                                     | 4.00                         | -6.90                      |
| L60    | -1.99                                                     | -1.99                        | -1.99                      |
| L61    | 3.70                                                      | 6.91                         | 3.88                       |
| L62    | 3.13                                                      | 3.13                         | 3.13                       |
| K1     | –                                                         | –                            | 5.73                       |
| K2     | –                                                         | –                            | 5.52                       |
| K3     | –                                                         | –                            | 4.54                       |
| K4     | –                                                         | –                            | 3.36                       |
| K5     | –                                                         | –                            | 2.53                       |
| K6     | –                                                         | –                            | 2.41                       |
| K7     | –                                                         | –                            | 2.10                       |
| K8     | –                                                         | –                            | -0.30                      |
| K9     | –                                                         | –                            | -0.37                      |
| K10    | –                                                         | –                            | -0.66                      |
| K11    | –                                                         | –                            | -1.83                      |
| K12    | –                                                         | –                            | -6.29                      |
| K13    | –                                                         | –                            | -7.37                      |
| K14    | –                                                         | –                            | -7.55                      |
| K15    | –                                                         | –                            | -8.30                      |
| K16    | –                                                         | –                            | -8.58                      |
| K17    | –                                                         | –                            | -8.86                      |
| K18    | –                                                         | –                            | -9.51                      |

## 4. Sampling of ligand–ligand interaction

### 4.1 Procedure and results

The interaction energies between the real ligands ( $E_{L-L}$ ) were computationally sampled using the following procedure: Assuming that two real ligands coordinate to a single metal atom with a bite angle  $\phi$  (the term was originally coined for bidentate ligands, but we applied it to two molecules of monodentate ligands for convenience), these ligands were placed 2.28 Å from the origin (**O**) while directing the lone pair orbital to the origin (Fig. S4a). Geometry optimization of the system was performed with the Cartesian coordinates of the phosphorus atoms (**P**<sub>1</sub> and **P**<sub>2</sub>) fixed at  $\mathbf{p}_1 = (2.28, 0, 0)$  and  $\mathbf{p}_2 = (2.28 \cos \phi, 2.28 \sin \phi, 0)$ , respectively, at the  $\omega$ B97X-D/def2-SV(P) level. During the optimization process, a penalty function was added to the electronic energy of the system to prevent the rotation of ligands other than around **OP**<sub>*i*</sub> axes, thus preserving the direction of the lone pair orbitals. Specifically, in each iteration of the geometry optimization, a harmonic potential based on the angles  $\psi_i$  ( $i = 1-6$ ) defined by **O**, the phosphorus atom (**P**<sub>1</sub> or **P**<sub>2</sub>), and each atom bonded to the phosphorus atom ( $\alpha$  atom) was added, as shown in Fig. S4b, in the same manner as the keep potential (see Section 5.2 of the ESI for implementation). After the geometry optimization of the system,  $E_{L-L}$  was calculated as follows:

$$E_{L-L} = E_{\text{system}} - 2E_L$$

where  $E_{\text{system}}$  is the electronic energy of the optimized system (without penalty) and  $E_L$  is the electronic energy of the corresponding ligand optimized independently. A combination of 23 ligands and six bite angles ( $\phi = 90^\circ, 100^\circ, 110^\circ, 120^\circ, 140^\circ$ , and  $180^\circ$ ) were sampled and are summarized in Table S6.

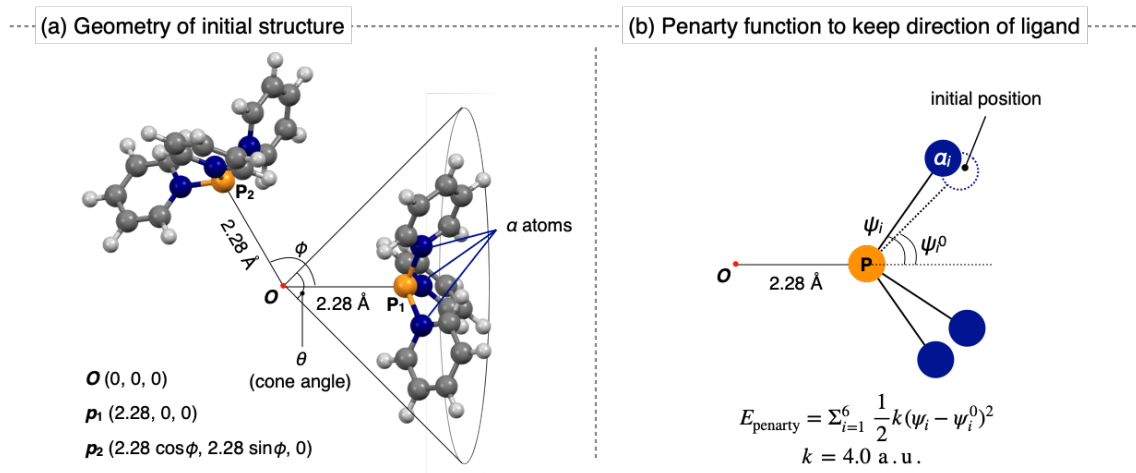

Fig. S4. Sampling procedure for L-L interaction energies ( $E_{L-L}$ ) of real ligands.

**Table S6.** L-L interaction energies ( $E_{L-L}$ ) of various ligands and bite angles.

| ligand                            | $\theta$ (°) | $\phi$ (°) | $E_{L-L}$ | ligand                                                                               | $\theta$ (°) | $\phi$ (°) | $E_{L-L}$ |
|-----------------------------------|--------------|------------|-----------|--------------------------------------------------------------------------------------|--------------|------------|-----------|
| PCl <sub>3</sub>                  | 117          | 90         | 4.18      | 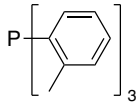   | 210          | 90         | N.A.      |
|                                   |              | 100        | -1.16     |                                                                                      |              | 100        | 4.61      |
|                                   |              | 110        | -1.73     |                                                                                      |              | 110        | -1.40     |
|                                   |              | 120        | -1.44     |                                                                                      |              | 120        | -7.49     |
|                                   |              | 140        | -0.88     |                                                                                      |              | 140        | -11.72    |
|                                   |              | 180        | -0.60     |                                                                                      |              | 180        | -8.95     |
| PMe <sub>3</sub>                  | 117          | 90         | 11.05     |    | 161          | 90         | -3.30     |
|                                   |              | 100        | 3.06      |                                                                                      |              | 100        | -9.35     |
|                                   |              | 110        | 0.59      |                                                                                      |              | 110        | -11.11    |
|                                   |              | 120        | 0.39      |                                                                                      |              | 120        | -10.12    |
|                                   |              | 140        | 0.65      |                                                                                      |              | 140        | -6.76     |
|                                   |              | 180        | 0.76      |                                                                                      |              | 180        | -2.24     |
| P(CCl <sub>3</sub> ) <sub>3</sub> | 171          | 90         | N.A.      |  | 162          | 90         | -0.29     |
|                                   |              | 100        | N.A.      |                                                                                      |              | 100        | -7.27     |
|                                   |              | 110        | (32.78)   |                                                                                      |              | 110        | -9.49     |
|                                   |              | 120        | 14.95     |                                                                                      |              | 120        | -8.39     |
|                                   |              | 140        | -2.71     |                                                                                      |              | 140        | -5.35     |
|                                   |              | 180        | -3.15     |                                                                                      |              | 180        | -2.24     |
| P(CF <sub>3</sub> ) <sub>3</sub>  | 137          | 90         | 17.60     |  | 163          | 90         | 2.12      |
|                                   |              | 100        | 4.08      |                                                                                      |              | 100        | -5.96     |
|                                   |              | 110        | -1.49     |                                                                                      |              | 110        | -8.18     |
|                                   |              | 120        | -2.68     |                                                                                      |              | 120        | -8.03     |
|                                   |              | 140        | -1.62     |                                                                                      |              | 140        | -4.89     |
|                                   |              | 180        | -0.88     |                                                                                      |              | 180        | -2.15     |
| P <i>t</i> Bu <sub>3</sub>        | 187          | 90         | N.A.      |  | 163          | 90         | (80.03)   |
|                                   |              | 100        | N.A.      |                                                                                      |              | 100        | -5.44     |
|                                   |              | 110        | (57.27)   |                                                                                      |              | 110        | -8.60     |
|                                   |              | 120        | (34.67)   |                                                                                      |              | 120        | -10.04    |
|                                   |              | 140        | 2.20      |                                                                                      |              | 140        | -5.63     |
|                                   |              | 180        | -4.77     |                                                                                      |              | 180        | -0.90     |

$E_{L-L}$  values are reported in kcal/mol. N.A.: Not applied.  $E_{L-L}$  values larger than 30 kcal/mol are shown in parentheses but are ignored in the discussion below, as they are quite unrealistic.



Table S6. (continued)

| ligand                                                                              | $\theta$ (°) | $\phi$ (°) | $E_{L-L}$ | ligand                                                                               | $\theta$ (°) | $\phi$ (°) | $E_{L-L}$ |
|-------------------------------------------------------------------------------------|--------------|------------|-----------|--------------------------------------------------------------------------------------|--------------|------------|-----------|
| 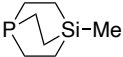   | 126          | 90         | 7.67      |    | 163          | 90         | -1.30     |
|                                                                                     |              | 100        | 1.18      |                                                                                      |              | 100        | -6.15     |
|                                                                                     |              | 110        | -0.42     |                                                                                      |              | 110        | -6.84     |
|                                                                                     |              | 120        | -0.20     |                                                                                      |              | 120        | -11.15    |
|                                                                                     |              | 140        | 0.29      |                                                                                      |              | 140        | -5.66     |
|                                                                                     |              | 180        | 0.59      |                                                                                      |              | 180        | -1.75     |
| <hr/>                                                                               |              |            |           |                                                                                      |              |            |           |
| PH <sub>3</sub>                                                                     | 86           | 90         | 3.89      | PPh <sub>3</sub>                                                                     | 162          | 90         | 2.51      |
|                                                                                     |              | 100        | 1.77      |                                                                                      |              | 100        | -4.72     |
|                                                                                     |              | 110        | 0.93      |                                                                                      |              | 110        | -6.73     |
|                                                                                     |              | 120        | 0.59      |                                                                                      |              | 120        | -6.75     |
|                                                                                     |              | 140        | 0.42      |                                                                                      |              | 140        | -4.55     |
|                                                                                     |              | 180        | 0.40      |                                                                                      |              | 180        | -1.87     |
| <hr/>                                                                               |              |            |           |                                                                                      |              |            |           |
| P(SiH <sub>3</sub> ) <sub>3</sub>                                                   | 126          | 90         | 8.49      | P(C <sub>6</sub> F <sub>5</sub> ) <sub>3</sub>                                       | 191          | 90         | (62.12)   |
|                                                                                     |              | 100        | 0.77      |                                                                                      |              | 100        | -13.20    |
|                                                                                     |              | 110        | -1.66     |                                                                                      |              | 110        | -13.56    |
|                                                                                     |              | 120        | -2.15     |                                                                                      |              | 120        | -15.65    |
|                                                                                     |              | 140        | -1.00     |                                                                                      |              | 140        | -11.90    |
|                                                                                     |              | 180        | -0.41     |                                                                                      |              | 180        | -7.63     |
| <hr/>                                                                               |              |            |           |                                                                                      |              |            |           |
| P(SiMe <sub>3</sub> ) <sub>3</sub>                                                  | 182          | 90         | N.A.      |  | 140          | 90         | -0.50     |
|                                                                                     |              | 100        | N.A.      |                                                                                      |              | 100        | -5.25     |
|                                                                                     |              | 110        | 24.47     |                                                                                      |              | 110        | -5.10     |
|                                                                                     |              | 120        | 9.32      |                                                                                      |              | 120        | -4.56     |
|                                                                                     |              | 140        | -0.94     |                                                                                      |              | 140        | -1.34     |
|                                                                                     |              | 180        | -3.64     |                                                                                      |              | 180        | -0.02     |
| <hr/>                                                                               |              |            |           |                                                                                      |              |            |           |
|  | 113          | 90         | 7.21      |  | 162          | 90         | 1.21      |
|                                                                                     |              | 100        | 0.34      |                                                                                      |              | 100        | -6.03     |
|                                                                                     |              | 110        | -0.62     |                                                                                      |              | 110        | -7.96     |
|                                                                                     |              | 120        | -0.43     |                                                                                      |              | 120        | -8.89     |
|                                                                                     |              | 140        | -0.04     |                                                                                      |              | 140        | -5.84     |
|                                                                                     |              | 180        | 0.15      |                                                                                      |              | 180        | -2.12     |

$E_{L-L}$  values are reported in kcal/mol. N.A.: Not applied.  $E_{L-L}$  values larger than 30 kcal/mol are shown in parentheses but are ignored in the discussion below, as they are quite unrealistic.

**Table S6. (continued)**

| ligand                                                                            | $\theta$ (°) | $\phi$ (°) | $E_{L-L}$ | ligand                                                                             | $\theta$ (°) | $\phi$ (°) | $E_{L-L}$ |
|-----------------------------------------------------------------------------------|--------------|------------|-----------|------------------------------------------------------------------------------------|--------------|------------|-----------|
|  | 103          | 90         | 0.57      |  | 174          | 90         | (65.53)   |
|                                                                                   |              | 100        | -0.05     |                                                                                    |              | 100        | -8.82     |
|                                                                                   |              | 110        | -0.20     |                                                                                    |              | 110        | -11.37    |
|                                                                                   |              | 120        | -0.20     |                                                                                    |              | 120        | -10.73    |
|                                                                                   |              | 140        | -0.09     |                                                                                    |              | 140        | -8.17     |
|                                                                                   |              | 180        | 0.05      |                                                                                    |              | 180        | -3.34     |
|  | 130          | 90         | 2.37      |                                                                                    |              |            |           |
|                                                                                   |              | 100        | -1.74     |                                                                                    |              |            |           |
|                                                                                   |              | 110        | -1.88     |                                                                                    |              |            |           |
|                                                                                   |              | 120        | -1.67     |                                                                                    |              |            |           |
|                                                                                   |              | 140        | -0.75     |                                                                                    |              |            |           |
|                                                                                   |              | 180        | -0.16     |                                                                                    |              |            |           |

$E_{L-L}$  values are reported in kcal/mol. N.A.: Not applied.  $E_{L-L}$  values larger than 30 kcal/mol are shown in parentheses but are ignored in the discussion below, as they are quite unrealistic.

## 4.2 Discussion

The calculated values of  $E_{L-L}$  were plotted against the cone angle ( $\theta$ ) of the ligands and bite angle ( $\phi$ ), as shown in Fig. S5a. We found that the trend of  $E_{L-L}$  cannot be described only by the  $\theta$  and  $\phi$ . For example, the  $E_{L-L}$  of  $P(\text{SiMe}_3)_3$  at  $\phi = 120^\circ$  was 9.3 kcal/mol (repulsive), while the  $E_{L-L}$  of  $P(\text{C}_6\text{F}_5)_3$ , whose cone angle is slightly larger than that of  $P(\text{SiMe}_3)_3$ , was  $-13.6$  kcal/mol (attractive) at the same bite angle. This is likely caused by the stabilization of the two molecules of  $P(\text{C}_6\text{F}_5)_3$  through intermolecular  $\pi$ - $\pi$  interactions, as shown in Fig. S5a (right). Considering these results, we classified ligands into two groups: triaryl phosphines ( $\text{PAr}_3$ ) and others ( $\text{PR}_3$ ,  $\text{R} \neq \text{Ar}$ ). The former group is expected to exhibit negative  $E_{L-L}$  values due to attractive  $\pi$ - $\pi$  interactions when two ligands are located close together, while the latter group would exhibit positive  $E_{L-L}$  values due to the typical steric repulsion. This trend was confirmed by separately plotting the  $E_{L-L}$  values for each group (Fig. S5b). Specifically, the  $\text{PR}_3$ -type ligands showed a trend of  $E_{L-L}$  where combinations of a large cone angle ( $\theta$ ) and a small bite angle ( $\phi$ ) resulted in a large positive value of  $E_{L-L}$  (Fig. S5b, right). In contrast, the  $E_{L-L}$  values for triaryl phosphines ( $\text{PAr}_3$ ) had a minimum around  $\theta = 180^\circ$  and  $\phi = 120^\circ$ , clearly showing the effect of stabilization through intermolecular  $\pi$ - $\pi$  interactions (Fig. S5b, left). As a result, the  $V_{L-L}$  term of the cone potential of **VL2**, which describes the interactions of two virtual ligands, was separately optimized for each type of L-L interaction and implemented as **VL2<sub>PR3</sub>** and **VL2<sub>PAr3</sub>**, respectively (Section 5.5 of the ESI).

(a) Plot of  $E_{L-L}$  against  $\theta$  and  $\phi$

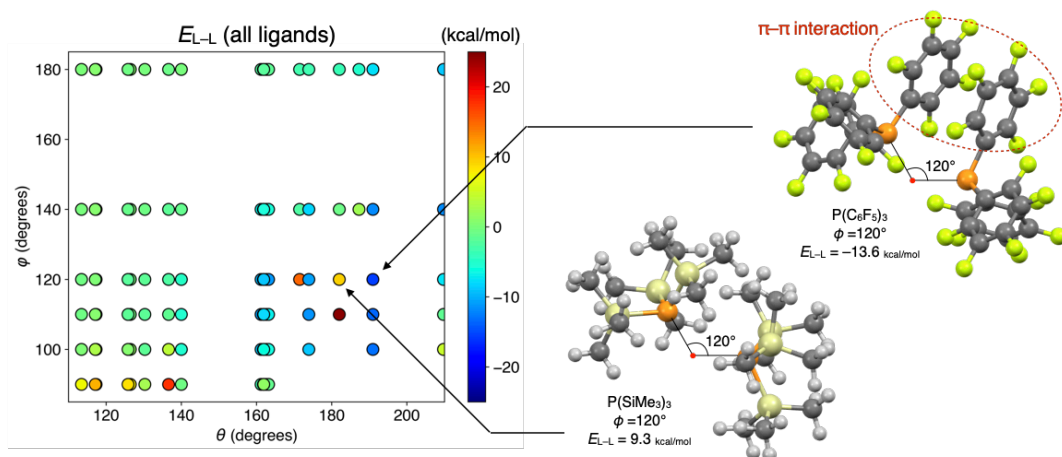

(b) Classification of ligands

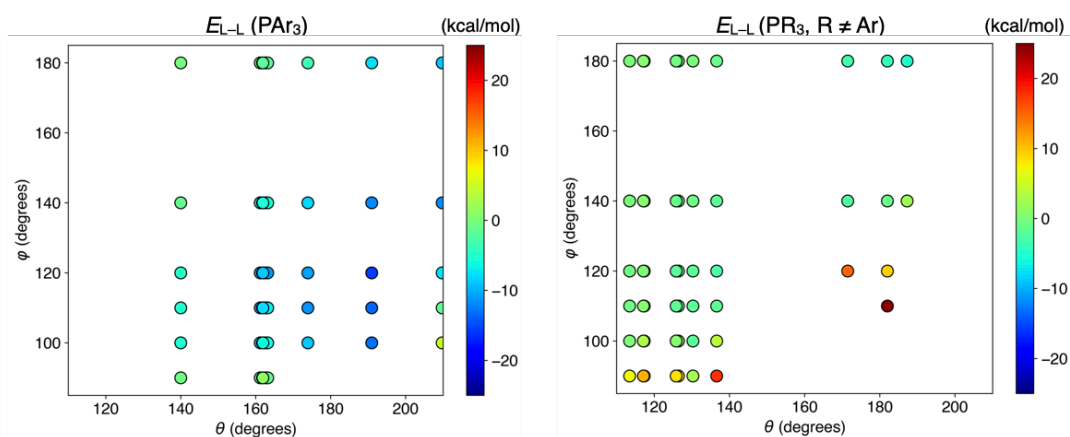

Fig. S5. Plot of the calculated  $E_{L-L}$  values against cone angle ( $\theta$ ) and bite angle ( $\phi$ ).

## 5. Implementation and performance of virtual ligands

### 5.1 General

In this study, virtual ligands were implemented in interface codes combining the GRRM program with Gaussian 16. During a geometry optimization process, Gaussian 16 performs an electronic structure calculation for a given geometry and sends the output, including energy, gradient vector, and Hessian matrix, to the GRRM software. The GRRM program then calculates a new geometry based on the given geometry, energy, gradient vector, and Hessian matrix, and sends it back to Gaussian 16. The virtual ligands were implemented by adding the energies, gradient vectors, and Hessian matrices resulting from the keep potential and either the cone potential (for the original version and **VL2**) or the 12-6 Lennard-Jones (LJ) potential (for **VL1**) to the Gaussian 16 output.

### 5.2 Implementation of keep potential

Using Cartesian coordinates of phosphorus atoms ( $\mathbf{p} = (x_p, y_p, z_p)$ ) and chlorine atoms ( $\mathbf{l}_i = (x_{Cl-i}, y_{Cl-i}, z_{Cl-i})$ ,  $i = 1-3$ ) in a virtual ligand, the energy arising from the keep potential can be formulated as follows:

$$V_{keep} = \sum_{i=1}^3 \frac{1}{2} k (r_i - r_0)^2$$
$$r_i = |\mathbf{l}_i - \mathbf{p}|$$

where  $k$ ,  $r_i$ , and  $r_0$  are the force constant, the distance between the P and  $i$ th Cl atom, and the equilibrium distance of the harmonic potential, respectively. The force constant was set to  $4.48 \times 10^3$  kcal/(mol  $\text{\AA}^2$ ) (2.0 a.u.). The gradient vector and Hessian matrix arising from the keep potential were calculated as partial derivatives.

The electronic effect of a real ligand can be simulated by adjusting the  $r_0$  value to match the TEP value of the ligand calculated at the same computational level.<sup>S9</sup> The relationship between  $r_0$  and TEP values of the virtual ligand is shown in Fig. S6.

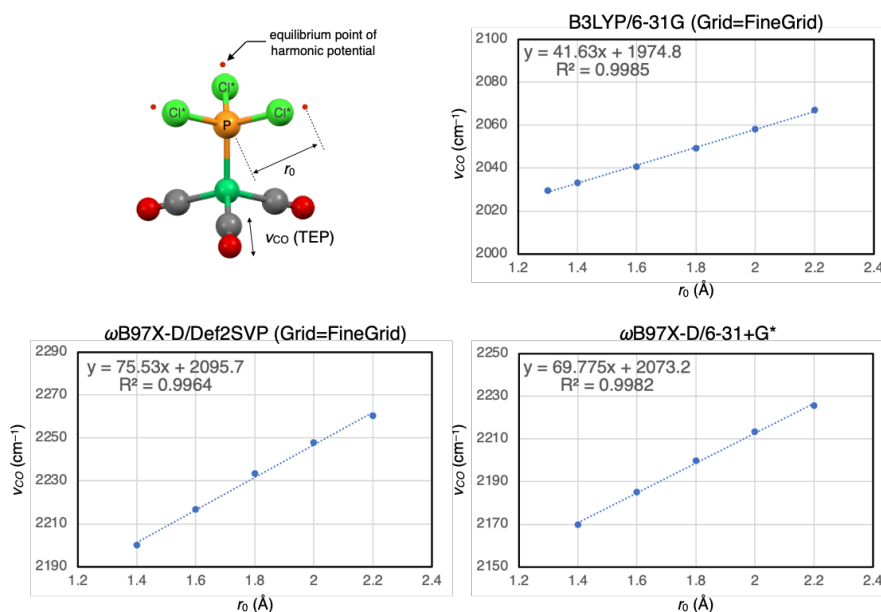

Fig. S6. Relationship between the  $r_0$  and TEP value of the virtual ligand.

### 5.3 Implementation of VL1

The original virtual ligand used a cone potential to reproduce the steric effect of the real ligand (Fig. S7, left). The cone was positioned 2.28 Å from the phosphorus atom of  $\text{PCl}_3^*$  and had an apex angle  $\theta$  corresponding to the cone angle of the real ligands. The repulsion energy for each atom in the substrate was calculated based on the distance between the atom and the surface of the cone. The repulsive term of the optimized 12-6 LJ potential was used as the potential function. While the cone potential accurately captured the relationship between the cone angles and steric effects of real ligands, we identified a weakness in its design. The position of the apex, apex angle, and direction of the cone are uniquely defined by  $\text{PCl}_3^*$  and the cone angle. However, the length of the cone ( $L$  in Fig. S7, left panel) is not fixed (it is treated as infinite). As a result, even if a substrate is located far from the virtual ligand (e.g., **1** in Fig. S7, left panel), the corresponding repulsion energy is still calculated, leading to an overestimation of the steric repulsion. Moreover, if a substrate is placed on the back of  $\text{PCl}_3^*$  (e.g., **2**), an unrealistic, large repulsive energy is exerted. These incidents would not normally occur in typical quantum chemical calculations, such as geometry optimizations, unless there are “unnatural” forces working against the repulsive force from the cone exist. However, in the case of automated reaction path search calculations using the SC-AFIR method,<sup>S3</sup> where “artificial” forces are used to explore accessible minima and TSs from a given initial structure as much as possible, these situations could occur due to the rotation or flipping of the virtual ligand. To address this issue, we developed an alternative method for reproducing the steric effect of real ligands that is more robust in these types of calculations (Fig. S7, right panel). In this method, the steric effect of a real ligand is simulated using a simple 12-6 LJ potential between the substrate and  $\text{Cl}^*$  atoms in the virtual ligand. The parameters for the 12-6 LJ potential were adopted from the values reported for the universal force field (UFF).<sup>S18</sup>

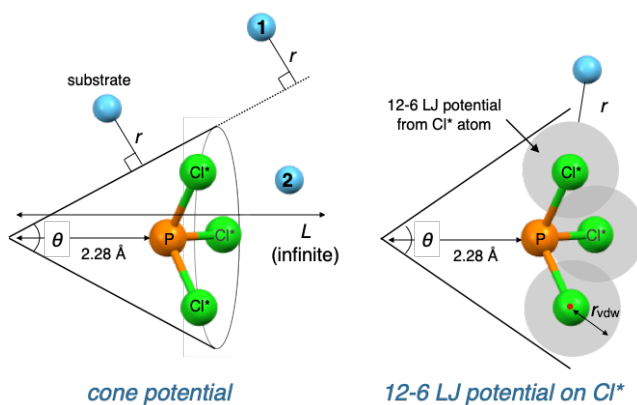

**Fig. S7.** Schematic illustration of the cone potential (left) and the newly developed steric approximation using 12-6 LJ potential from  $\text{Cl}^*$  atoms (right).

In this method, the cone angle of a real ligand can be simulated by scaling the parameter of the 12-6 LJ potential based on the van der Waals radii of the Cl\* atoms. Particularly, for a given geometry of  $\text{PCl}_3^*$ , the cone angle of the virtual ligand ( $\theta$ ) can be geometrically calculated as follows:

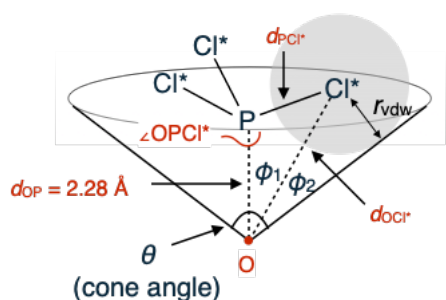

$$\theta = 2(\phi_1 + \phi_2)$$

$$\phi_1 = \arctan \left[ \frac{d_{\text{PCl}^*} \sin(\pi - \angle \text{OPCl}^*)}{d_{\text{OP}} + d_{\text{PCl}^*} \cos(\pi - \angle \text{OPCl}^*)} \right]$$

$$\phi_2 = \arcsin \left( \frac{r_{\text{vdw}}}{d_{\text{OCl}^*}} \right)$$

$$d_{\text{OCl}^*} = \frac{d_{\text{OP}} + d_{\text{PCl}^*} \cos(\pi - \angle \text{OPCl}^*)}{\cos \phi_1}$$

where  $d_{\text{OP}}$ ,  $d_{\text{PCl}^*}$ , and  $d_{\text{OCl}^*}$  are the distances between the apex of the cone and the P atom, the P atom and the Cl\* atom, and the apex of the cone and the Cl\* atom, respectively;  $\angle \text{OPCl}^*$  is the angle defined by the apex, the P atom, and the Cl\* atom, and  $r_{\text{vdw}}$  is the van der Waals radius of the Cl\* atom. The position of apex (O) was set to be 2.28 Å from the P atom, following the definition of the cone angle.<sup>S8</sup> Since the values of  $d_{\text{PCl}^*}$ , and  $\angle \text{OPCl}^*$  change depending on the  $r_0$  value of the keep potential (see section 5.2 of the ESI), representative values were obtained from the optimized structure of  $(\text{Cl}_3^*\text{P})\text{Ni}(\text{CO})_3$ , as presented in Tables S7 and S8. The  $r_0$  and  $r_{\text{vdw}}$  values used to reproduce the electronic and steric effects of  $\text{PPh}_3$  are listed in Table S7. For example, the TEP ( $\nu_{\text{CO}}$ ) of  $\text{PPh}_3$  was estimated to be 2027.7  $\text{cm}^{-1}$  at the B3LYP/6-31G level, and the  $r_0$  to reproduce this value was calculated to be 1.3 Å based on Fig. S6. The  $d_{\text{PCl}^*}$  and  $\angle \text{OPCl}^*$  values were extracted from the optimized structure of  $(\text{Cl}_3^*\text{P})\text{Ni}(\text{CO})_3$  ( $r_0 = 1.3$  Å), and the  $r_{\text{vdw}}$  value to reproduce the steric effect of  $\text{PPh}_3$  ( $\theta = 165^\circ$ ) was calculated to be 2.51 Å according to the equations above. Similarly, the  $r_0$  and  $r_{\text{vdw}}$  values for reproducing  $\text{PPh}_3$  at the  $\omega\text{B97X-D/def2-SVP}$  level ( $\nu_{\text{CO}} = 2220.8 \text{ cm}^{-1}$  and  $\theta = 165^\circ$ ) were estimated to be 1.657 and 2.71 Å, respectively. The  $r_0$  and  $r_{\text{vdw}}$  values (Table S7) were used in the automated reaction path search calculation using the SC-AFIR method or the following path refinement using the LUP method at the corresponding computational level. In contrast, in Table S8, the  $r_0$  and  $r_{\text{vdw}}$  values corresponding to the grid points of the TEP and cone angle at the  $\omega\text{B97X-D/6-31+G(d)}$  level were listed. These values were not used in the manuscript but in Section 5.4 of the ESI to confirm the accuracy of this steric approximation used in **VL1**.

**Table S7.** The  $r_0$  and  $r_{\text{vdw}}$  values to reproduce electronic and steric effects of  $\text{PPh}_3$ .

|                                | $r_0$ (Å) | $d_{\text{PCl}^*}$ (Å) | $\angle \text{OPCl}^*$ (°) | $\frac{r_{\text{vdw}}}{\theta = 165^\circ (\text{PPh}_3)}$ (Å) | Usage   |
|--------------------------------|-----------|------------------------|----------------------------|----------------------------------------------------------------|---------|
| B3LYP/6-31G                    | 1.3       | 1.53                   | 106.7                      | 2.51                                                           | SC-AFIR |
| $\omega\text{B97X-D/def2-SVP}$ | 1.657     | 1.73                   | 112.6                      | 2.71                                                           | LUP     |

**Table S8.** The  $r_0$  and  $r_{\text{vdw}}$  values to perform a grid search of electronic and steric parameters (TEP and cone angle) at the  $\omega\text{B97X-D/6-31+G(d)}$  level.

| $r_0$ (Å) | $d_{\text{PCL}^*}$ (Å) | $\angle\text{OPCL}^*$ (°) | $r_{\text{vdw}}$ (Å) |                      |                      |                      |                      |
|-----------|------------------------|---------------------------|----------------------|----------------------|----------------------|----------------------|----------------------|
|           |                        |                           | $\theta = 120^\circ$ | $\theta = 140^\circ$ | $\theta = 160^\circ$ | $\theta = 180^\circ$ | $\theta = 200^\circ$ |
| 1.4       | 1.56                   | 108.6                     | 1.67                 | 2.10                 | 2.48                 | 2.78                 | 2.99                 |
| 1.6       | 1.69                   | 111.4                     | 1.72                 | 2.18                 | 2.58                 | 2.90                 | 3.13                 |
| 1.8       | 1.84                   | 114.2                     | 1.79                 | 2.28                 | 2.70                 | 3.03                 | 3.28                 |
| 2.0       | 2.01                   | 116.7                     | 1.86                 | 2.38                 | 2.82                 | 3.18                 | 3.45                 |
| 2.2       | 2.19                   | 118.6                     | 1.92                 | 2.47                 | 2.94                 | 3.33                 | 3.61                 |

The parameters of the 12-6 LJ potential were scaled based on the determined van der Waals radii of the  $\text{Cl}^*$  atoms. In the framework of the UFF, the nonbonding energy based on the 12-6 LJ potential is described as:

$$E_{\text{vdw}} = \varepsilon_{ij} \left[ \left( \frac{\sigma_{ij}}{r} \right)^{12} - 2 \left( \frac{\sigma_{ij}}{r} \right)^6 \right]$$

$$\varepsilon_{ij} = \sqrt{\varepsilon_i \varepsilon_j}$$

$$\sigma_{ij} = \sqrt{\sigma_i \sigma_j}$$

where the  $\varepsilon_{ij}$ ,  $\sigma_{ij}$  and  $r$  are the wall depth, van der Waals bond length, and distance between two atoms, respectively; the  $\varepsilon_i$  is the atomic van der Waals energy; and the  $\sigma_i$  is the van der Waals distance. Therefore, the steric interactions between the substrates and the  $\text{Cl}^*$  atoms in **VL1** can be described using the following equation:

$$V_{\text{L-S}} = \sum_{i \in \text{S}} \sum_{j=1}^3 \sqrt{\varepsilon_i \varepsilon_{\text{Cl}}} \left[ \left( \frac{\sqrt{\sigma_i \sigma_{\text{Cl}}}}{r_{ij}} \right)^{12} - 2 \left( \frac{\sqrt{\sigma_i \sigma_{\text{Cl}}}}{r_{ij}} \right)^6 \right]$$

where the  $r_{ij}$  is the distance between  $i$ th atom in the substrate (S) and  $j$ th  $\text{Cl}^*$  atom in **VL1**. To change the van der Waals radii of the  $\text{Cl}^*$  atom, the parameter  $\sigma_{\text{Cl}}$  was scaled by the ratio of the  $r_{\text{vdw}}$  required to reproduce the desired cone angle (Tables S7 and S8) to the original van der Waals radius of the Cl atom (1.75 Å).

#### 5.4 Performance of VL1

The performance of the virtual ligand **VL1** was validated computationally and compared with that of the original virtual ligand.<sup>S19</sup> Contour maps indicating the activation energy ( $\Delta E^\ddagger$ ) or the reaction energy ( $\Delta E$ ) of an intramolecular C–H activation from the aryl palladium **S1** were prepared using either the original virtual ligand or **VL1** (Fig. S8), following a previously reported procedure.<sup>S19</sup> The calculated values of  $\Delta E^\ddagger$  and  $\Delta E$  using real ligands (also reported in a previous study) were plotted on the corresponding contour maps (circles). Additionally, the values of  $\Delta E^\ddagger$  and  $\Delta E$  were predicted based on their TEP values and cone angles. The predicted values ( $\Delta E^\ddagger_{\text{virtual}}$  and  $\Delta E_{\text{virtual}}$ ) are plotted against the calculated values ( $\Delta E^\ddagger_{\text{real}}$  and  $\Delta E_{\text{real}}$ ), as shown on the right side of Fig. S8. For  $\Delta E^\ddagger$ , **VL1** (represented by orange dots) provided predictions of lower accuracy compared to the original virtual ligand (represented by blue dots). The mean absolute errors (MAE) for  $\Delta E^\ddagger$  were estimated to be 4.32 kcal/mol for the prediction by **VL1**, and 2.46 kcal/mol for the prediction based on the original

virtual ligand. However, qualitative correlations between predicted and calculated values of  $\Delta E^\ddagger$  were still high, and the coefficient of determination ( $R^2$ ) of the regression line (orange dotted line) was 0.74 (0.75 for the original virtual ligand, blue dotted line). In contrast, the prediction accuracy for  $\Delta E$  was improved by **VL1**, where the MAE was 1.43 kcal/mol for **VL1** and 2.15 kcal/mol for the original virtual ligand. Although **VL1** resulted in a slightly worse performance for the prediction of  $\Delta E^\ddagger$ , the problems derived from the cone potential (described in Section 5.3 of the ESI) can be mitigated. Therefore, we used **VL1** for the automated reaction path search calculations using the SC-AFIR method and the following path refinement calculations using the locally updated planes (LUP) method.

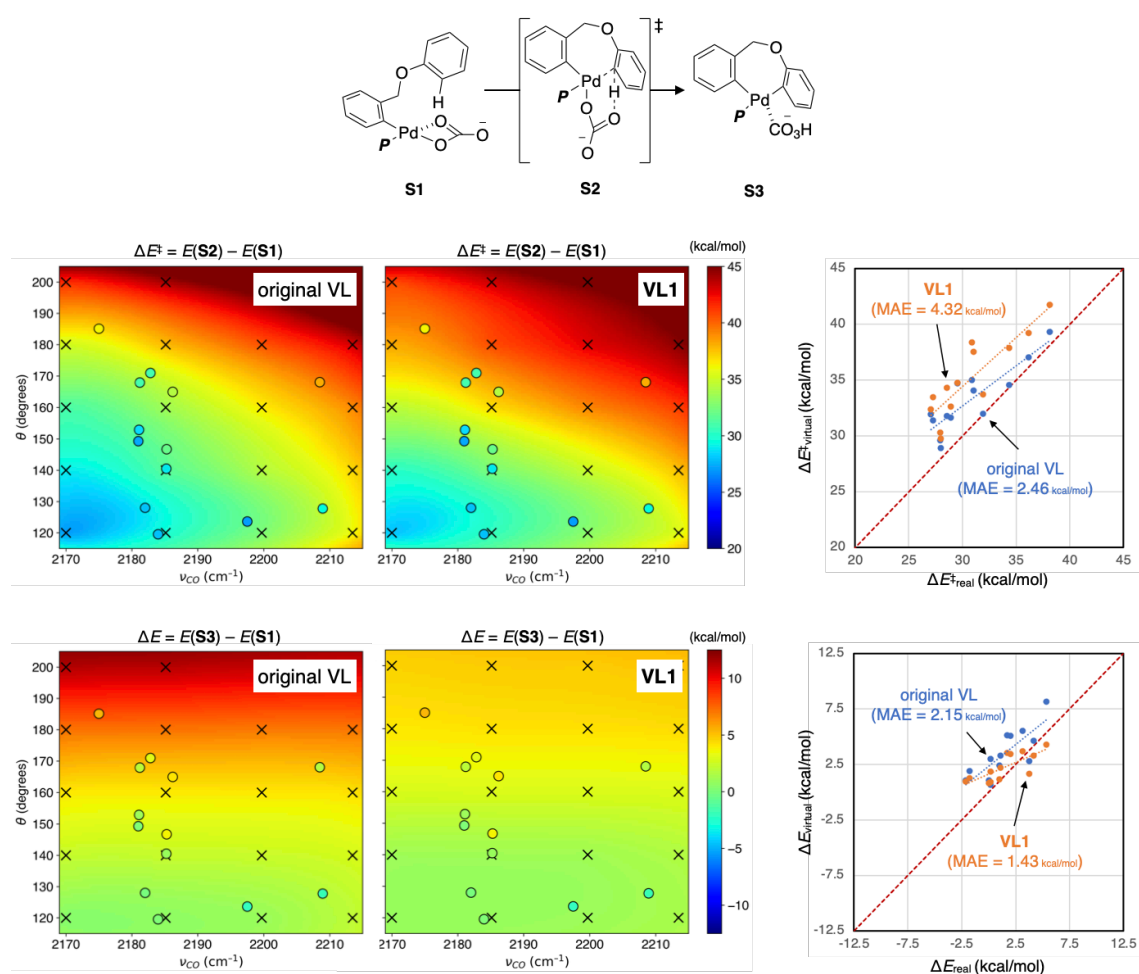

**Fig. S8.** Comparison of the performance between the original virtual ligand and the **VL1**.



## 5.5 Implementation of VL2<sub>PR3</sub> and VL2<sub>PAR3</sub>

In the parameter screening step of the VLA screening, we employed a modified version of the cone potential for steric approximation to improve accuracy. In the original version, the interactions between the virtual ligand and the substrates (L-S interactions) were described only by the repulsive term of the 12-6 LJ potential. In the modified version, the full 12-6 LJ potential, including the attractive term, is used as a potential function. The modified version of the cone potential can be formulated as follows. First, the energy arising from the cone potential is described as the sum of the L-S interaction energies ( $V_{L-S}$ ) and L-L interaction energies ( $V_{L-L}$ ). The apex of the cone is located 2.28 Å from the phosphorus atom of  $\text{PCl}_3^*$ , and its direction should be the same as that of the lone pair orbital of the phosphorus atom. Therefore, the coordinates of the apex ( $\mathbf{a} = (x_a, y_a, z_a)$ ) can be defined as:

$$\begin{aligned}\mathbf{a} &= \mathbf{p} - 2.28 \text{ (\AA)} \cdot \frac{(\mathbf{l}_1 - \mathbf{p}) + (\mathbf{l}_2 - \mathbf{p}) + (\mathbf{l}_3 - \mathbf{p})}{|(\mathbf{l}_1 - \mathbf{p}) + (\mathbf{l}_2 - \mathbf{p}) + (\mathbf{l}_3 - \mathbf{p})|} \\ &= \mathbf{p} - 2.28 \text{ (\AA)} \cdot \frac{\mathbf{l}_1 + \mathbf{l}_2 + \mathbf{l}_3 - 3\mathbf{p}}{|\mathbf{l}_1 + \mathbf{l}_2 + \mathbf{l}_3 - 3\mathbf{p}|}\end{aligned}$$

where  $\mathbf{p}$  and  $\mathbf{l}_i$  ( $i = 1-3$ ) are the Cartesian coordinates of the phosphorus and chlorine atoms in the virtual ligands, respectively. Using the Cartesian coordinates of the  $i$ th atom in substrate S ( $\mathbf{i} = (x_i, y_i, z_i)$ ,  $i \in S$ ), the  $V_{L-S}$  can be calculated as:

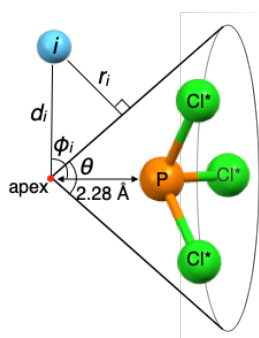

$$\begin{aligned}V_{L-S} &= \sum_{i \in S} 4\epsilon \left[ \left( \frac{\sigma}{r_i + a\sigma} \right)^{12} - \left( \frac{\sigma}{r_i + a\sigma} \right)^6 \right] \\ r_i &= \begin{cases} d_i \sin\left(\phi_i - \frac{\theta}{2}\right) & \left(\phi_i - \frac{\theta}{2} \leq \frac{\pi}{2}\right) \\ d_i & \left(\phi_i - \frac{\theta}{2} > \frac{\pi}{2}\right) \end{cases} \\ d_i &= |\mathbf{i} - \mathbf{a}| \\ \phi_i &= \arccos\left(\frac{(\mathbf{p} - \mathbf{a}) \cdot (\mathbf{i} - \mathbf{a})}{|\mathbf{p} - \mathbf{a}| |\mathbf{i} - \mathbf{a}|}\right)\end{aligned}$$

where  $\theta$  denotes the apex angle of the cone potential (cone angle). The constants  $\epsilon$ ,  $\sigma$ , and  $a$  were determined based on  $\text{He}_8$ \_steric and related steric descriptors.  $\text{He}_8$ \_steric, which was proposed by Fey *et al.*,<sup>S20</sup> is defined by the interaction energy ( $E_{ster}$ ) between a phosphorus(III) ligand and a ring of eight helium atoms. The helium atoms were arranged in regular positions in a circle with a radius of 2.5 Å, while the phosphorus atom in the ligand was fixed at a distance of 2.28 Å from the center of the ring (Fig. S9a,  $l = 2.28$  Å). Previous research by Fey *et al.*,<sup>S20</sup> used the BP86 functional, which does not include dispersion term. In this study, we calculated the  $\text{He}_8$ \_steric of 30 phosphine ligands using the  $\omega\text{B97X-D}$  functional (the  $\omega\text{B97X-D/def2-SV(P)}$  level), which includes dispersion term, to properly evaluate the attractive steric effect of the real ligands. Additionally, we calculated related steric descriptors, in which the phosphorus atom in each ligand was fixed at 2.78 or 3.28 Å (Fig. S9a,  $l = 2.78$  or 3.28 Å) from the center of the ring. The calculated values for each ligand correlated well with the cone angle, as shown in Fig. S9c (left, dots). In contrast, the interaction energy ( $E_{ster}$ ) between a virtual ligand and a ring of eight helium atoms can be numerically calculated, as shown in Fig. S9b. The constants  $\epsilon$ ,  $\sigma$ , and  $a$  were optimized using a grid search,

such that the relationship between  $E_{ster}$  and  $\theta$  of the cone potential (Fig. S9b) reproduced the correlation between  $E_{ster}$  and  $\theta$  in real systems (Fig. S9c, left). The grid search was performed with  $\epsilon$  values in the range of 0–10 kcal/mol with 0.01 kcal/mol step width,  $\sigma$  values in the range of 0–20 Å with 0.01 Å step width, and  $a$  values in the range of 0–2 with 0.01 step width. The optimal values for  $\epsilon$ ,  $\sigma$ , and  $a$  were 0.41 kcal/mol, 13.84 Å, and 0.93, respectively. The plot of  $E_{ster}$  against  $\theta$  for the cone potential with these optimal constants is shown in Fig. S9c (left, solid lines). The calculated values of  $E_{ster}$  for real ligands and the values predicted by the optimized cone potential exhibited a strong correlation with a coefficient of determination ( $R^2$ ) of 0.84 (Fig. S9c, right). The structures of the real ligands and the calculated values of  $E_{ster}$  are listed in Table S9.

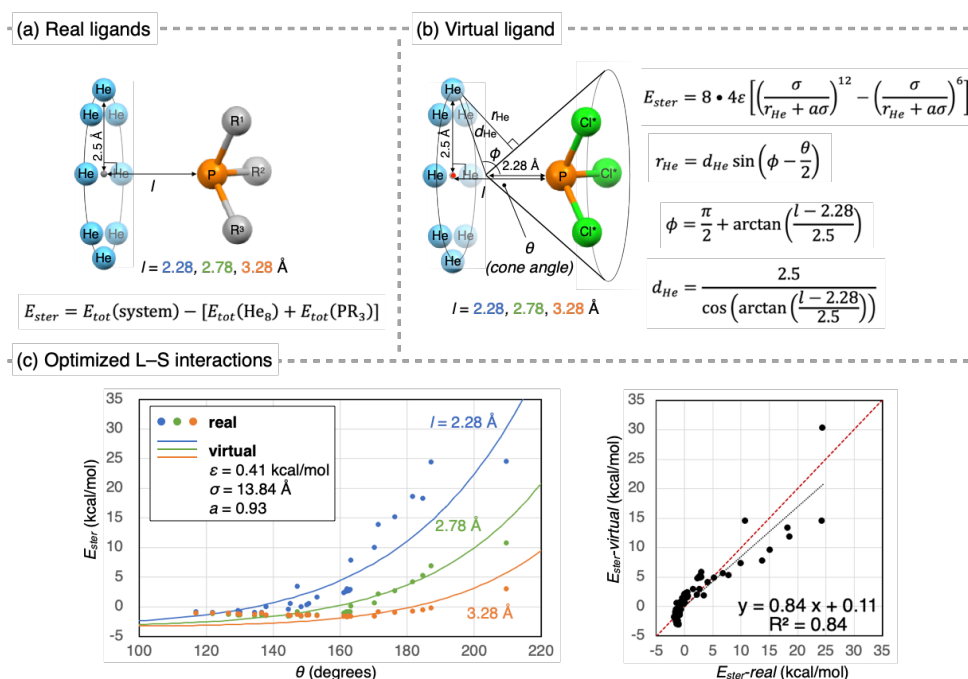

**Fig. S9.** He<sub>8</sub> steric and related steric descriptors. (a) Definition of descriptors for real ligands. (b) Expected steric interactions between the He<sub>8</sub> ring and the cone potential. (c) Comparison between real and optimized virtual systems.

**Table S9.** Cone angle and calculated interaction energies ( $E_{ster}$ ) for real ligands.

| Ligand                                                                     | $\theta$ (degrees) | $E_{ster}$ (kcal/mol)  |                        |                        |
|----------------------------------------------------------------------------|--------------------|------------------------|------------------------|------------------------|
|                                                                            |                    | $l = 2.28 \text{ \AA}$ | $l = 2.78 \text{ \AA}$ | $l = 3.28 \text{ \AA}$ |
| PMe <sub>3</sub>                                                           | 117                | -0.8                   | -1.1                   | -1.1                   |
| PEt <sub>3</sub>                                                           | 150                | 0.3                    | -1.4                   | -1.4                   |
| P(CF <sub>3</sub> ) <sub>3</sub>                                           | 137                | -1.0                   | -1.4                   | -1.1                   |
| P(CCl <sub>3</sub> ) <sub>3</sub>                                          | 171                | 13.8                   | 2.2                    | -0.9                   |
| PPh <sub>3</sub>                                                           | 162                | 2.7                    | -0.9                   | -1.6                   |
| P <sup>t</sup> Bu <sub>3</sub>                                             | 187                | 24.3                   | 6.9                    | -0.2                   |
| P( <i>p</i> -OMeC <sub>6</sub> H <sub>4</sub> ) <sub>3</sub>               | 163                | 2.8                    | -0.8                   | -1.6                   |
| P( <i>p</i> -NMe <sub>2</sub> C <sub>6</sub> H <sub>4</sub> ) <sub>3</sub> | 163                | 2.8                    | -0.8                   | -1.6                   |
| P( <i>p</i> -FC <sub>6</sub> H <sub>4</sub> ) <sub>3</sub>                 | 163                | 2.7                    | -0.9                   | -1.6                   |
| P( <i>p</i> -ClC <sub>6</sub> H <sub>4</sub> ) <sub>3</sub>                | 162                | 2.5                    | -1.0                   | -1.6                   |
| P( <i>p</i> -CF <sub>3</sub> C <sub>6</sub> H <sub>4</sub> ) <sub>3</sub>  | 161                | 2.3                    | -1.0                   | -1.6                   |
| P( <i>o</i> -tol) <sub>3</sub>                                             | 210                | 24.4                   | 10.7                   | 3.0                    |
| PMe(CCl <sub>3</sub> ) <sub>2</sub>                                        | 147                | 3.4                    | -0.8                   | -1.3                   |
| PMe(CF <sub>3</sub> ) <sub>2</sub>                                         | 127                | -1.1                   | -1.3                   | -1.1                   |
| PMe <sub>2</sub> (CCl <sub>3</sub> )                                       | 130                | -0.7                   | -1.4                   | -1.2                   |
| PMe <sub>2</sub> (CF <sub>3</sub> )                                        | 122                | -1.0                   | -1.2                   | -1.1                   |
| PMe <sub>2</sub> Ph                                                        | 130                | -0.9                   | -1.4                   | -1.3                   |
| PMe <sup>t</sup> Bu                                                        | 138                | 0.0                    | -1.6                   | -1.4                   |
| PMe(Ph)(CF <sub>3</sub> )                                                  | 135                | -0.9                   | -1.5                   | -1.3                   |
| PMePh <sub>2</sub>                                                         | 145                | -0.4                   | -1.6                   | -1.4                   |
| PMe( <sup>t</sup> Bu)(CF <sub>3</sub> )                                    | 145                | 0.6                    | -1.5                   | -1.5                   |
| PMe <sup>t</sup> Bu <sub>2</sub>                                           | 163                | 7.8                    | 0.1                    | -1.6                   |
| PPh(CF <sub>3</sub> ) <sub>2</sub>                                         | 151                | 0.6                    | -1.3                   | -1.4                   |
| PPh <sub>2</sub> (CF <sub>3</sub> )                                        | 149                | -0.1                   | -1.6                   | -1.5                   |
| P <sup>t</sup> Bu(CCl <sub>3</sub> ) <sub>2</sub>                          | 176                | 15.1                   | 2.6                    | -1.0                   |
| P <sup>t</sup> Bu(CF <sub>3</sub> ) <sub>2</sub>                           | 153                | 1.6                    | -1.5                   | -1.5                   |
| P <sup>t</sup> BuPh <sub>2</sub>                                           | 162                | 3.0                    | -1.4                   | -1.8                   |
| P <sup>t</sup> Bu <sub>2</sub> (CCl <sub>3</sub> )                         | 182                | 18.6                   | 4.1                    | -0.8                   |
| P <sup>t</sup> Bu <sub>2</sub> (CF <sub>3</sub> )                          | 170                | 10.0                   | 0.7                    | -1.6                   |
| P <sup>t</sup> Bu <sub>2</sub> Ph                                          | 185                | 18.2                   | 5.2                    | -0.6                   |

The  $V_{L-L}$  term, which describes L-L interactions, was also modified. To describe L-L interactions, the interaction between two virtual ligands must be considered (Fig. S10, top). However, this interaction is more complex to implement compared to the L-S interaction because it depends on the distance between the ligands and their relative orientation. To simplify the modeling of the L-L interaction in the cone potential, we considered the interaction between one cone (e.g., a cone containing a  $P_i$  atom) and the phosphorus atom of another virtual ligand ( $P_j$ ) rather than considering two cones (Fig. S10, bottom). As  $P_j$  is located inside the cone, which is subjected to the L-L interaction, this evaluation underestimates the strength of the L-L interaction. To address this systematic error in the original version of the cone potential, a larger cone with an apex angle of  $1.7\theta$  (where  $\theta$  is the apex angle of the original cone) was defined (dotted line, Fig. S10, bottom left). The larger cone shared the same apex and axis as the original cone. The L-L interaction was estimated using the distance between a phosphorus atom and the newly defined cone ( $r_{ij}'$  and  $r_{ji}'$ ) under the potential function optimized for the L-S interaction. In the modified version of the cone potential, a new potential function was prepared to more accurately describe the L-L interactions of real ligands (Fig. S10, bottom right). This new potential function was used to estimate the L-L interactions using the distance between a phosphorus atom and the original cone ( $r_{ij}$  and  $r_{ji}$ ), rather than attempting to correct the systematic error through modification of the cone angle. The 12-6 LJ potential was used as the potential function for the L-L interactions.

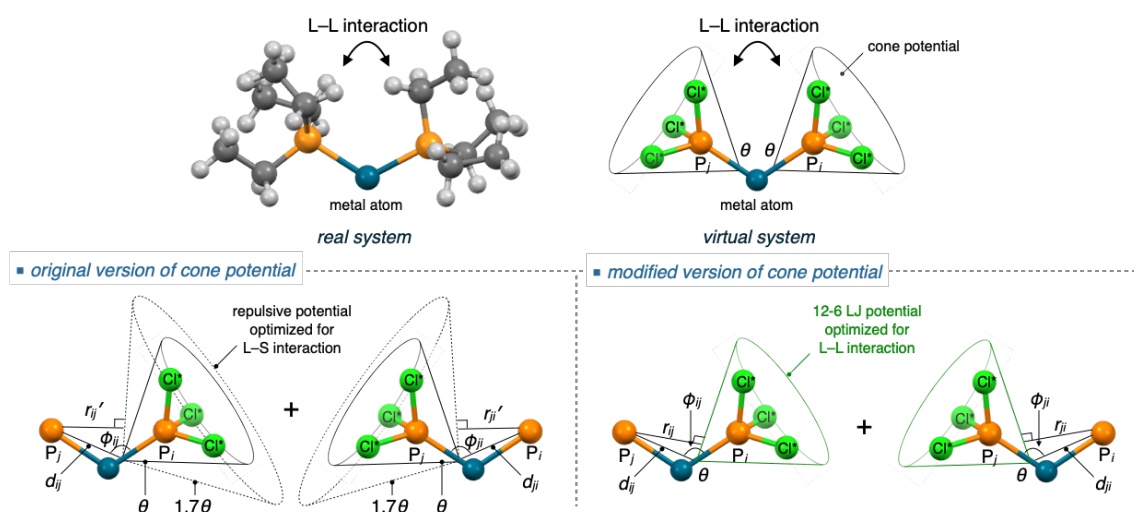

**Fig. S10.** Approximation of ligand-ligand (L-L) interactions. Interaction between two real ligands (top left), interaction between two virtual ligands (top right), simplified model in the original version (bottom left), and the modified version (bottom right) of the cone potential.

The  $V_{L-L}$  term of the modified cone potential can be calculated as follows:

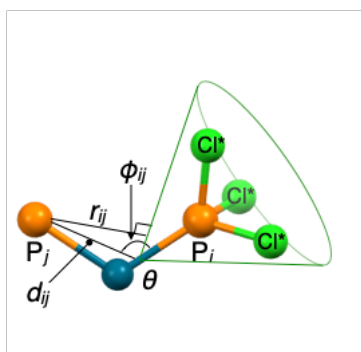

$$V_{L-L} = \sum_{i \in P_{\text{virt}}} \sum_{j \in P_{\text{virt}}, i \neq j} \frac{1}{2} \cdot 4\epsilon' \left[ \left( \frac{\sigma'}{r_{ij} + a'\sigma'} \right)^{12} - \left( \frac{\sigma'}{r_{ij} + a'\sigma'} \right)^6 \right]$$

$$r_{ij} = \begin{cases} d_{ij} \sin\left(\phi_{ij} - \frac{\theta}{2}\right) & \left(\phi_{ij} - \frac{\theta}{2} \leq \frac{\pi}{2}\right) \\ d_{ij} & \left(\phi_{ij} - \frac{\theta}{2} > \frac{\pi}{2}\right) \end{cases}$$

$$d_{ij} = |\mathbf{p}_j - \mathbf{a}_i|$$

$$\phi_{ij} = \arccos\left(\frac{(\mathbf{p}_i - \mathbf{a}_i) \cdot (\mathbf{p}_j - \mathbf{a}_i)}{|\mathbf{p}_i - \mathbf{a}_i| |\mathbf{p}_j - \mathbf{a}_i|}\right)$$

where  $\theta$  is the apex angle of the cone potential (cone angle),  $\mathbf{p}_i$  is the Cartesian coordinate of the phosphorus atom in the  $i$ th virtual ligand, and  $\mathbf{a}_i$  is the Cartesian coordinate of the cone apex for the  $i$ th virtual ligand. The constants  $\epsilon'$ ,  $\sigma'$ , and  $a'$  were determined based on the L-L interactions of the real ligands sampled in Section 4 of the ESI (Table S6). To optimize the constants  $\epsilon'$ ,  $\sigma'$ , and  $a'$  in the new potential function for the L-L interaction, the interaction energy between two virtual ligands ( $E_{L-L}$ ) in a geometry given in Fig. S4a was numerically calculated, as shown in Fig. S11a. We performed a grid search to determine the values for these constants that reproduced the observed correlation between  $E_{L-L}$ ,  $\theta$  and  $\phi$  in real systems (Fig. S5). A grid search was performed for  $\epsilon'$  values in the range of 0–10 kcal/mol with 0.01 kcal/mol step width, for  $\sigma'$  values in the range of 0–20 Å with 0.01 Å step width, and for  $a'$  values in the range of 0–2 with 0.01 step width. The optimal values of the constants  $\epsilon'$ ,  $\sigma'$ , and  $a'$  were 0.81 kcal/mol, 5.56 Å, and 0.69 for the L-L interactions of PR<sub>3</sub>, and 7.4 kcal/mol, 7.82 Å, and 0.99 for the L-L interactions of PAr<sub>3</sub>, respectively. Fig. S11b shows the plots of  $E_{L-L}$  against  $\theta$  and  $\phi$  with optimal constants.

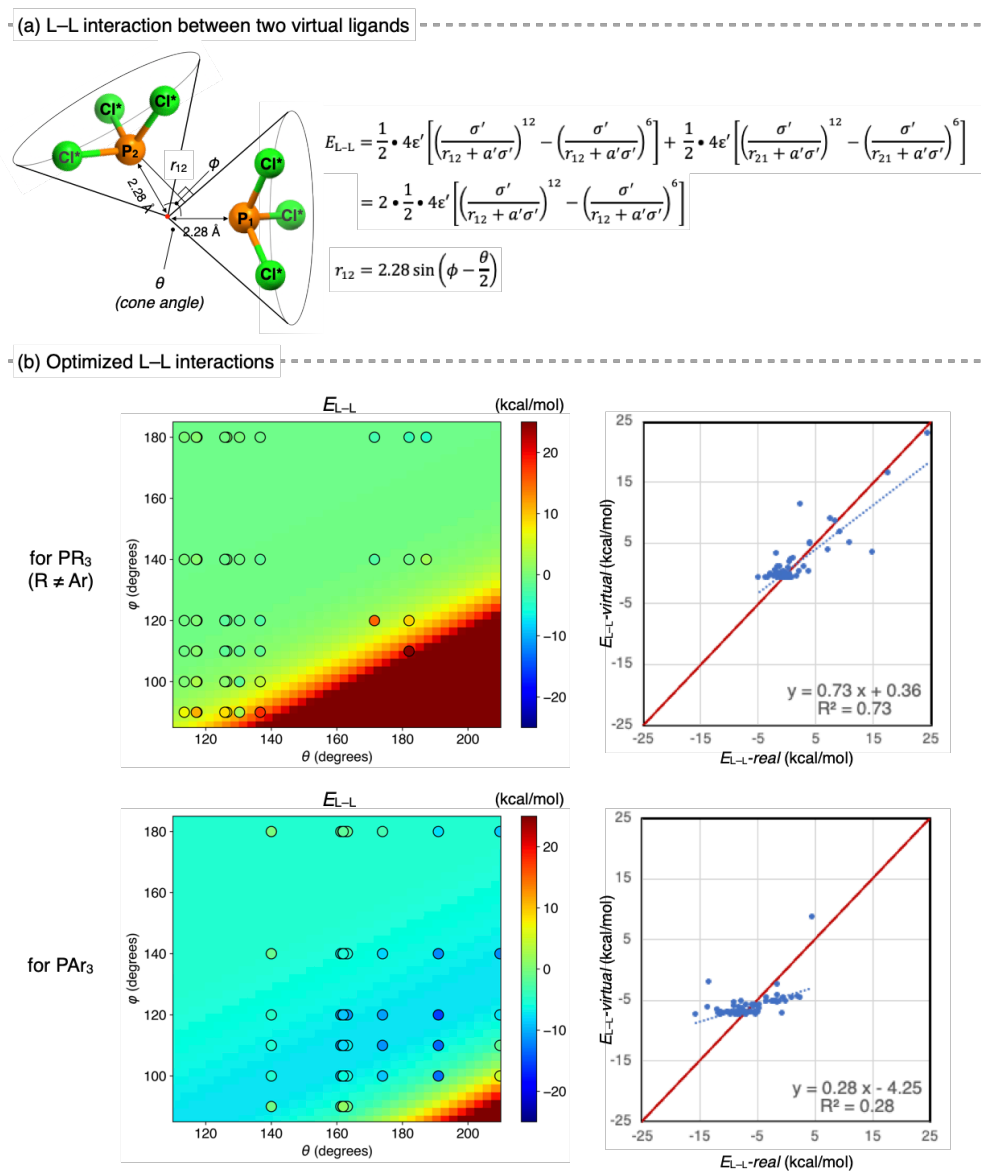

**Fig. S11.** Optimization of the 12-6 LJ potential for ligand-ligand (L-L) interactions. (a) Expected interaction energies between two virtual ligands in a given geometry. (b) Comparison between real and optimized virtual systems.

The energy arising from the cone potential was calculated as the sum of the energies described by the optimized  $V_{L-S}$  and  $V_{L-L}$  potentials. The gradient vector and Hessian matrix arising from the cone potential were calculated as partial derivatives.

## 5.6 Performance of VL2<sub>PR3</sub> and VL2<sub>PAr3</sub>

The performance of the newly developed virtual ligands **VL2<sub>PR3</sub>** and **VL2<sub>PAr3</sub>** was validated computationally and compared with the original virtual ligand.<sup>S19</sup> Contour maps, which indicate the activation energy ( $\Delta E^\ddagger$ ) or the reaction energy ( $\Delta E$ ) of an intramolecular C-H activation from the aryl palladium **S1**, were prepared using either the original virtual ligand or **VL2<sub>PR3</sub>** (Fig. S12), following a previously reported procedure<sup>S19</sup>. The calculated values of  $\Delta E^\ddagger$  and  $\Delta E$  using real ligands (also reported in a previous study) were plotted on the corresponding contour maps (circles). The values of  $\Delta E^\ddagger$  and  $\Delta E$  were then predicted based on their TEP values and cone angles. The predicted values ( $\Delta E^\ddagger_{\text{virtual}}$  and  $\Delta E_{\text{virtual}}$ ) are plotted against the calculated values ( $\Delta E^\ddagger_{\text{real}}$  and  $\Delta E_{\text{real}}$ ), as shown on the right side of Fig. S12. For  $\Delta E^\ddagger$  and  $\Delta E$ , the values predicted using the contour map prepared by **VL2<sub>PR3</sub>** (shown by orange dots) were closer to the calculated values using real ligands compared to the values predicted by the original virtual ligand (shown by blue dots). The mean absolute errors (MAE) for  $\Delta E^\ddagger$  and  $\Delta E$  were 1.79 and 1.21 kcal/mol for values predicted based on **VL2<sub>PR3</sub>**, and 2.46 and 2.15 kcal/mol for ones based on the original virtual ligand, indicating a significant improvement in the prediction performance. The prediction using **VL2<sub>PAr3</sub>** should give the same results as **VL2<sub>PR3</sub>** because only one virtual ligand exists in the system and **VL2<sub>PAr3</sub>** is essentially identical to **VL2<sub>PR3</sub>**, except for the description of L-L interactions.

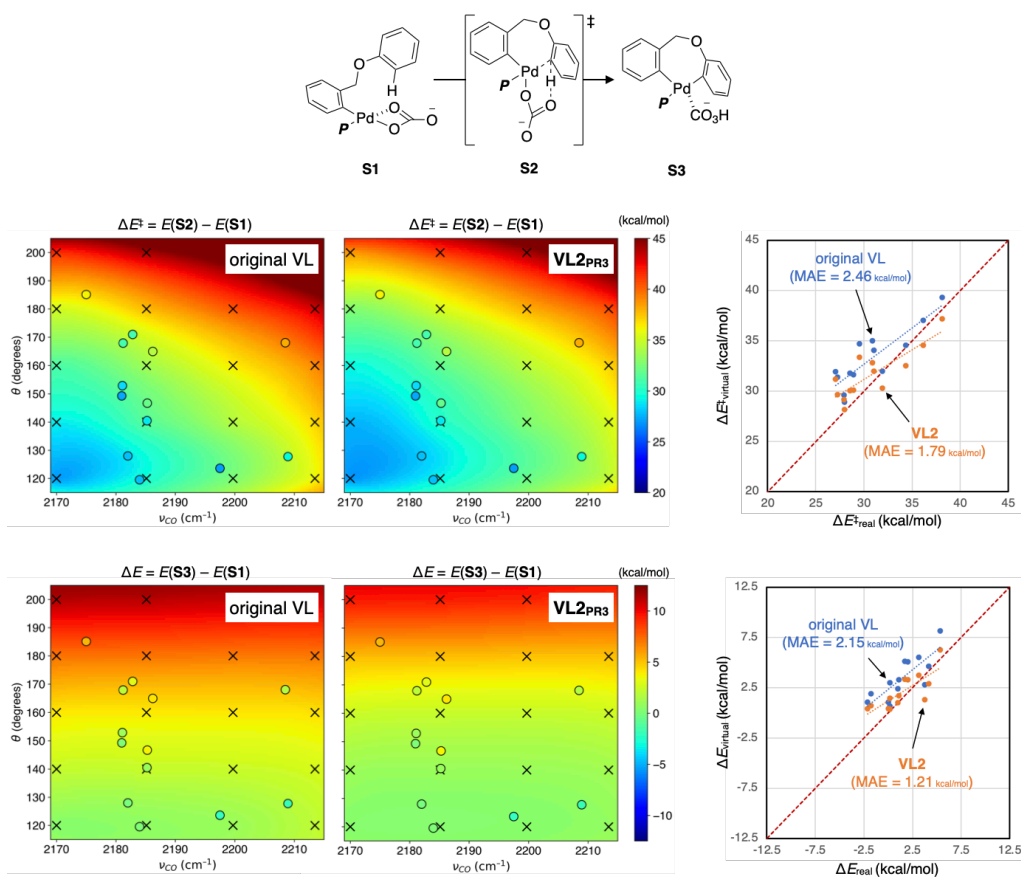

**Fig. S12.** Comparison of the performance between the original virtual ligand and the VL2.

To further verify the prediction abilities of **VL2**, the insertion of ethylene from rhodium complex **S4** was also calculated. According to a previously reported procedure,<sup>S19</sup> contour maps were generated to show the  $\Delta E^\ddagger$  and  $\Delta E$  of the reaction. In this case, three types of virtual ligands were used (the original version, **VL2<sub>PR3</sub>**, and **VL2<sub>PAr3</sub>**), and six contour maps were prepared. The calculated values of  $\Delta E^\ddagger$  and  $\Delta E$  using real ligands (reported in a previous report) were plotted on the contour maps (circles). While all ligands were uniformly plotted on the contour maps prepared by the original version of the virtual ligand, for the contour maps prepared by **VL2<sub>PR3</sub>** and **VL2<sub>PAr3</sub>**, each ligand was classified as PR<sub>3</sub>-type or PAr<sub>3</sub>-type based on its chemical structure and plotted on the corresponding contour maps. Fig. S13 (right side) shows the plot of the predicted energies ( $\Delta E^\ddagger_{\text{virtual}}$  and  $\Delta E_{\text{virtual}}$ ) against the calculated values ( $\Delta E^\ddagger_{\text{real}}$  and  $\Delta E_{\text{real}}$ ). The values predicted by **VL2<sub>PR3</sub>** and **VL2<sub>PAr3</sub>** were combined and indicated as **VL2** (orange dots). For the prediction of  $\Delta E^\ddagger$ , the MAEs were 0.82 kcal/mol for the original version and 0.85 kcal/mol for **VL2**, indicating excellent prediction performance in both cases. However, the prediction performance of **VL2** for  $\Delta E$  was significantly better than that of the original version, with MAEs of 2.57 kcal/mol for the original version and 2.07 kcal/mol for **VL2**.

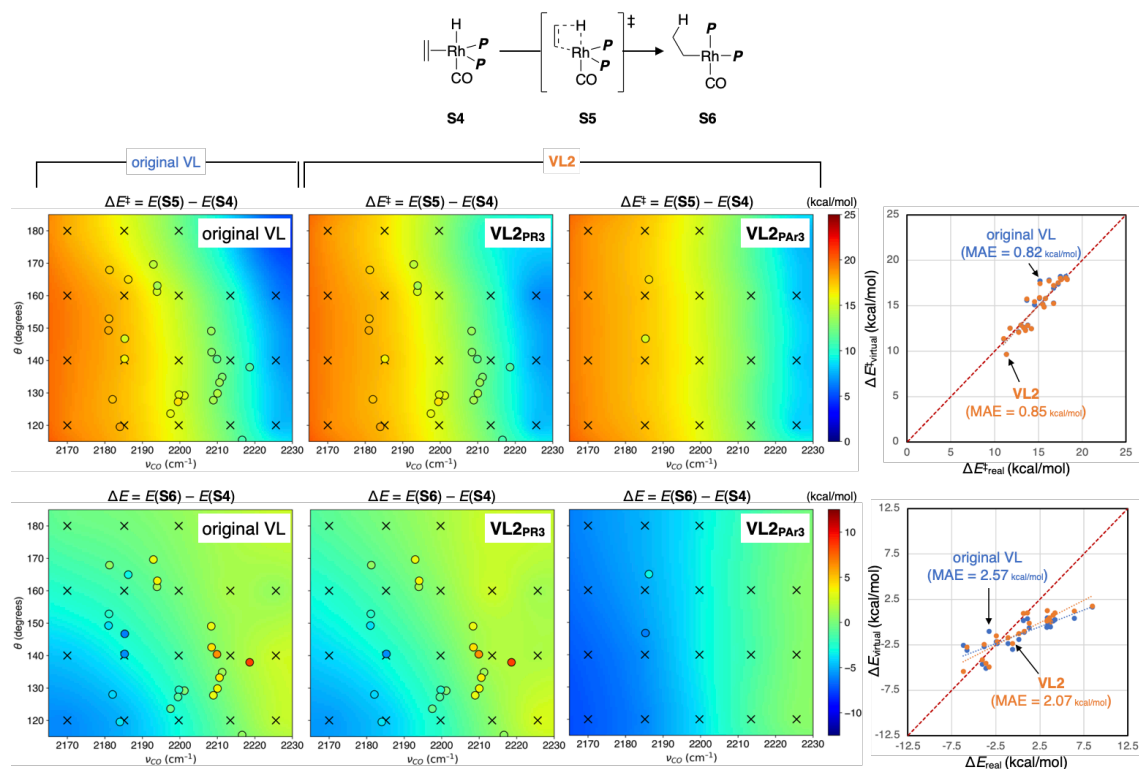

**Fig. S13.** Comparison of the performance between the original virtual ligand and the **VL2** in the insertion of ethylene from Rh complex **S4**.

Based on these results (Figs. S12 and S13), we concluded that the modified version of the virtual ligands **VL2<sub>PR3</sub>** and **VL2<sub>PAr3</sub>** would be more accurate for describing phosphine ligands compared to the original version of the virtual ligand. This is likely due to the improved descriptions of attractive L-S interactions and the optimized potential functions for L-L interactions in the modified version.



## 6. Supplemental references

- S1. Gaussian 16, Revision C.01, M. J. Frisch, G. W. Trucks, H. B. Schlegel, G. E. Scuseria, M. A. Robb, J. R. Cheeseman, G. Scalmani, V. Barone, G. A. Petersson, H. Nakatsuji, X. Li, M. Caricato, A. V. Marenich, J. Bloino, B. G. Janesko, R. Gomperts, B. Mennucci, H. P. Hratchian, J. V. Ortiz, A. F. Izmaylov, J. L. Sonnenberg, D. Williams-Young, F. Ding, F. Lipparini, F. Egidi, J. Goings, B. Peng, A. Petrone, T. Henderson, D. Ranasinghe, V. G. Zakrzewski, J. Gao, N. Rega, G. Zheng, W. Liang, M. Hada, M. Ehara, K. Toyota, R. Fukuda, J. Hasegawa, M. Ishida, T. Nakajima, Y. Honda, O. Kitao, H. Nakai, T. Vreven, K. Throssell, J. A. Montgomery, Jr., J. E. Peralta, F. Ogliaro, M. J. Bearpark, J. J. Heyd, E. N. Brothers, K. N. Kudin, V. N. Staroverov, T. A. Keith, R. Kobayashi, J. Normand, K. Raghavachari, A. P. Rendell, J. C. Burant, S. S. Iyengar, J. Tomasi, M. Cossi, J. M. Millam, M. Klene, C. Adamo, R. Cammi, J. W. Ochterski, R. L. Martin, K. Morokuma, O. Farkas, J. B. Foresman and D. J. Fox, Gaussian, Inc., Wallingford CT, 2016.
- S2. F. Neese, F. Wennmohs, U. Becker and C. Riplinger, *J. Chem. Phys.*, 2020, **152**, 224108.
- S3. S. Maeda, Y. Harabuchi, M. Takagi, K. Saita, K. Suzuki, T. Ichino, Y. Sumiya, K. Sugiyama and Y. Ono, *J. Comput. Chem.*, 2018, **39**, 233–250.
- S4. R. F. Ribeiro, A. V. Marenich, C. J. Cramer and D. G. Truhlar, *J. Phys. Chem. B*, 2011, **115**, 14556–14562.
- S5. R. L. Martin, P. J. Hay and L. R. Pratt, *J. Phys. Chem. A*, 1998, **102**, 3565–3573.
- S6. For selected examples, see: (a) Y. Liu, Y. Tang, Y.-Y. Jiang, X. Zhang, P. Li and S. Bi, *ACS Catal.*, 2017, **7**, 1886–1896; (b) P.-P. Chen, E. L. Lucas, M. A. Greene, S.-Q. Zhang, E. J. Tollefson, L. W. Erickson, B. L. H. Taylor, E. R. Jarvo and X. Hong, *J. Am. Chem. Soc.*, 2019, **141**, 5835–5855.
- S7. (a) S. Grimme, C. Bannwarth and P. Shushkov, *J. Chem. Theory Comput.*, 2017, **13**, 1989–2009; (b) D. Grimme and C. Bannwarth, *J. Chem. Phys.*, 2016, **145**, 054103.
- S8. C. A. Tolman, *Chem. Rev.*, 1977, **77**, 313–348.
- S9. L. Perrin, E. Clot, O. Eisenstein, J. Loch and R. H. Crabtree, *Inorg. Chem.*, 2001, **40**, 5806–5811.
- S10. T. Gensch, G. dos Passos Gomes, P. Friederich, E. Peters, T. Gaudin, R. Pollice, K. Jorner, A. Nigam, M. Lindner-D'Addario, M. S. Sigman and A. Aspuru-Guzik, *J. Am. Chem. Soc.*, 2022, **144**, 1205–1217.
- S11. C. Choi and R. Elber, *J. Chem. Phys.*, 1991, **94**, 751–760.
- S12. Y. Sumiya and S. Maeda, *Chem. Lett.*, 2020, **49**, 553–564.
- S13. Y. Sumiya and S. Maeda, *Chem. Lett.*, 2019, **48**, 47–50.
- S14. A. V. Marenich, C. J. Cramer and D. G. Truhlar, *J. Phys. Chem. B*, 2009, **113**, 6378–6396.
- S15. L. J. Gooßen, P. P. Lange, N. Rodríguez and D. Linder, *Chem.–Eur. J.*, 2010, **16**, 3906–3909.
- S16. L. Chen, P. Ren and B. P. Carrow, *J. Am. Chem. Soc.*, 2016, **138**, 6392–6395.
- S17. F. Rampf and H.-C. Militzer, EP1354886A1, October 22, 2003.
- S18. A. K. Rappé, C. J. Casewit, K. S. Colwell and W. M. Skiff, *J. Am. Chem. Soc.*, 1992, **114**, 10024–10035.
- S19. W. Matsuoaka, Y. Harabuchi and S. Maeda, *ACS Catal.*, 2022, **12**, 3752–3766.
- S20. N. Fey, A. C. Tspis, S. E. Harris, J. N. Harvey, A. G. Orpen and R. A. Mansson, *Chem.–Eur. J.*, 2006, **12**, 291–302.

## 7. GC spectra

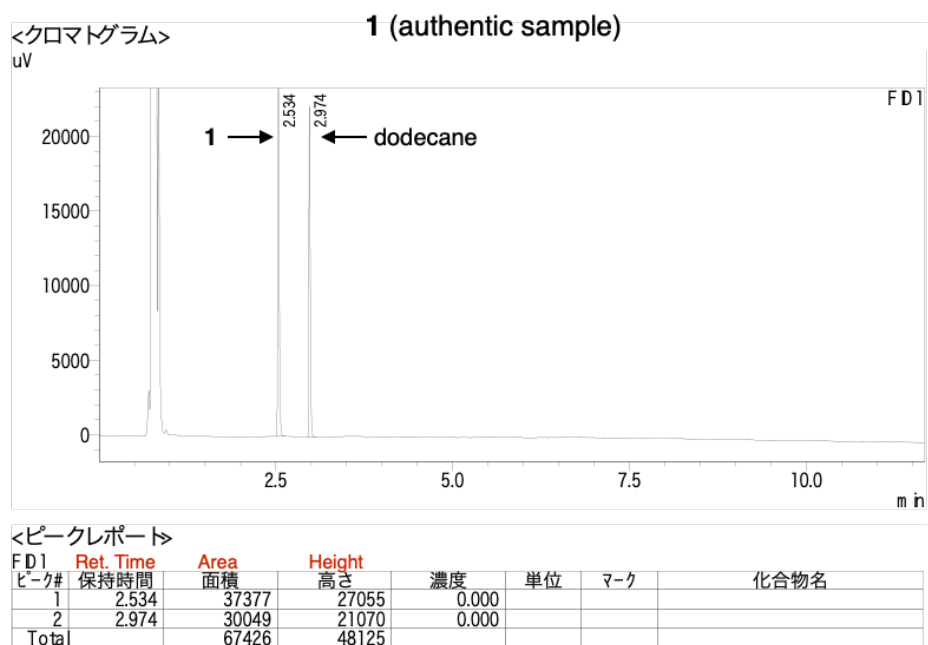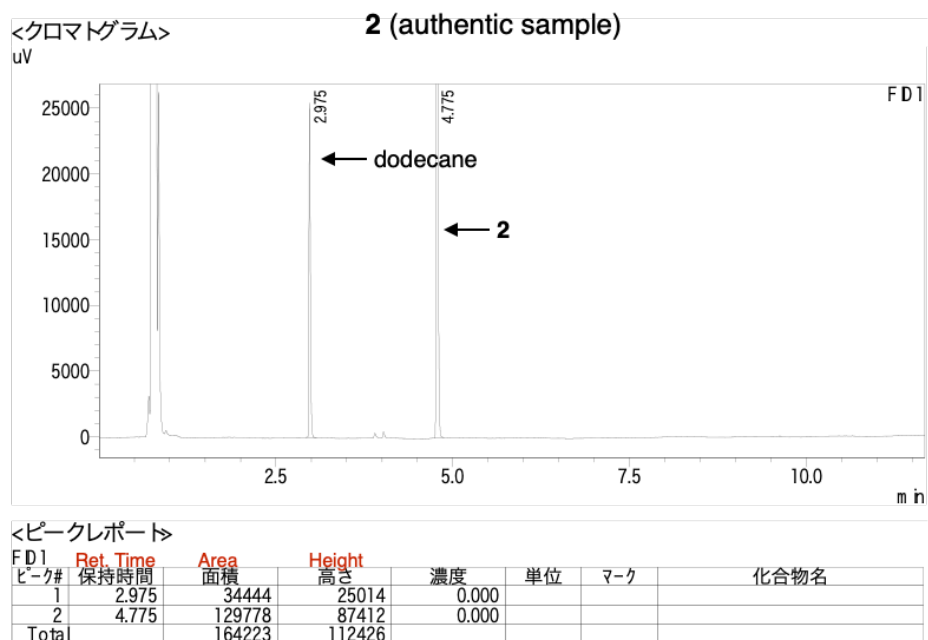

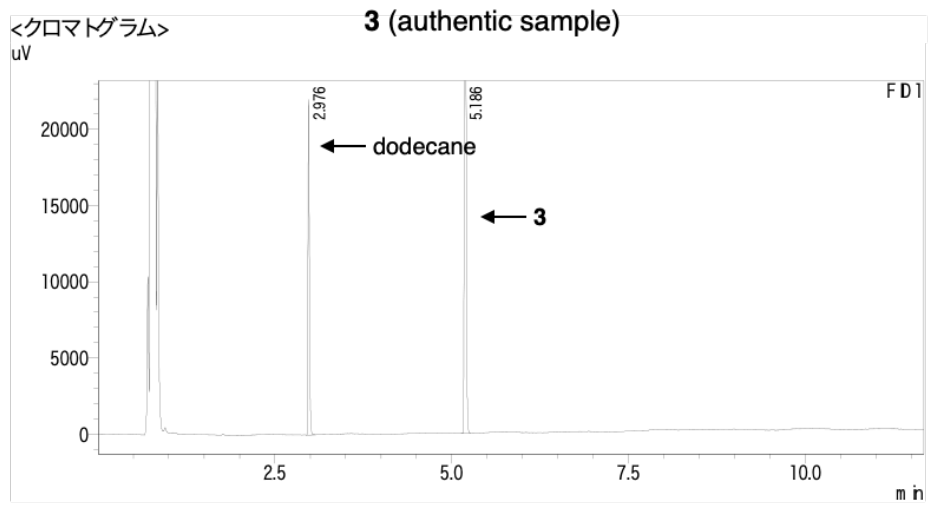

<ピークレポート>

| ピーク#  | Ret. Time<br>保持時間 | Area<br>面積 | Height<br>高さ | 濃度    | 単位 | マーク | 化合物名 |
|-------|-------------------|------------|--------------|-------|----|-----|------|
| 1     | 2.976             | 29809      | 21650        | 0.000 |    |     |      |
| 2     | 5.186             | 100041     | 68485        | 0.000 |    |     |      |
| Total |                   | 129850     | 90134        |       |    |     |      |

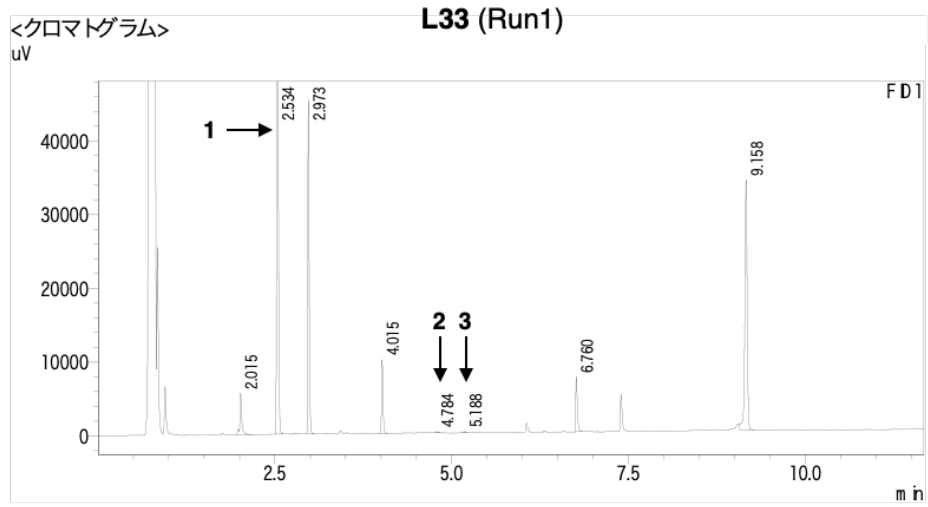

<ピークレポート>

| FD1   | Ret. Time | Area   | Height | 濃度     | 単位 | マーク | 化合物名 |
|-------|-----------|--------|--------|--------|----|-----|------|
| ピーク#  | 保持時間      | 面積     | 高さ     |        |    |     |      |
| 1     | 2.015     | 10535  | 5575   | 3.400  |    |     |      |
| 2     | 2.534     | 133873 | 97224  | 43.209 |    |     |      |
| 3     | 2.973     | 61057  | 44142  | 19.707 |    |     |      |
| 4     | 4.015     | 14141  | 9751   | 4.564  |    |     |      |
| 5     | 4.784     | 295    | 172    | 0.095  |    | M   |      |
| 6     | 5.188     | 309    | 192    | 0.100  |    | M   |      |
| 7     | 6.760     | 12166  | 7369   | 3.927  |    |     |      |
| 8     | 9.158     | 77447  | 33754  | 24.997 |    | V   |      |
| Total |           | 309824 | 198177 |        |    |     |      |

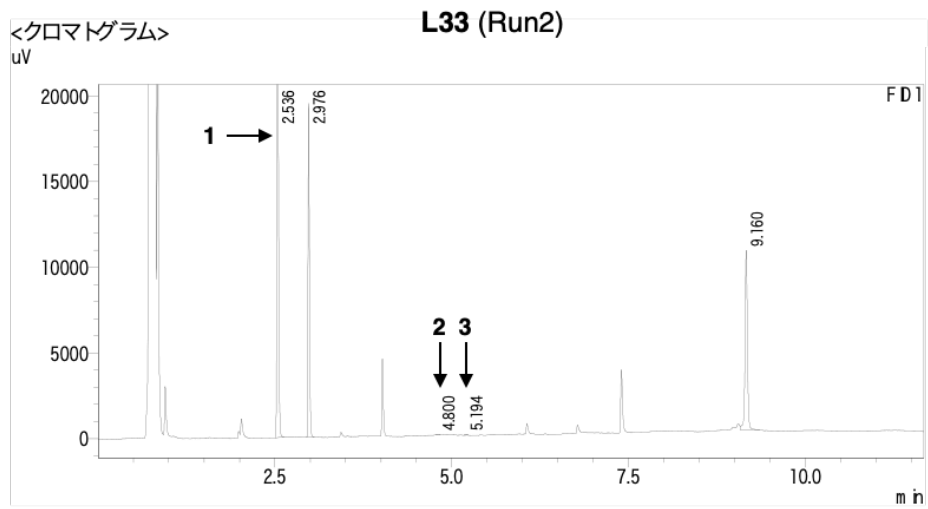

<ピークレポート>

| FD1   | Ret. Time | Area   | Height | 濃度     | 単位 | マーク | 化合物名 |
|-------|-----------|--------|--------|--------|----|-----|------|
| ピーク#  | 保持時間      | 面積     | 高さ     |        |    |     |      |
| 1     | 2.536     | 57169  | 40923  | 52.776 |    |     |      |
| 2     | 2.976     | 26556  | 19246  | 24.515 |    |     |      |
| 3     | 4.800     | 77     | 38     | 0.071  |    | M   |      |
| 4     | 5.194     | 92     | 60     | 0.085  |    | M   |      |
| 5     | 9.160     | 24431  | 10447  | 22.553 |    | V   |      |
| Total |           | 108326 | 70714  |        |    |     |      |

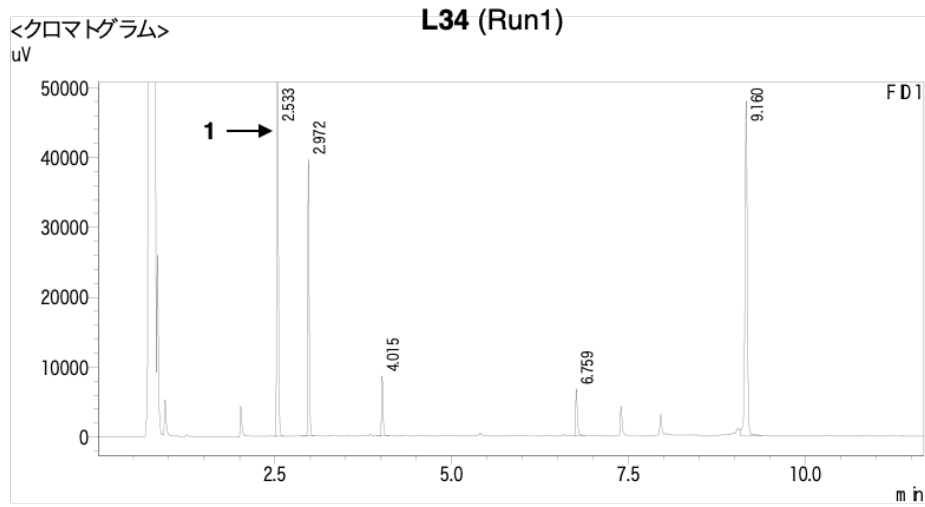

<ピークレポート>

| FD1   | Ret. Time | Area   | Height | 濃度    | 単位 | マ-ク | 化合物名 |
|-------|-----------|--------|--------|-------|----|-----|------|
| ピーク#  | 保持時間      | 面積     | 高さ     |       |    |     |      |
| 1     | 2.533     | 119419 | 87600  | 0.000 |    |     |      |
| 2     | 2.972     | 53372  | 38801  | 0.000 |    | V   |      |
| 3     | 4.015     | 12374  | 8355   | 0.000 |    | V   |      |
| 4     | 6.759     | 11070  | 6576   | 0.000 |    |     |      |
| 5     | 9.160     | 108195 | 47539  | 0.000 |    | V   |      |
| Total |           | 304430 | 188871 |       |    |     |      |

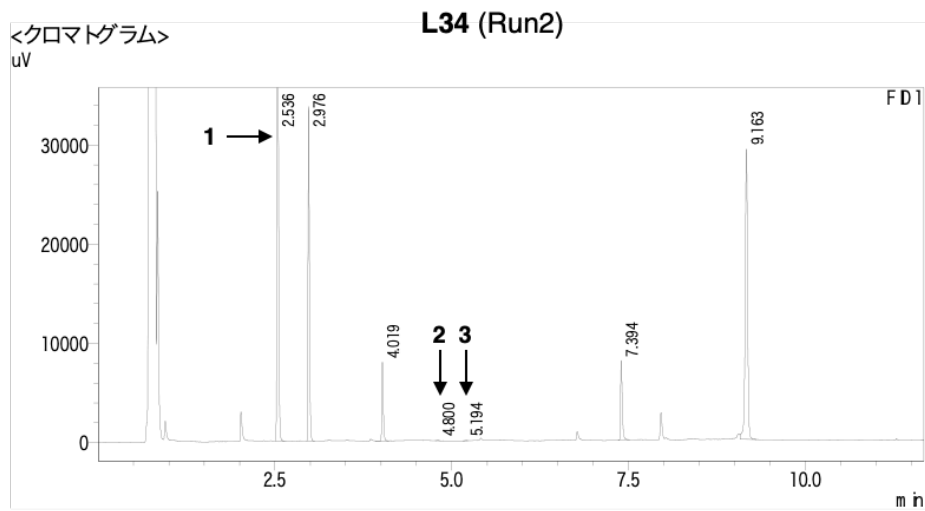

<ピークレポート>

| FD1   | Ret. Time | Area   | Height | 濃度     | 単位 | マ-ク | 化合物名 |
|-------|-----------|--------|--------|--------|----|-----|------|
| ピーク#  | 保持時間      | 面積     | 高さ     |        |    |     |      |
| 1     | 2.536     | 98488  | 72335  | 41.542 |    |     |      |
| 2     | 2.976     | 45327  | 33329  | 19.119 |    |     |      |
| 3     | 4.019     | 11414  | 7593   | 4.814  |    | V   |      |
| 4     | 4.800     | 42     | 32     | 0.018  |    | M   |      |
| 5     | 5.194     | 63     | 39     | 0.027  |    | M   |      |
| 6     | 7.394     | 13475  | 7937   | 5.684  |    |     |      |
| 7     | 9.163     | 68271  | 29110  | 28.797 |    | V   |      |
| Total |           | 237081 | 150375 |        |    |     |      |

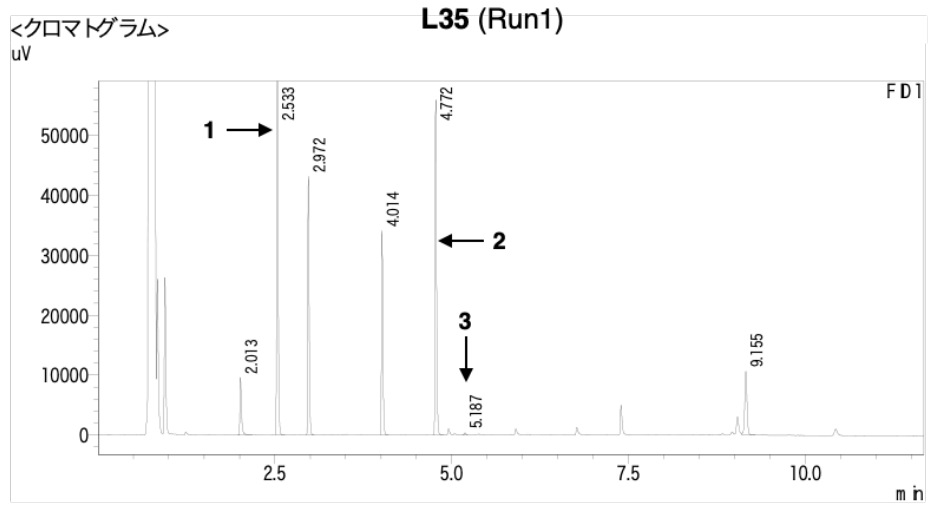

<ピークレポート>

| FD1  | Ret. Time | Area   | Height | 濃度     | 単位 | マーク | 化合物名 |
|------|-----------|--------|--------|--------|----|-----|------|
| ピーク# | 保持時間      | 面積     | 高さ     |        |    |     |      |
| 1    | 2.013     | 14940  | 9335   | 4.668  |    |     |      |
| 2    | 2.533     | 94325  | 69469  | 29.471 |    |     |      |
| 3    | 2.972     | 57958  | 42371  | 18.109 |    |     |      |
| 4    | 4.014     | 47556  | 32558  | 14.859 |    |     |      |
| 5    | 4.772     | 80987  | 55340  | 25.304 |    |     |      |
| 6    | 5.187     | 512    | 324    | 0.160  |    | M   |      |
| 7    | 9.155     | 23779  | 10598  | 7.429  |    | V   |      |
| Tota |           | 320057 | 219995 |        |    |     |      |

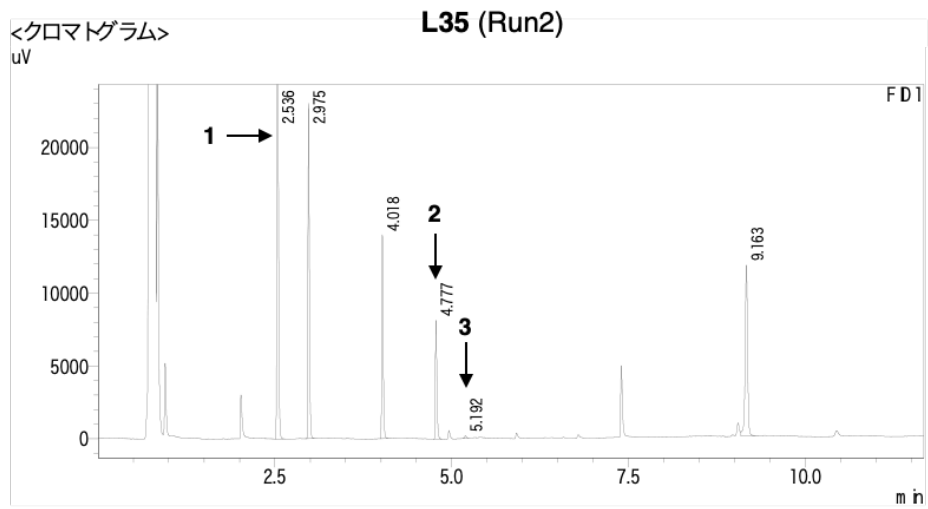

<ピークレポート>

| FD1  | Ret. Time | Area   | Height | 濃度     | 単位 | マーク | 化合物名 |
|------|-----------|--------|--------|--------|----|-----|------|
| ピーク# | 保持時間      | 面積     | 高さ     |        |    |     |      |
| 1    | 2.536     | 62524  | 44887  | 40.722 |    |     |      |
| 2    | 2.975     | 31210  | 22654  | 20.327 |    |     |      |
| 3    | 4.018     | 19828  | 13669  | 12.914 |    |     |      |
| 4    | 4.777     | 12188  | 8062   | 7.938  |    |     |      |
| 5    | 5.192     | 279    | 173    | 0.182  |    | M   |      |
| 6    | 9.163     | 27511  | 11637  | 17.918 |    | V   |      |
| Tota |           | 153539 | 101082 |        |    |     |      |

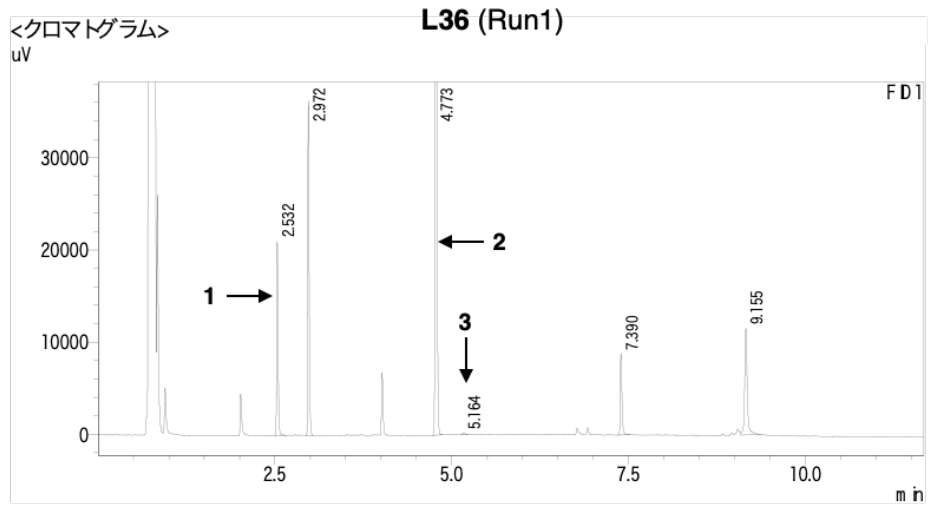

<ピークレポート>

| FD1  | Ret. Time | Area   | Height | 濃度     | 単位 | マーク | 化合物名 |
|------|-----------|--------|--------|--------|----|-----|------|
| ピーク# | 保持時間      | 面積     | 高さ     |        |    |     |      |
| 1    | 2.532     | 28843  | 20793  | 9.059  |    |     |      |
| 2    | 2.972     | 48970  | 35721  | 15.380 |    |     |      |
| 3    | 4.773     | 196060 | 136321 | 61.578 |    |     |      |
| 4    | 5.164     | 397    | 166    | 0.125  |    | M   |      |
| 5    | 7.390     | 14545  | 8692   | 4.568  |    |     |      |
| 6    | 9.155     | 29580  | 11507  | 9.290  |    | V   |      |
| Tota |           | 318395 | 213199 |        |    |     |      |

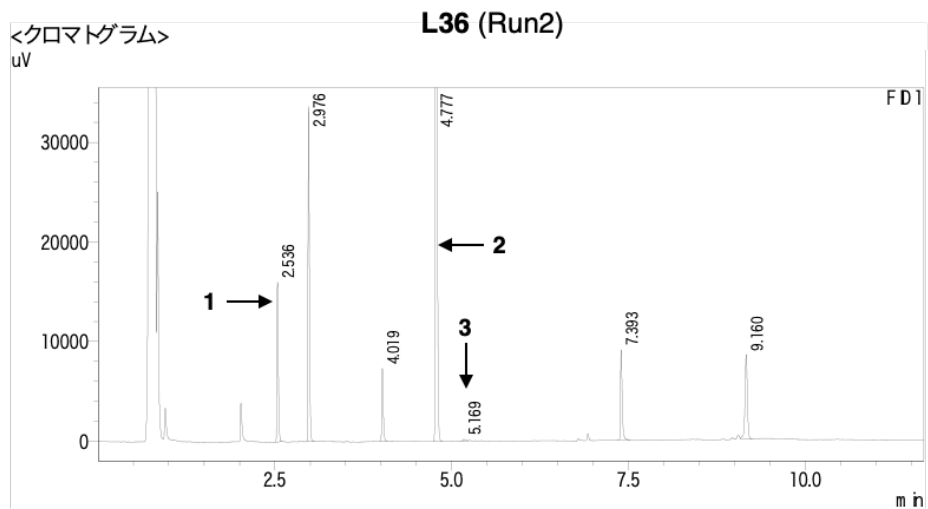

<ピークレポート>

| FD1  | Ret. Time | Area   | Height | 濃度     | 単位 | マーク | 化合物名 |
|------|-----------|--------|--------|--------|----|-----|------|
| ピーク# | 保持時間      | 面積     | 高さ     |        |    |     |      |
| 1    | 2.536     | 21961  | 15677  | 7.329  |    |     |      |
| 2    | 2.976     | 45443  | 33227  | 15.166 |    |     |      |
| 3    | 4.019     | 10499  | 7044   | 3.504  |    |     |      |
| 4    | 4.777     | 186570 | 129102 | 62.265 |    |     |      |
| 5    | 5.169     | 410    | 164    | 0.137  |    | M   |      |
| 6    | 7.393     | 15170  | 8810   | 5.063  |    |     |      |
| 7    | 9.160     | 19585  | 8417   | 6.536  |    | V   |      |
| Tota |           | 299639 | 202440 |        |    |     |      |

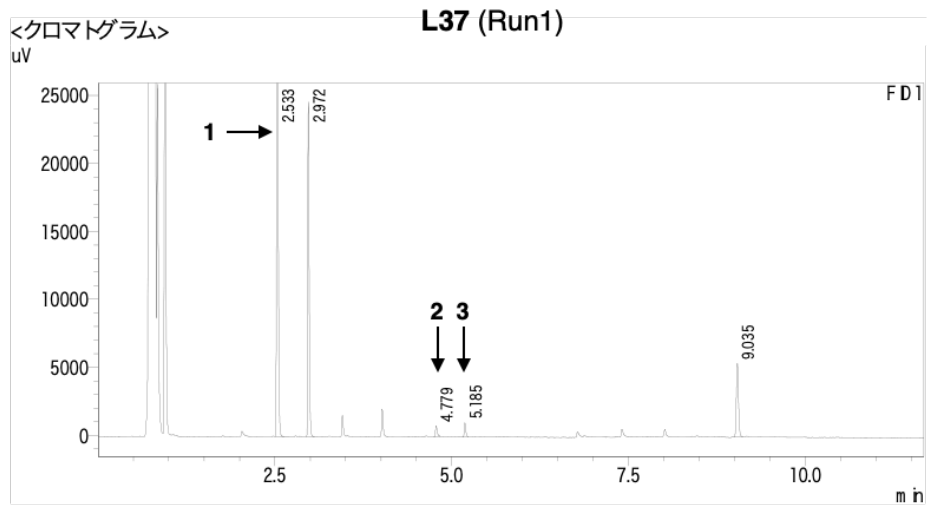

<ピークレポート>

| FD1   | Ret. Time | Area   | Height | 濃度     | 単位 | マーク | 化合物名 |
|-------|-----------|--------|--------|--------|----|-----|------|
| ピーク#  | 保持時間      | 面積     | 高さ     |        |    |     |      |
| 1     | 2.533     | 70204  | 51492  | 59.653 |    |     |      |
| 2     | 2.972     | 33292  | 24155  | 28.288 |    |     |      |
| 3     | 4.779     | 1285   | 790    | 1.092  |    | M   |      |
| 4     | 5.185     | 1513   | 1002   | 1.286  |    | M   |      |
| 5     | 9.035     | 11393  | 5365   | 9.680  |    |     |      |
| Total |           | 117687 | 82804  |        |    |     |      |

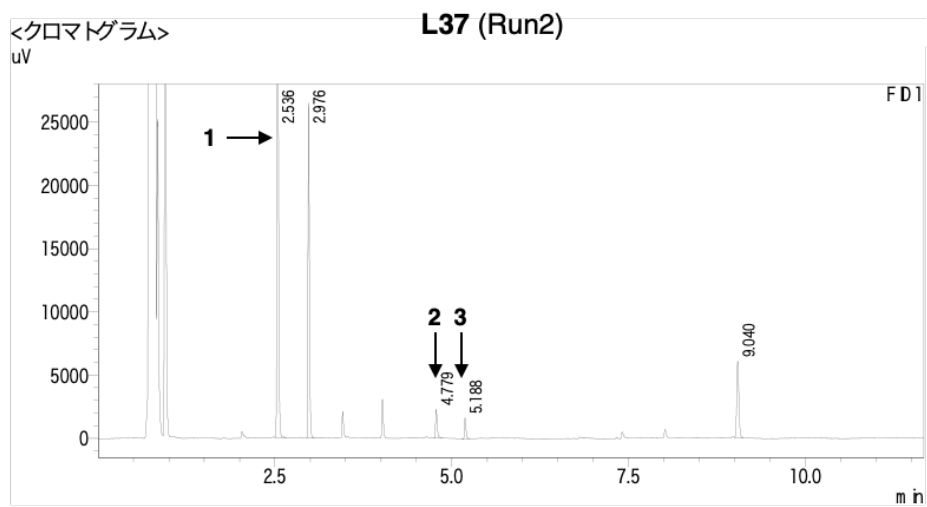

<ピークレポート>

| FD1   | Ret. Time | Area   | Height | 濃度     | 単位 | マーク | 化合物名 |
|-------|-----------|--------|--------|--------|----|-----|------|
| ピーク#  | 保持時間      | 面積     | 高さ     |        |    |     |      |
| 1     | 2.536     | 81435  | 59161  | 59.873 |    |     |      |
| 2     | 2.976     | 35922  | 26181  | 26.411 |    |     |      |
| 3     | 4.779     | 3541   | 2166   | 2.603  |    | M   |      |
| 4     | 5.188     | 2396   | 1618   | 1.761  |    | M   |      |
| 5     | 9.040     | 12719  | 5955   | 9.351  |    | V   |      |
| Total |           | 136012 | 95080  |        |    |     |      |



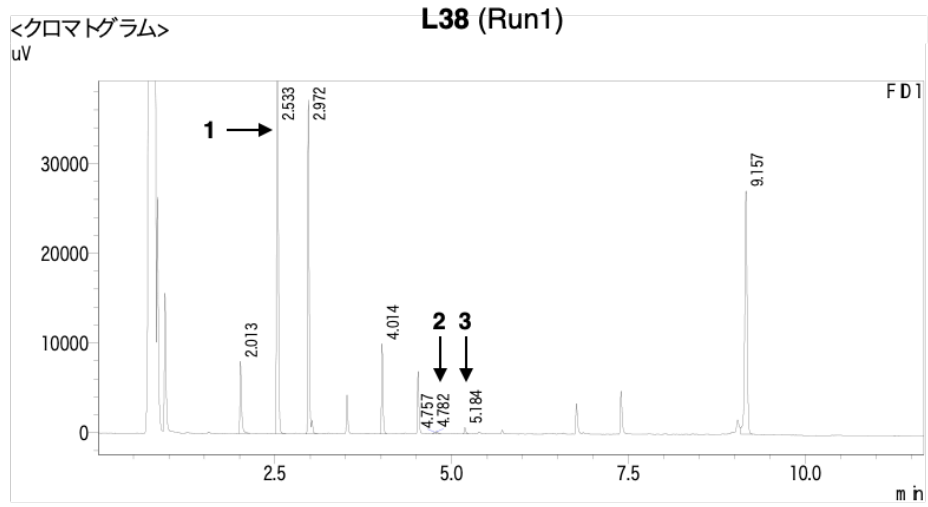

<ピークレポート>

| FD1   | Ret. Time | Area   | Height | 濃度     | 単位 | マーク | 化合物名 |
|-------|-----------|--------|--------|--------|----|-----|------|
| ピーク#  | 保持時間      | 面積     | 高さ     |        |    |     |      |
| 1     | 2.013     | 12582  | 7843   | 4.998  |    |     |      |
| 2     | 2.533     | 109300 | 80015  | 43.421 |    |     |      |
| 3     | 2.972     | 51910  | 36569  | 20.622 |    |     |      |
| 4     | 4.014     | 14291  | 9701   | 5.677  |    |     |      |
| 5     | 4.757     | 182    | 152    | 0.072  |    | M   |      |
| 6     | 4.782     | 355    | 203    | 0.141  |    | V M |      |
| 7     | 5.184     | 977    | 666    | 0.388  |    | M   |      |
| 8     | 9.157     | 62127  | 26716  | 24.681 |    | V   |      |
| Total |           | 251723 | 161865 |        |    |     |      |

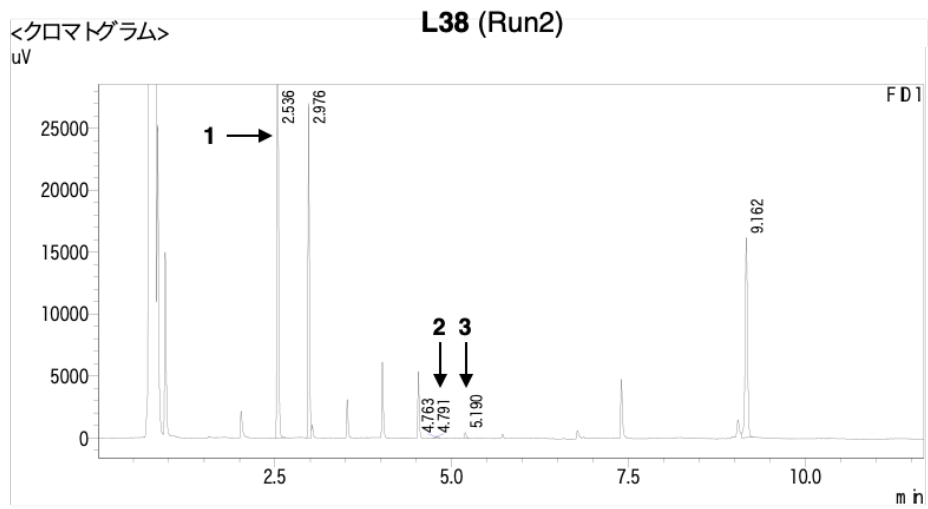

<ピークレポート>

| FD1   | Ret. Time | Area   | Height | 濃度     | 単位 | マーク | 化合物名 |
|-------|-----------|--------|--------|--------|----|-----|------|
| ピーク#  | 保持時間      | 面積     | 高さ     |        |    |     |      |
| 1     | 2.536     | 78852  | 57480  | 51.293 |    |     |      |
| 2     | 2.976     | 36529  | 26682  | 23.762 |    |     |      |
| 3     | 4.763     | 130    | 104    | 0.084  |    | M   |      |
| 4     | 4.791     | 203    | 117    | 0.132  |    | V M |      |
| 5     | 5.190     | 684    | 437    | 0.445  |    | M   |      |
| 6     | 9.162     | 37330  | 15936  | 24.283 |    | V   |      |
| Total |           | 153728 | 100756 |        |    |     |      |

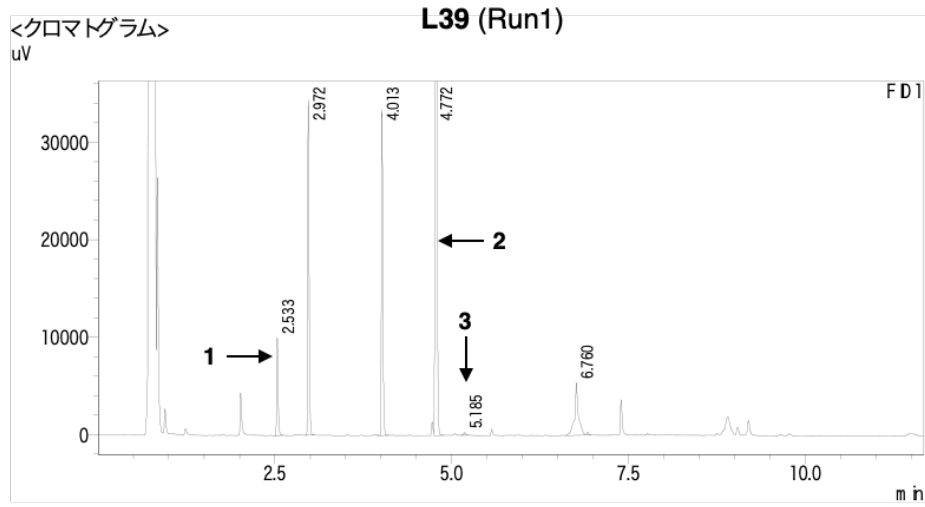

<ピークレポート>

| FD1  | Ret. Time | Area   | Height | 濃度     | 単位 | マーク | 化合物名 |
|------|-----------|--------|--------|--------|----|-----|------|
| ピーク# | 保持時間      | 面積     | 高さ     |        |    |     |      |
| 1    | 2.533     | 13883  | 9920   | 3.973  |    |     |      |
| 2    | 2.972     | 46806  | 34000  | 13.394 |    |     |      |
| 3    | 4.013     | 47174  | 32709  | 13.499 |    | V   |      |
| 4    | 4.772     | 220983 | 152781 | 63.236 |    | V   |      |
| 5    | 5.185     | 595    | 280    | 0.170  |    | M   |      |
| 6    | 6.760     | 20016  | 5357   | 5.728  |    | S   |      |
| Tota |           | 349458 | 235047 |        |    |     |      |

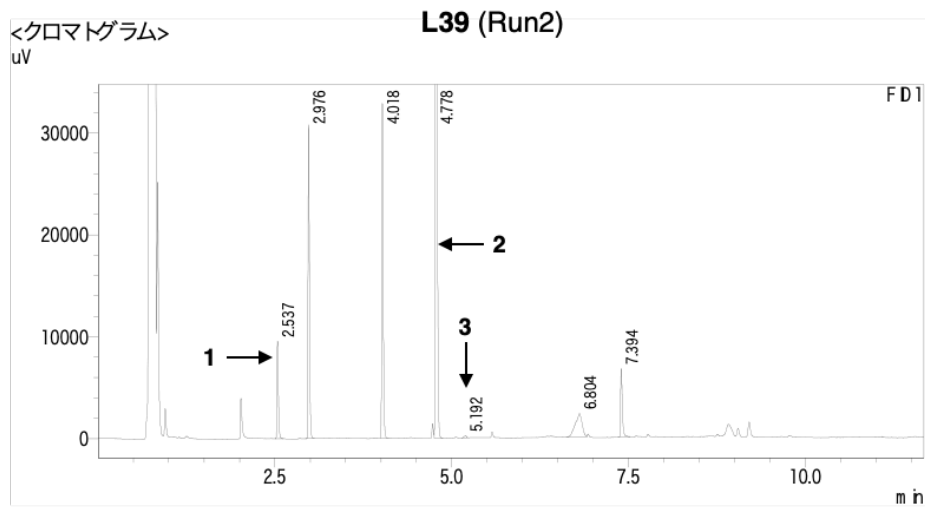

<ピークレポート>

| FD1  | Ret. Time | Area   | Height | 濃度     | 単位 | マーク | 化合物名 |
|------|-----------|--------|--------|--------|----|-----|------|
| ピーク# | 保持時間      | 面積     | 高さ     |        |    |     |      |
| 1    | 2.537     | 13373  | 9432   | 4.196  |    |     |      |
| 2    | 2.976     | 41701  | 30433  | 13.086 |    |     |      |
| 3    | 4.018     | 46451  | 32092  | 14.577 |    | V   |      |
| 4    | 4.778     | 189204 | 132058 | 59.373 |    | V   |      |
| 5    | 5.192     | 512    | 233    | 0.161  |    | M   |      |
| 6    | 6.804     | 15872  | 2317   | 4.981  |    |     |      |
| 7    | 7.394     | 11556  | 6657   | 3.626  |    |     |      |
| Tota |           | 318668 | 213223 |        |    |     |      |

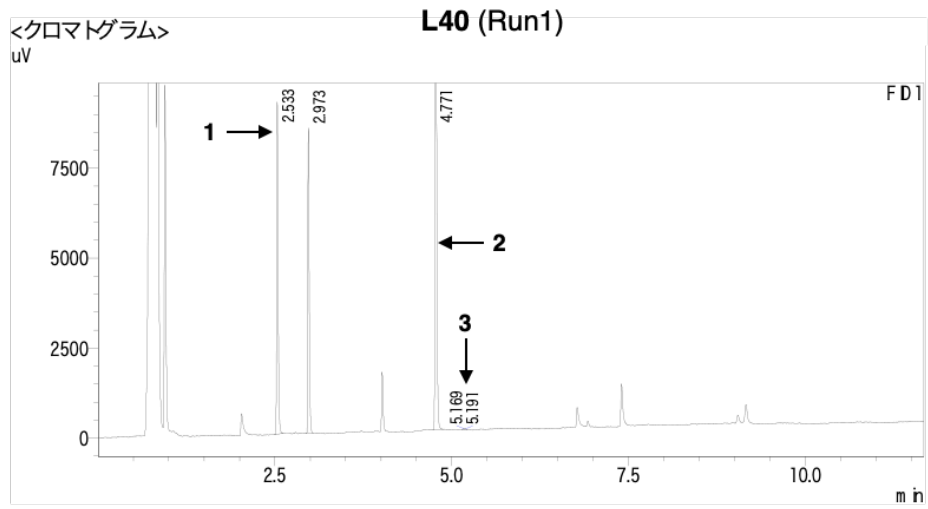

<ピークレポート>

| FD1   | Ret. Time | Area  | Height | 濃度     | 単位 | マーク | 化合物名 |
|-------|-----------|-------|--------|--------|----|-----|------|
| ピーク#  | 保持時間      | 面積    | 高さ     |        |    |     |      |
| 1     | 2.533     | 12878 | 9126   | 23.995 |    |     |      |
| 2     | 2.973     | 11627 | 8274   | 21.664 |    |     |      |
| 3     | 4.771     | 29099 | 19664  | 54.219 |    |     |      |
| 4     | 5.169     | 45    | 29     | 0.083  |    | M   |      |
| 5     | 5.191     | 21    | 23     | 0.039  |    | V M |      |
| Total |           | 53670 | 37115  |        |    |     |      |

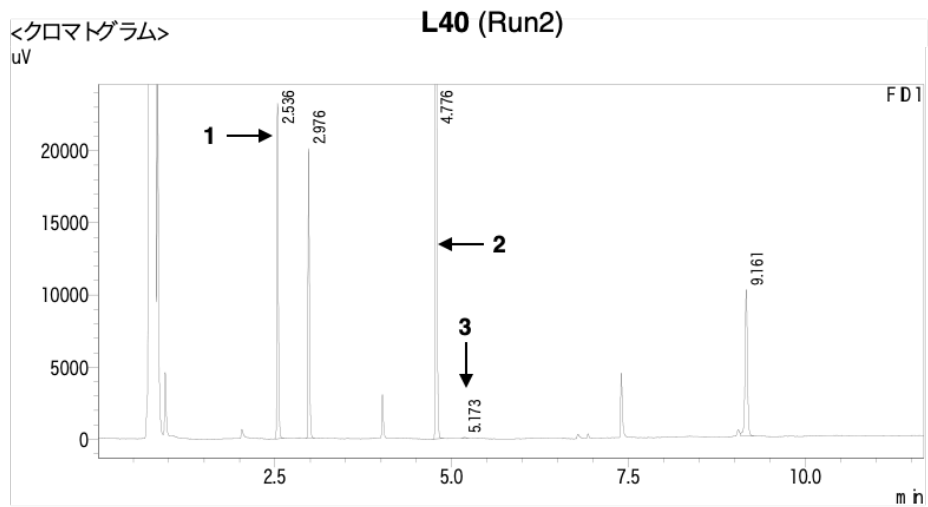

<ピークレポート>

| FD1   | Ret. Time | Area   | Height | 濃度     | 単位 | マーク | 化合物名 |
|-------|-----------|--------|--------|--------|----|-----|------|
| ピーク#  | 保持時間      | 面積     | 高さ     |        |    |     |      |
| 1     | 2.536     | 31693  | 22664  | 21.348 |    |     |      |
| 2     | 2.976     | 27244  | 19813  | 18.351 |    |     |      |
| 3     | 4.776     | 65729  | 44641  | 44.274 |    |     |      |
| 4     | 5.173     | 185    | 66     | 0.125  |    | M   |      |
| 5     | 9.161     | 23608  | 10035  | 15.902 |    | V   |      |
| Total |           | 148460 | 97219  |        |    |     |      |

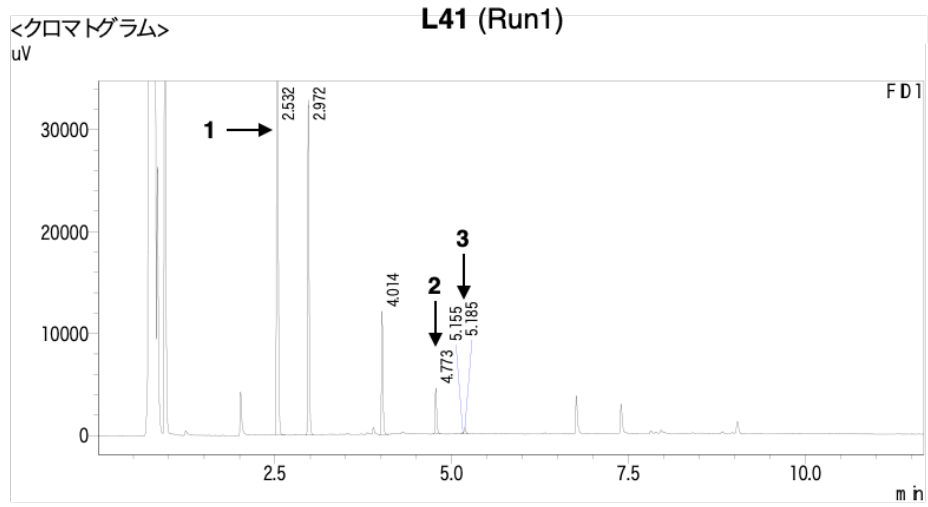

<ピークレポート>

| FD1   | Ret. Time | Area   | Height | 濃度     | 単位 | マーク | 化合物名 |
|-------|-----------|--------|--------|--------|----|-----|------|
| ピーク#  | 保持時間      | 面積     | 高さ     |        |    |     |      |
| 1     | 2.532     | 95330  | 69832  | 57.906 |    |     |      |
| 2     | 2.972     | 44291  | 32438  | 26.904 |    |     |      |
| 3     | 4.014     | 17164  | 11736  | 10.426 |    |     |      |
| 4     | 4.773     | 6735   | 4437   | 4.091  |    | M   |      |
| 5     | 5.155     | 157    | 145    | 0.096  |    | M   |      |
| 6     | 5.185     | 951    | 585    | 0.578  |    | V M |      |
| Total |           | 164628 | 119174 |        |    |     |      |

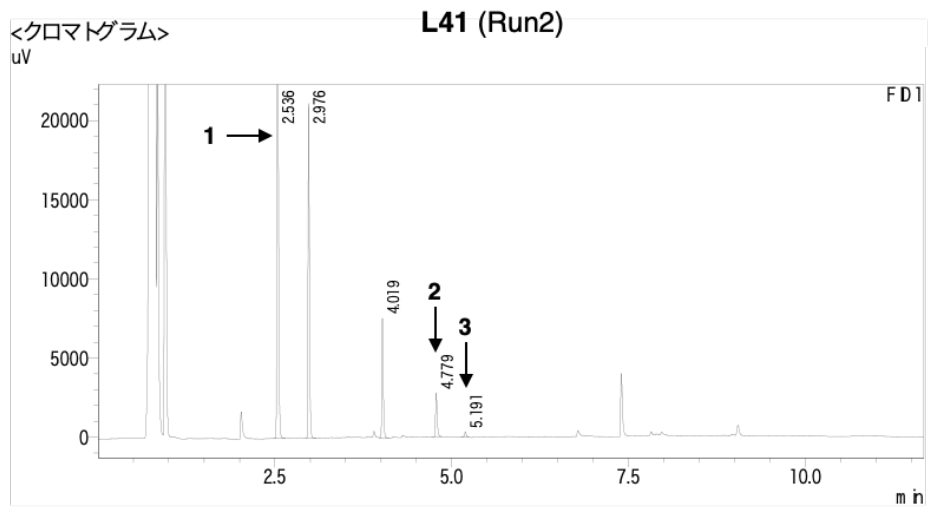

<ピークレポート>

| FD1   | Ret. Time | Area   | Height | 濃度     | 単位 | マーク | 化合物名 |
|-------|-----------|--------|--------|--------|----|-----|------|
| ピーク#  | 保持時間      | 面積     | 高さ     |        |    |     |      |
| 1     | 2.536     | 60150  | 43182  | 57.501 |    |     |      |
| 2     | 2.976     | 28697  | 20898  | 27.433 |    |     |      |
| 3     | 4.019     | 10856  | 7294   | 10.378 |    | V   |      |
| 4     | 4.779     | 4298   | 2702   | 4.108  |    | M   |      |
| 5     | 5.191     | 607    | 344    | 0.581  |    | M   |      |
| Total |           | 104608 | 74420  |        |    |     |      |

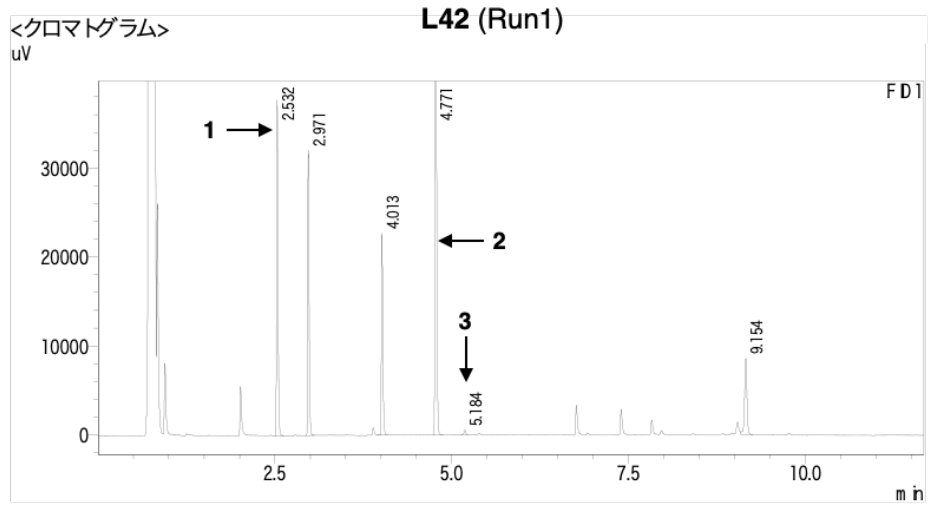

<ピークレポート>

| FD1  | Ret. Time | Area   | Height | 濃度     | 単位 | マーク | 化合物名 |
|------|-----------|--------|--------|--------|----|-----|------|
| ピーク# | 保持時間      | 面積     | 高さ     |        |    |     |      |
| 1    | 2.532     | 51162  | 37062  | 20.205 |    |     |      |
| 2    | 2.971     | 43165  | 31661  | 17.047 |    |     |      |
| 3    | 4.013     | 32039  | 22142  | 12.653 |    | V   |      |
| 4    | 4.771     | 106165 | 72504  | 41.926 |    |     |      |
| 5    | 5.184     | 894    | 524    | 0.353  |    | M   |      |
| 6    | 9.154     | 19792  | 8531   | 7.816  |    | V   |      |
| Tota |           | 253217 | 172423 |        |    |     |      |

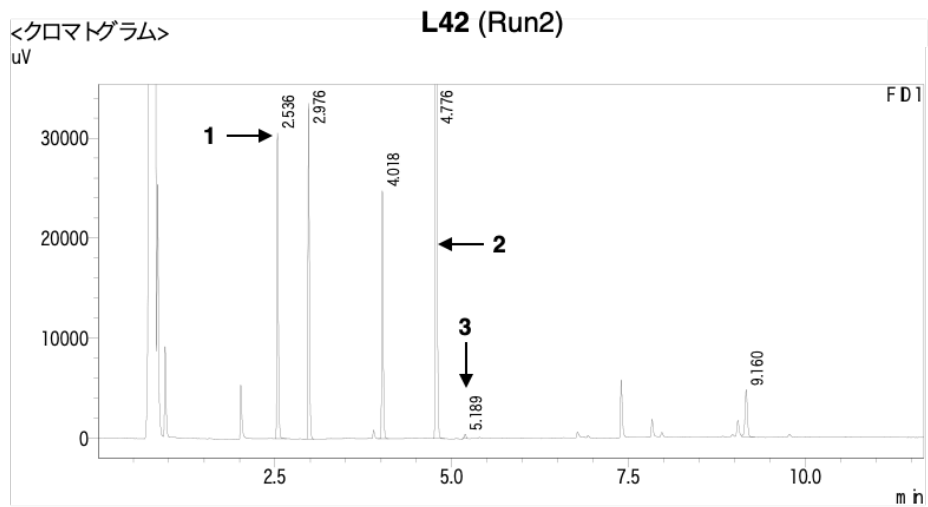

<ピークレポート>

| FD1  | Ret. Time | Area   | Height | 濃度     | 単位 | マーク | 化合物名 |
|------|-----------|--------|--------|--------|----|-----|------|
| ピーク# | 保持時間      | 面積     | 高さ     |        |    |     |      |
| 1    | 2.536     | 41935  | 29525  | 15.563 |    |     |      |
| 2    | 2.976     | 45242  | 33036  | 16.791 |    |     |      |
| 3    | 4.018     | 35025  | 24396  | 12.999 |    | V   |      |
| 4    | 4.776     | 135526 | 92907  | 50.297 |    |     |      |
| 5    | 5.189     | 707    | 418    | 0.262  |    | M   |      |
| 6    | 9.160     | 11014  | 4716   | 4.088  |    | V   |      |
| Tota |           | 269450 | 184999 |        |    |     |      |

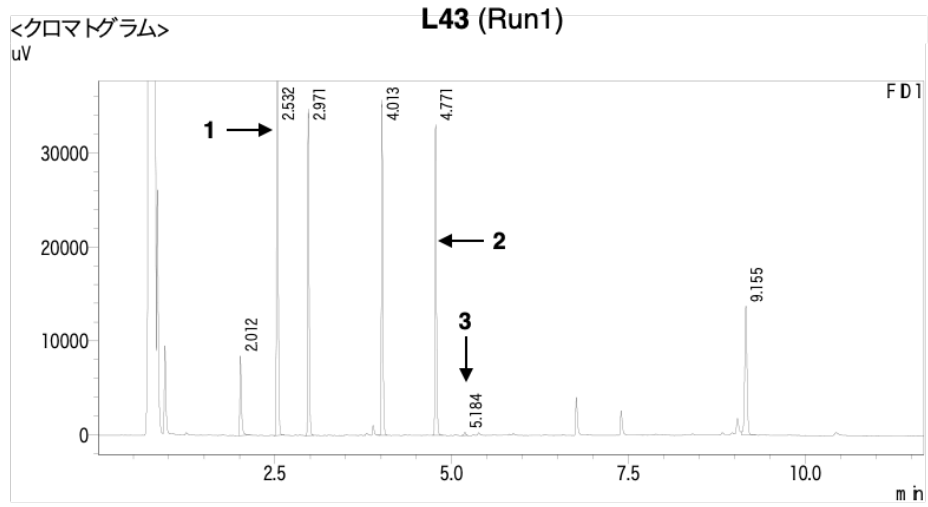

<ピークレポート>

| FD1<br>ピーク# | Ret. Time<br>保持時間 | Area<br>面積 | Height<br>高さ | 濃度     | 単位 | マーク | 化合物名 |
|-------------|-------------------|------------|--------------|--------|----|-----|------|
| 1           | 2.012             | 13158      | 8171         | 4.837  |    |     |      |
| 2           | 2.532             | 83040      | 60665        | 30.528 |    |     |      |
| 3           | 2.971             | 46858      | 34289        | 17.226 |    |     |      |
| 4           | 4.013             | 50062      | 34744        | 18.404 |    | V   |      |
| 5           | 4.771             | 47457      | 32125        | 17.447 |    |     |      |
| 6           | 5.184             | 633        | 340          | 0.233  |    | M   |      |
| 7           | 9.155             | 30803      | 13631        | 11.324 |    | V   |      |
| Total       |                   | 272010     | 183966       |        |    |     |      |

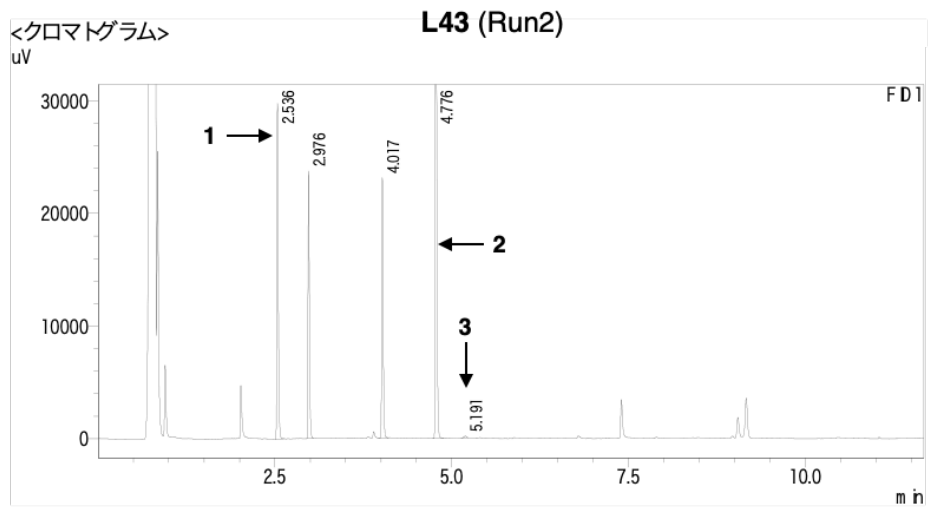

<ピークレポート>

| FD1<br>ピーク# | Ret. Time<br>保持時間 | Area<br>面積 | Height<br>高さ | 濃度     | 単位 | マーク | 化合物名 |
|-------------|-------------------|------------|--------------|--------|----|-----|------|
| 1           | 2.536             | 40247      | 28763        | 23.044 |    |     |      |
| 2           | 2.976             | 32022      | 23374        | 18.335 |    |     |      |
| 3           | 4.017             | 32725      | 22797        | 18.738 |    | V   |      |
| 4           | 4.776             | 69306      | 46655        | 39.683 |    |     |      |
| 5           | 5.191             | 348        | 167          | 0.199  |    | M   |      |
| Total       |                   | 174648     | 121757       |        |    |     |      |

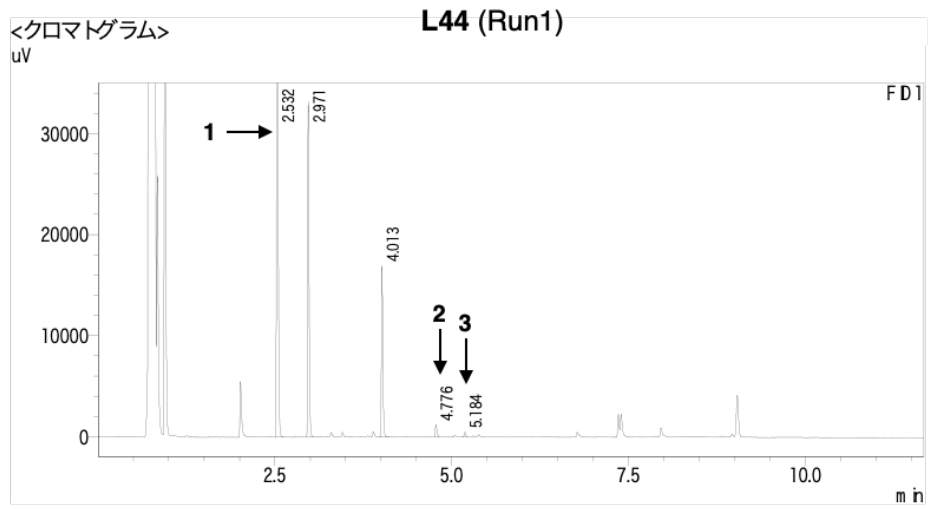

<ピークレポート>

| FD1   | Ret. Time | Area   | Height | 濃度     | 単位 | マーク | 化合物名 |
|-------|-----------|--------|--------|--------|----|-----|------|
| ピーク#  | 保持時間      | 面積     | 高さ     |        |    |     |      |
| 1     | 2.532     | 95612  | 69865  | 57.284 |    |     |      |
| 2     | 2.971     | 44735  | 32759  | 26.802 |    |     |      |
| 3     | 4.013     | 24108  | 16622  | 14.444 |    | V   |      |
| 4     | 4.776     | 1827   | 1177   | 1.094  |    | M   |      |
| 5     | 5.184     | 626    | 435    | 0.375  |    | M   |      |
| Total |           | 166907 | 120858 |        |    |     |      |

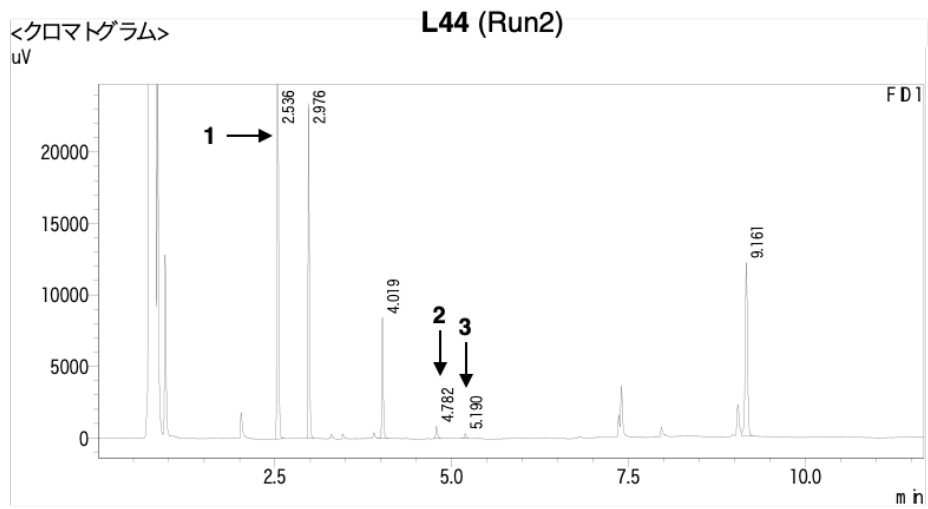

<ピークレポート>

| FD1   | Ret. Time | Area   | Height | 濃度     | 単位 | マーク | 化合物名 |
|-------|-----------|--------|--------|--------|----|-----|------|
| ピーク#  | 保持時間      | 面積     | 高さ     |        |    |     |      |
| 1     | 2.536     | 67659  | 48857  | 47.990 |    |     |      |
| 2     | 2.976     | 31474  | 23142  | 22.324 |    |     |      |
| 3     | 4.019     | 12097  | 8180   | 8.580  |    | V   |      |
| 4     | 4.782     | 1380   | 852    | 0.979  |    | M   |      |
| 5     | 5.190     | 549    | 334    | 0.390  |    | M   |      |
| 6     | 9.161     | 27826  | 11971  | 19.737 |    | V   |      |
| Total |           | 140985 | 93336  |        |    |     |      |

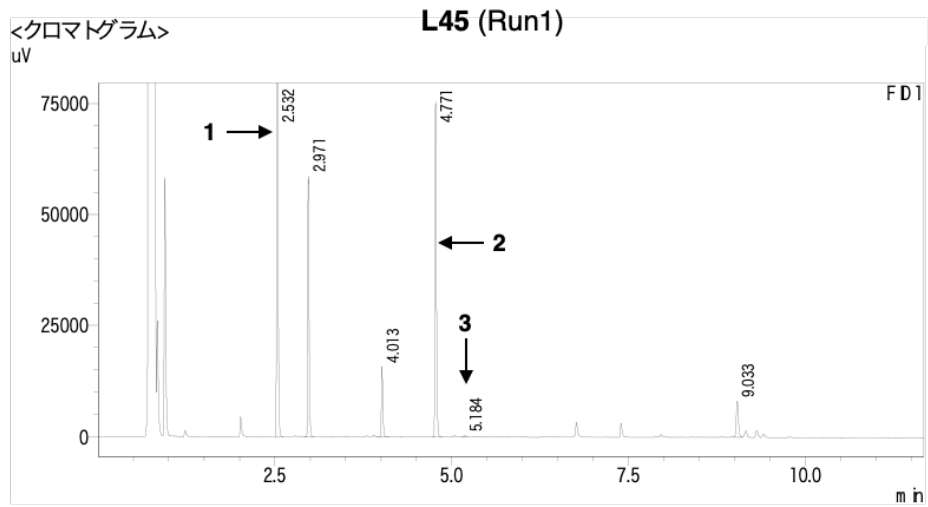

<ピークレポート>

| FD1  | Ret. Time | Area   | Height | 濃度     | 単位 | マーク | 化合物名 |
|------|-----------|--------|--------|--------|----|-----|------|
| ピーク# | 保持時間      | 面積     | 高さ     |        |    |     |      |
| 1    | 2.532     | 131477 | 97233  | 36.736 |    |     |      |
| 2    | 2.971     | 78705  | 58018  | 21.991 |    |     |      |
| 3    | 4.013     | 22514  | 15560  | 6.291  |    | V   |      |
| 4    | 4.771     | 107530 | 73485  | 30.045 |    |     |      |
| 5    | 5.184     | 564    | 305    | 0.157  |    | M   |      |
| 6    | 9.033     | 17112  | 8132   | 4.781  |    | V   |      |
| Tota |           | 357901 | 252734 |        |    |     |      |

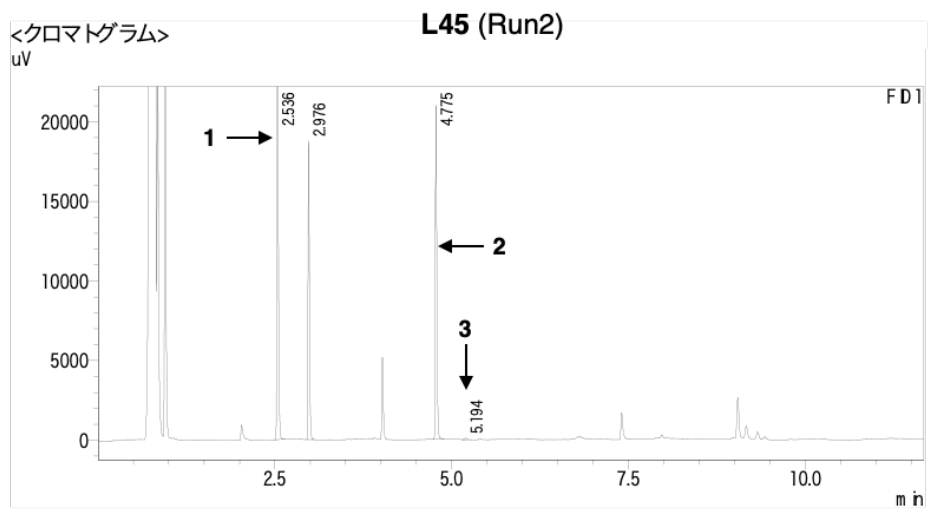

<ピークレポート>

| FD1  | Ret. Time | Area  | Height | 濃度     | 単位 | マーク | 化合物名 |
|------|-----------|-------|--------|--------|----|-----|------|
| ピーク# | 保持時間      | 面積    | 高さ     |        |    |     |      |
| 1    | 2.536     | 42275 | 30174  | 42.866 |    |     |      |
| 2    | 2.976     | 25559 | 18528  | 25.917 |    |     |      |
| 3    | 4.775     | 30614 | 20223  | 31.042 |    |     |      |
| 4    | 5.194     | 172   | 88     | 0.175  |    | M   |      |
| Tota |           | 98620 | 69013  |        |    |     |      |



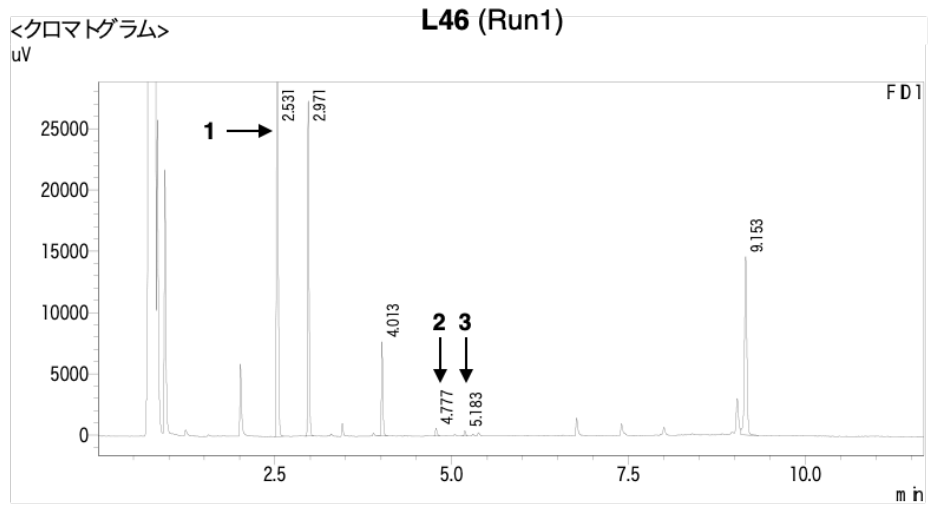

<ピークレポート>

| FD1   | Ret. Time | Area   | Height | 濃度     | 単位 | マーク | 化合物名 |
|-------|-----------|--------|--------|--------|----|-----|------|
| ピーク#  | 保持時間      | 面積     | 高さ     |        |    |     |      |
| 1     | 2.531     | 79065  | 57101  | 48.755 |    |     |      |
| 2     | 2.971     | 36916  | 26978  | 22.764 |    |     |      |
| 3     | 4.013     | 10970  | 7540   | 6.765  |    | V   |      |
| 4     | 4.777     | 1023   | 631    | 0.631  |    | M   |      |
| 5     | 5.183     | 633    | 415    | 0.390  |    | M   |      |
| 6     | 9.153     | 33561  | 14403  | 20.695 |    | V   |      |
| Total |           | 162169 | 107070 |        |    |     |      |

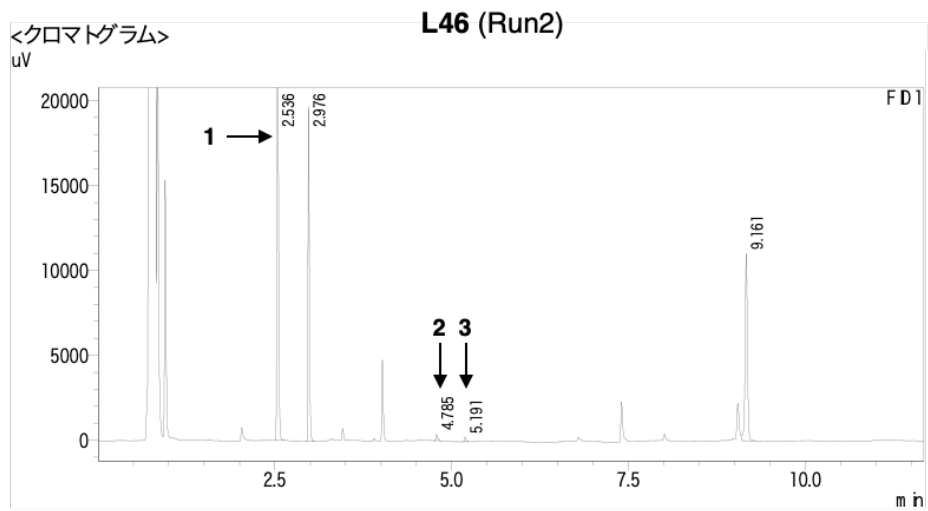

<ピークレポート>

| FD1   | Ret. Time | Area   | Height | 濃度     | 単位 | マーク | 化合物名 |
|-------|-----------|--------|--------|--------|----|-----|------|
| ピーク#  | 保持時間      | 面積     | 高さ     |        |    |     |      |
| 1     | 2.536     | 56627  | 40500  | 51.750 |    |     |      |
| 2     | 2.976     | 26521  | 19455  | 24.237 |    |     |      |
| 3     | 4.785     | 616    | 367    | 0.563  |    | M   |      |
| 4     | 5.191     | 412    | 271    | 0.376  |    | M   |      |
| 5     | 9.161     | 25249  | 10864  | 23.075 |    | V   |      |
| Total |           | 109424 | 71457  |        |    |     |      |

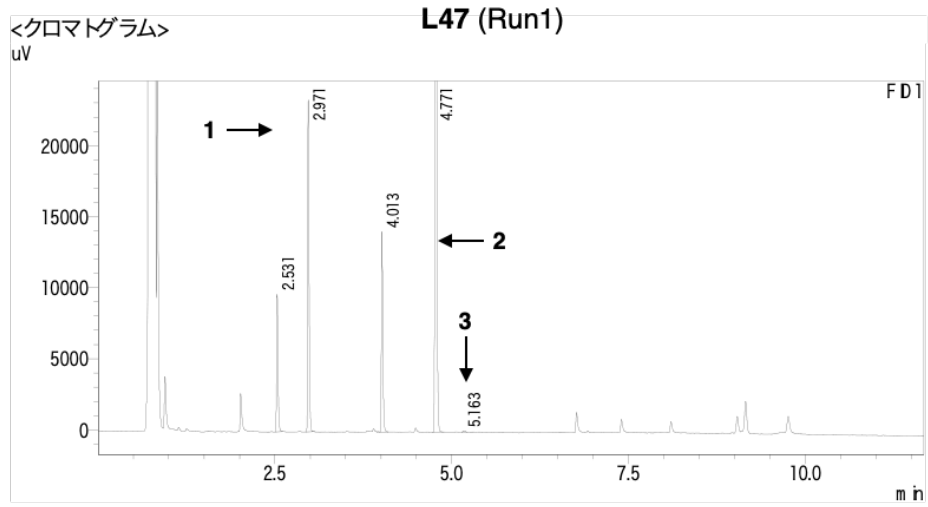

<ピークレポート>

| FD1   | Ret. Time | Area   | Height | 濃度     | 単位 | マーク | 化合物名 |
|-------|-----------|--------|--------|--------|----|-----|------|
| ピーク#  | 保持時間      | 面積     | 高さ     |        |    |     |      |
| 1     | 2.531     | 13513  | 9504   | 7.009  |    |     |      |
| 2     | 2.971     | 31667  | 23067  | 16.424 |    |     |      |
| 3     | 4.013     | 20128  | 13871  | 10.439 |    | V   |      |
| 4     | 4.771     | 127262 | 86267  | 66.004 |    |     |      |
| 5     | 5.163     | 240    | 87     | 0.124  |    | M   |      |
| Total |           | 192809 | 132797 |        |    |     |      |

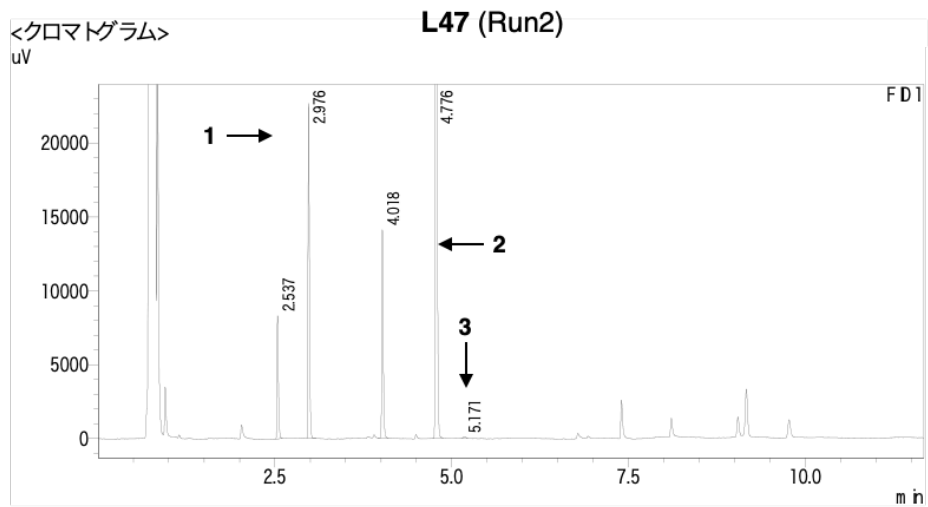

<ピークレポート>

| FD1   | Ret. Time | Area   | Height | 濃度     | 単位 | マーク | 化合物名 |
|-------|-----------|--------|--------|--------|----|-----|------|
| ピーク#  | 保持時間      | 面積     | 高さ     |        |    |     |      |
| 1     | 2.537     | 11616  | 8221   | 6.067  |    |     |      |
| 2     | 2.976     | 30795  | 22399  | 16.082 |    |     |      |
| 3     | 4.018     | 20393  | 13736  | 10.650 |    | V   |      |
| 4     | 4.776     | 128441 | 88078  | 67.077 |    |     |      |
| 5     | 5.171     | 237    | 84     | 0.124  |    | M   |      |
| Total |           | 191482 | 132517 |        |    |     |      |

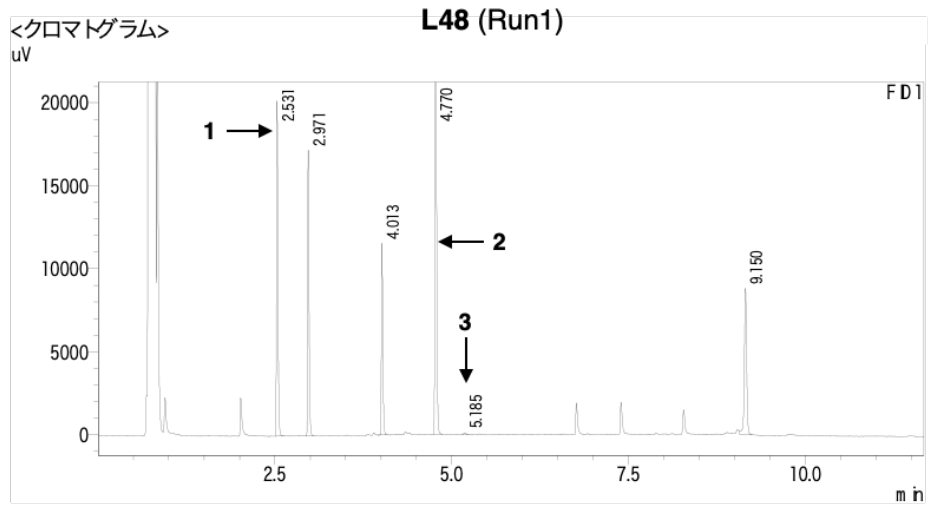

<ピークレポート>

| FD1  | Ret. Time | Area   | Height | 濃度     | 単位 | マ-ク | 化合物名 |
|------|-----------|--------|--------|--------|----|-----|------|
| ピーク# | 保持時間      | 面積     | 高さ     |        |    |     |      |
| 1    | 2.531     | 27518  | 19479  | 19.440 |    |     |      |
| 2    | 2.971     | 23280  | 16977  | 16.446 |    |     |      |
| 3    | 4.013     | 16411  | 11350  | 11.593 |    | V   |      |
| 4    | 4.770     | 54538  | 36392  | 38.528 |    |     |      |
| 5    | 5.185     | 213    | 101    | 0.151  |    | M   |      |
| 6    | 9.150     | 19593  | 8768   | 13.842 |    | V   |      |
| Tota |           | 141554 | 93068  |        |    |     |      |

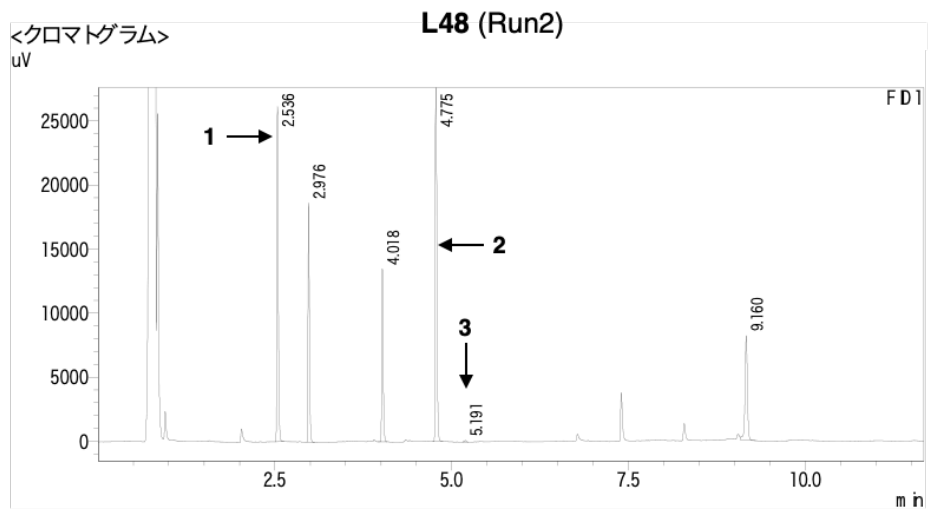

<ピークレポート>

| FD1  | Ret. Time | Area   | Height | 濃度     | 単位 | マ-ク | 化合物名 |
|------|-----------|--------|--------|--------|----|-----|------|
| ピーク# | 保持時間      | 面積     | 高さ     |        |    |     |      |
| 1    | 2.536     | 35659  | 25293  | 24.208 |    |     |      |
| 2    | 2.976     | 25483  | 18438  | 17.300 |    |     |      |
| 3    | 4.018     | 19061  | 13283  | 12.940 |    | V   |      |
| 4    | 4.775     | 47829  | 31958  | 32.471 |    |     |      |
| 5    | 5.191     | 232    | 115    | 0.157  |    | M   |      |
| 6    | 9.160     | 19036  | 8124   | 12.923 |    | V   |      |
| Tota |           | 147299 | 97210  |        |    |     |      |

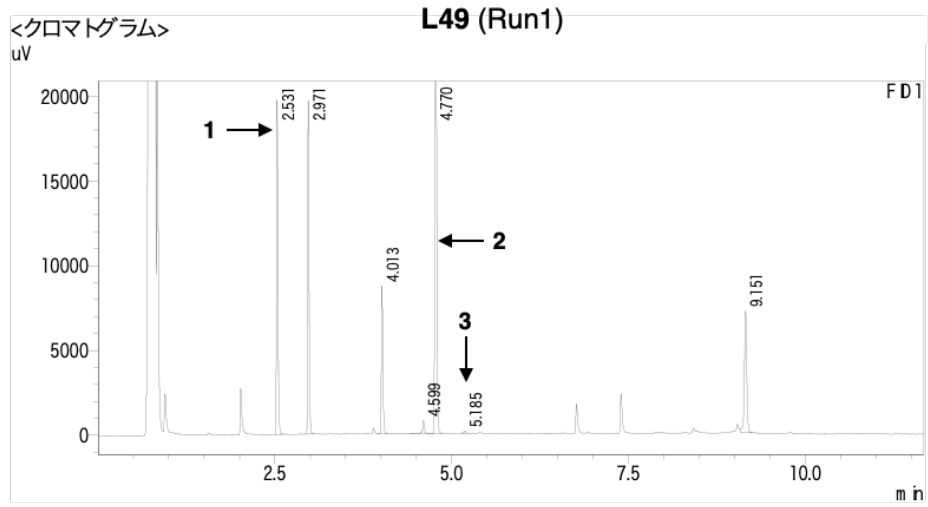

<ピークレポート>

| FD1<br>ピーク# | Ret. Time<br>保持時間 | Area<br>面積 | Height<br>高さ | 濃度     | 単位 | マーク | 化合物名 |
|-------------|-------------------|------------|--------------|--------|----|-----|------|
| 1           | 2.531             | 26932      | 18958        | 17.384 |    |     |      |
| 2           | 2.971             | 26658      | 19365        | 17.208 |    |     |      |
| 3           | 4.013             | 12439      | 8597         | 8.029  |    | V   |      |
| 4           | 4.599             | 1064       | 733          | 0.686  |    | M   |      |
| 5           | 4.770             | 70715      | 47813        | 45.646 |    |     |      |
| 6           | 5.185             | 266        | 131          | 0.171  |    | M   |      |
| 7           | 9.151             | 16848      | 7140         | 10.875 |    | V   |      |
| Tota        |                   | 154921     | 102737       |        |    |     |      |

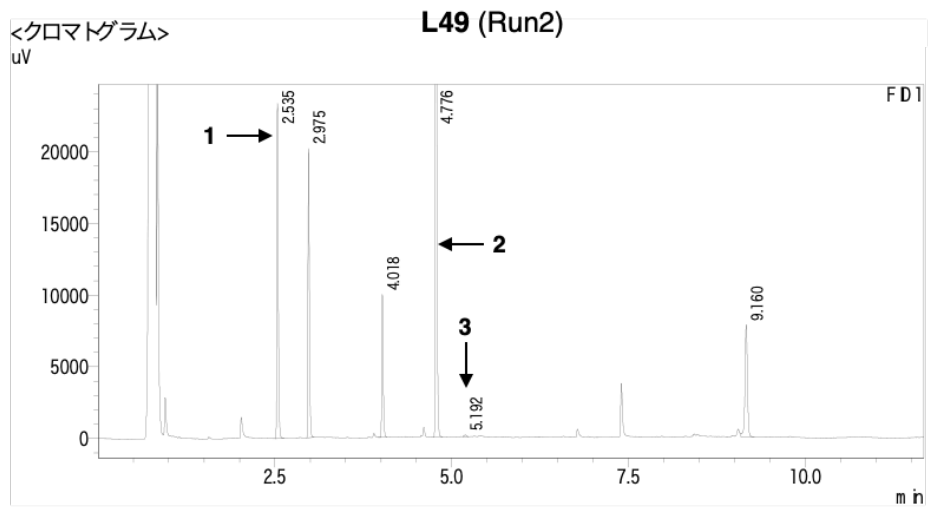

<ピークレポート>

| FD1<br>ピーク# | Ret. Time<br>保持時間 | Area<br>面積 | Height<br>高さ | 濃度     | 単位 | マーク | 化合物名 |
|-------------|-------------------|------------|--------------|--------|----|-----|------|
| 1           | 2.535             | 31934      | 22542        | 20.622 |    |     |      |
| 2           | 2.975             | 27446      | 19848        | 17.724 |    |     |      |
| 3           | 4.018             | 14128      | 9746         | 9.124  |    | V   |      |
| 4           | 4.776             | 62571      | 42263        | 40.407 |    |     |      |
| 5           | 5.192             | 257        | 124          | 0.166  |    | M   |      |
| 6           | 9.160             | 18517      | 7772         | 11.958 |    | V   |      |
| Tota        |                   | 154853     | 102295       |        |    |     |      |

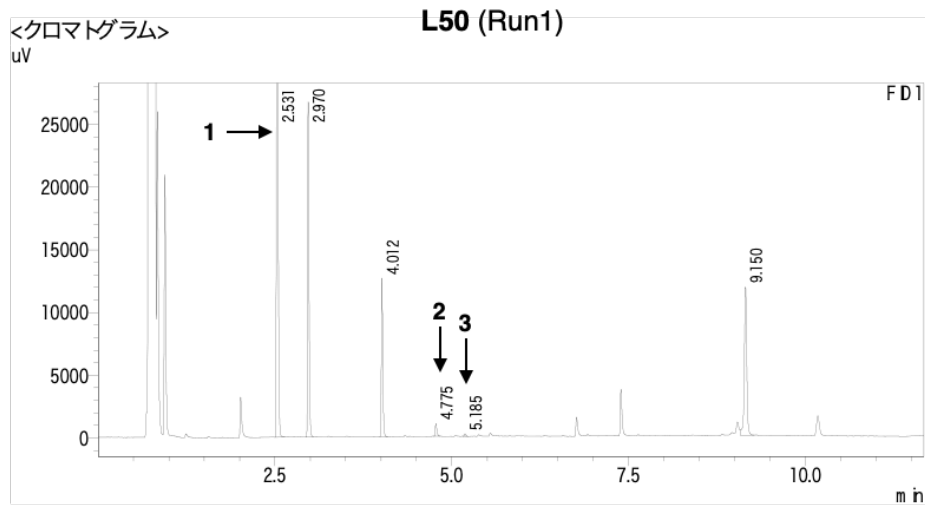

<ピークレポート>

| FD1<br>ピーク# | Ret. Time<br>保持時間 | Area<br>面積 | Height<br>高さ | 濃度     | 単位 | マーク | 化合物名 |
|-------------|-------------------|------------|--------------|--------|----|-----|------|
| 1           | 2.531             | 87357      | 63113        | 51.042 |    |     |      |
| 2           | 2.970             | 36206      | 26122        | 21.155 |    |     |      |
| 3           | 4.012             | 17867      | 12489        | 10.439 |    |     |      |
| 4           | 4.775             | 1583       | 972          | 0.925  |    | M   |      |
| 5           | 5.185             | 300        | 191          | 0.175  |    | M   |      |
| 6           | 9.150             | 27834      | 11765        | 16.263 |    | V   |      |
| Tota        |                   | 171147     | 114652       |        |    |     |      |

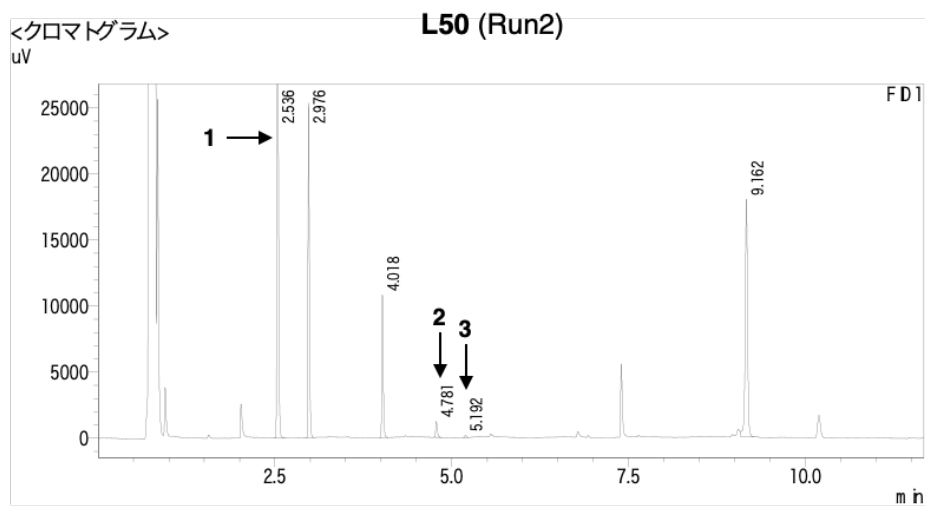

<ピークレポート>

| FD1<br>ピーク# | Ret. Time<br>保持時間 | Area<br>面積 | Height<br>高さ | 濃度     | 単位 | マーク | 化合物名 |
|-------------|-------------------|------------|--------------|--------|----|-----|------|
| 1           | 2.536             | 74145      | 53840        | 44.428 |    |     |      |
| 2           | 2.976             | 34295      | 25032        | 20.550 |    |     |      |
| 3           | 4.018             | 15359      | 10457        | 9.203  |    |     |      |
| 4           | 4.781             | 1875       | 1180         | 1.124  |    | M   |      |
| 5           | 5.192             | 240        | 158          | 0.144  |    | M   |      |
| 6           | 9.162             | 40972      | 17851        | 24.551 |    | V   |      |
| Tota        |                   | 166887     | 108518       |        |    |     |      |

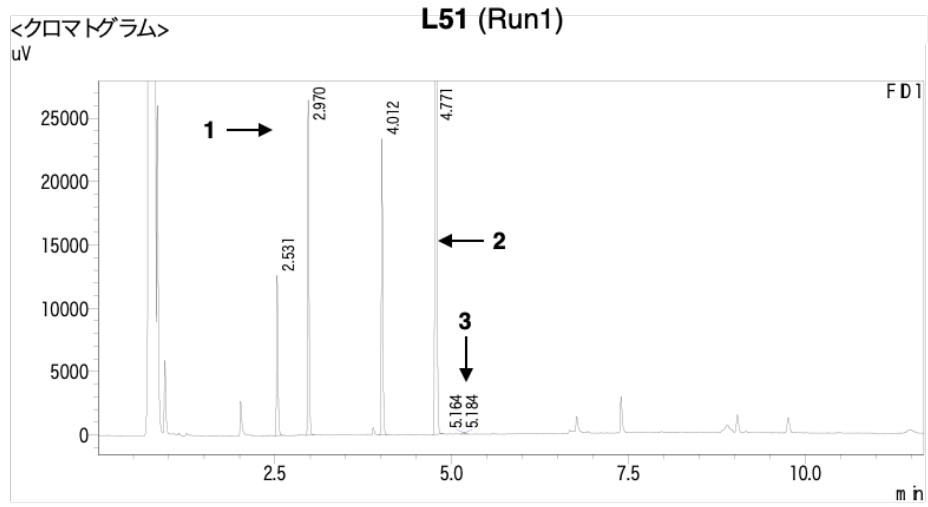

<ピークレポート>

| FD1   | Ret. Time | Area   | Height | 濃度     | 単位 | マーク | 化合物名 |
|-------|-----------|--------|--------|--------|----|-----|------|
| ピーク#  | 保持時間      | 面積     | 高さ     |        |    |     |      |
| 1     | 2.531     | 17451  | 12257  | 6.995  |    |     |      |
| 2     | 2.970     | 35586  | 25968  | 14.264 |    |     |      |
| 3     | 4.012     | 33033  | 23112  | 13.241 |    | V   |      |
| 4     | 4.771     | 163055 | 110983 | 65.359 |    |     |      |
| 5     | 5.164     | 134    | 117    | 0.054  |    | M   |      |
| 6     | 5.184     | 218    | 119    | 0.087  |    | V M |      |
| Total |           | 249477 | 172556 |        |    |     |      |

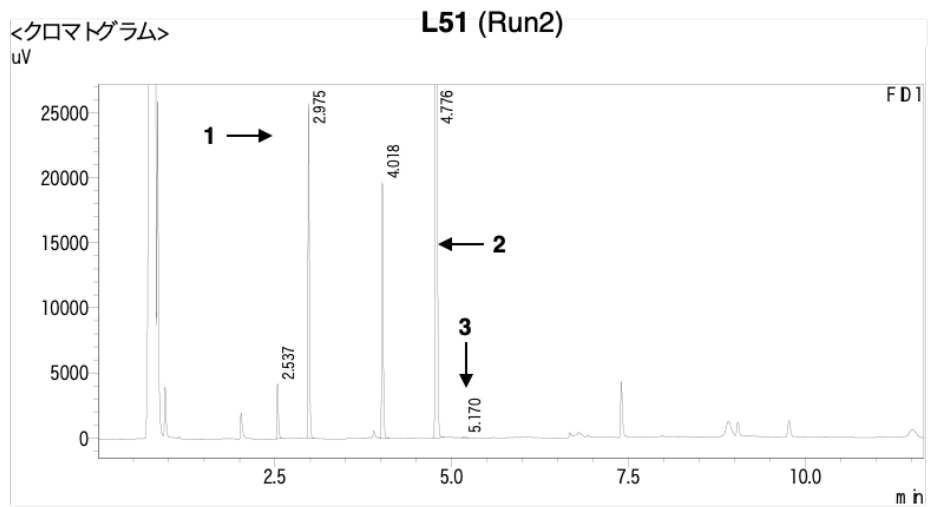

<ピークレポート>

| FD1   | Ret. Time | Area   | Height | 濃度     | 単位 | マーク | 化合物名 |
|-------|-----------|--------|--------|--------|----|-----|------|
| ピーク#  | 保持時間      | 面積     | 高さ     |        |    |     |      |
| 1     | 2.537     | 5901   | 4130   | 2.502  |    | M   |      |
| 2     | 2.975     | 34872  | 25321  | 14.786 |    |     |      |
| 3     | 4.018     | 27502  | 19320  | 11.662 |    | V   |      |
| 4     | 4.776     | 167303 | 113343 | 70.941 |    |     |      |
| 5     | 5.170     | 258    | 100    | 0.109  |    | M   |      |
| Total |           | 235835 | 162213 |        |    |     |      |

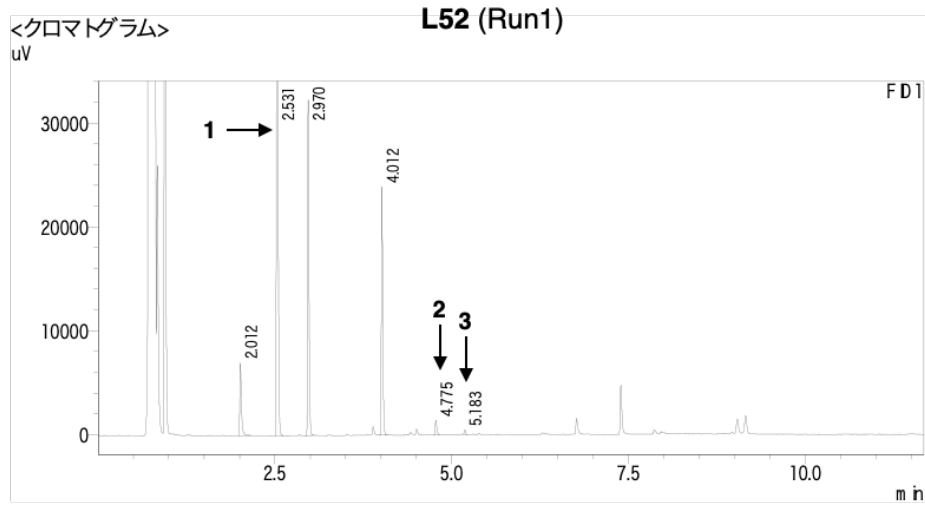

<ピークレポート>

| FD1<br>ピーク# | Ret. Time<br>保持時間 | Area<br>面積 | Height<br>高さ | 濃度     | 単位 | マーク | 化合物名 |
|-------------|-------------------|------------|--------------|--------|----|-----|------|
| 1           | 2.012             | 11151      | 6844         | 5.611  |    |     |      |
| 2           | 2.531             | 107725     | 77682        | 54.211 |    |     |      |
| 3           | 2.970             | 43542      | 31601        | 21.912 |    |     |      |
| 4           | 4.012             | 33555      | 23635        | 16.886 |    |     |      |
| 5           | 4.775             | 2159       | 1363         | 1.087  |    | M   |      |
| 6           | 5.183             | 582        | 424          | 0.293  |    | M   |      |
| Tota        |                   | 198714     | 141549       |        |    |     |      |

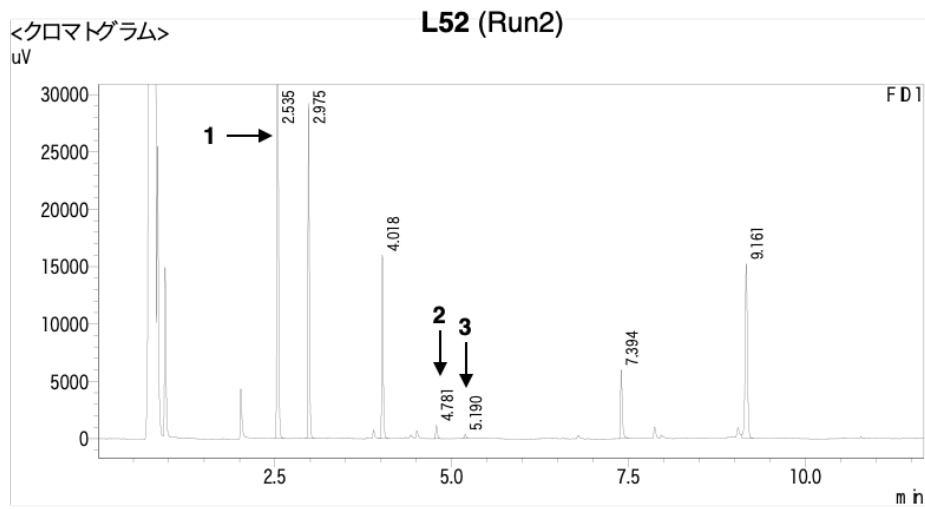

<ピークレポート>

| FD1<br>ピーク# | Ret. Time<br>保持時間 | Area<br>面積 | Height<br>高さ | 濃度     | 単位 | マーク | 化合物名 |
|-------------|-------------------|------------|--------------|--------|----|-----|------|
| 1           | 2.535             | 82829      | 59508        | 43.326 |    |     |      |
| 2           | 2.975             | 39632      | 28729        | 20.731 |    |     |      |
| 3           | 4.018             | 22646      | 15709        | 11.846 |    | V   |      |
| 4           | 4.781             | 1820       | 1148         | 0.952  |    | M   |      |
| 5           | 5.190             | 541        | 353          | 0.283  |    | M   |      |
| 6           | 7.394             | 10203      | 5943         | 5.337  |    |     |      |
| 7           | 9.161             | 33504      | 15002        | 17.525 |    | V   |      |
| Tota        |                   | 191174     | 126392       |        |    |     |      |

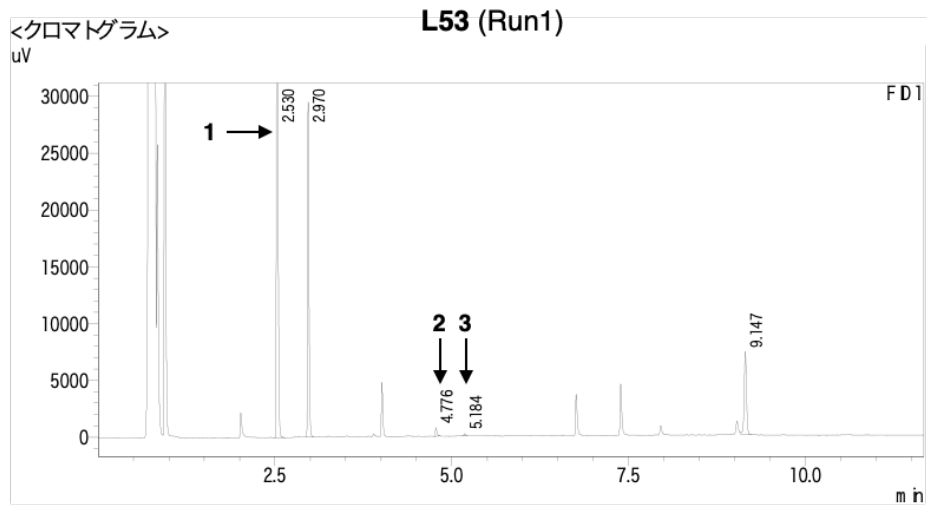

<ピークレポート>

| FD1   | Ret. Time | Area   | Height | 濃度     | 単位 | マーク | 化合物名 |
|-------|-----------|--------|--------|--------|----|-----|------|
| ピーク#  | 保持時間      | 面積     | 高さ     |        |    |     |      |
| 1     | 2.530     | 94950  | 67760  | 62.339 |    |     |      |
| 2     | 2.970     | 39708  | 28652  | 26.070 |    |     |      |
| 3     | 4.776     | 1210   | 733    | 0.795  |    | M   |      |
| 4     | 5.184     | 295    | 194    | 0.194  |    | M   |      |
| 5     | 9.147     | 16149  | 7182   | 10.602 |    | V   |      |
| Total |           | 152312 | 104522 |        |    |     |      |

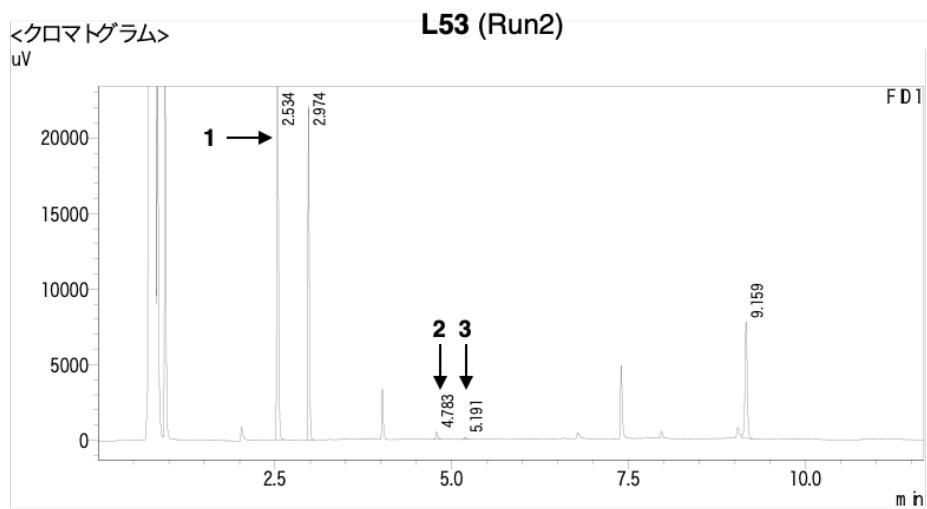

<ピークレポート>

| FD1   | Ret. Time | Area   | Height | 濃度     | 単位 | マーク | 化合物名 |
|-------|-----------|--------|--------|--------|----|-----|------|
| ピーク#  | 保持時間      | 面積     | 高さ     |        |    |     |      |
| 1     | 2.534     | 64168  | 45688  | 56.754 |    |     |      |
| 2     | 2.974     | 30204  | 21615  | 26.714 |    |     |      |
| 3     | 4.783     | 815    | 461    | 0.721  |    | M   |      |
| 4     | 5.191     | 211    | 143    | 0.187  |    | M   |      |
| 5     | 9.159     | 17665  | 7696   | 15.624 |    | V   |      |
| Total |           | 113064 | 75603  |        |    |     |      |



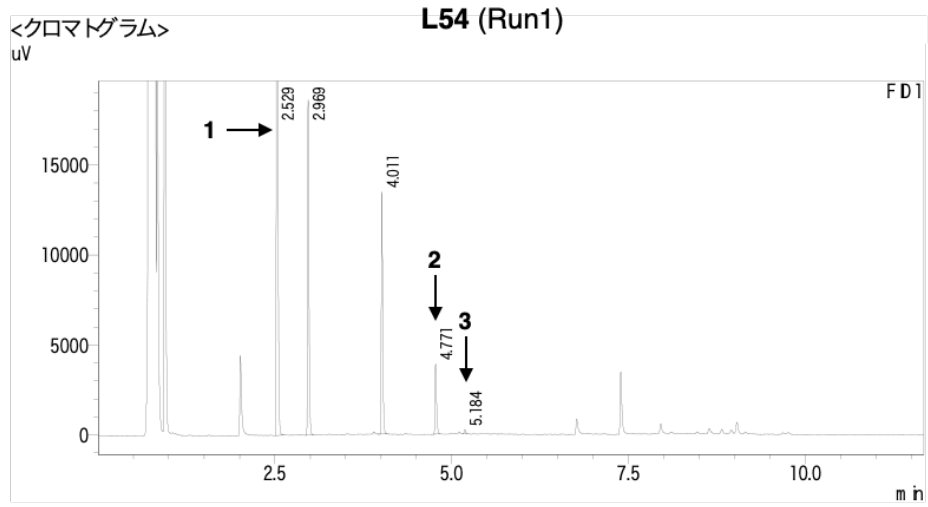

<ピークレポート>

| FD1   | Ret. Time | Area   | Height | 濃度     | 単位 | マーク | 化合物名 |
|-------|-----------|--------|--------|--------|----|-----|------|
| ピーク#  | 保持時間      | 面積     | 高さ     |        |    |     |      |
| 1     | 2.529     | 57415  | 41359  | 53.225 |    |     |      |
| 2     | 2.969     | 25270  | 17987  | 23.426 |    |     |      |
| 3     | 4.011     | 18982  | 13295  | 17.596 |    | V   |      |
| 4     | 4.771     | 5842   | 3820   | 5.416  |    | M   |      |
| 5     | 5.184     | 364    | 241    | 0.337  |    | M   |      |
| Total |           | 107872 | 76702  |        |    |     |      |

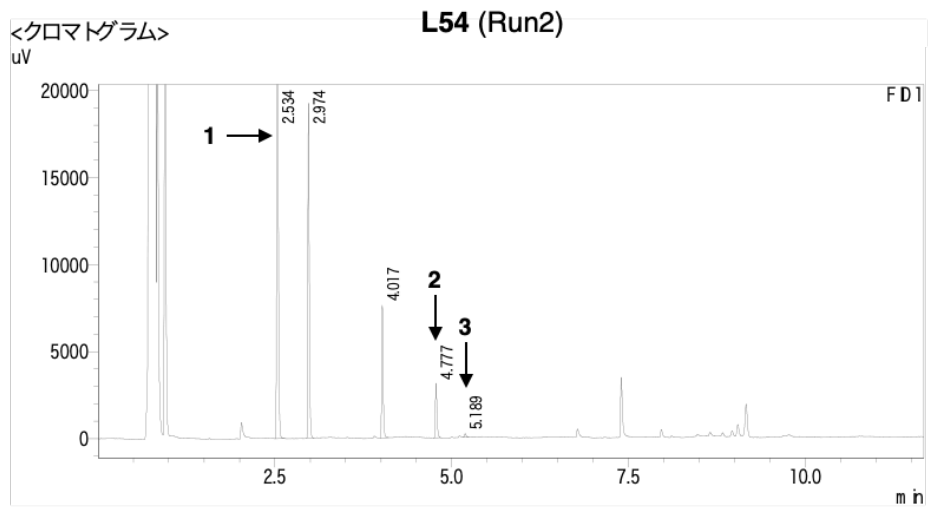

<ピークレポート>

| FD1   | Ret. Time | Area  | Height | 濃度     | 単位 | マーク | 化合物名 |
|-------|-----------|-------|--------|--------|----|-----|------|
| ピーク#  | 保持時間      | 面積    | 高さ     |        |    |     |      |
| 1     | 2.534     | 54001 | 39131  | 56.102 |    |     |      |
| 2     | 2.974     | 26236 | 18381  | 27.257 |    |     |      |
| 3     | 4.017     | 10945 | 7534   | 11.371 |    |     |      |
| 4     | 4.777     | 4778  | 3084   | 4.964  |    | M   |      |
| 5     | 5.189     | 294   | 195    | 0.305  |    | M   |      |
| Total |           | 96255 | 68325  |        |    |     |      |

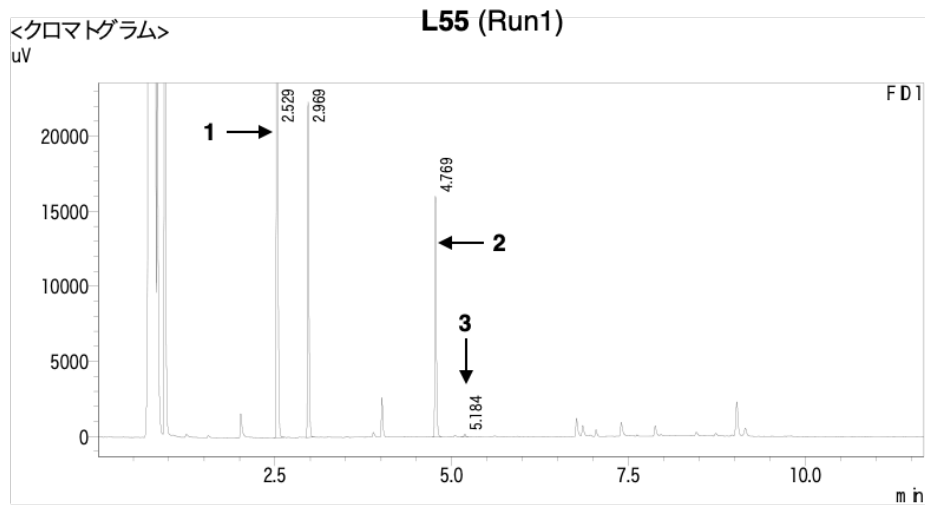

<ピークレポート>

| FD1   | Ret. Time | Area   | Height | 濃度     | 単位 | マーク | 化合物名 |
|-------|-----------|--------|--------|--------|----|-----|------|
| ピーク#  | 保持時間      | 面積     | 高さ     |        |    |     |      |
| 1     | 2.529     | 66120  | 47814  | 55.171 |    |     |      |
| 2     | 2.969     | 30147  | 21307  | 25.155 |    |     |      |
| 3     | 4.769     | 23310  | 15814  | 19.450 |    | M   |      |
| 4     | 5.184     | 269    | 168    | 0.225  |    | M   |      |
| Total |           | 119845 | 85102  |        |    |     |      |

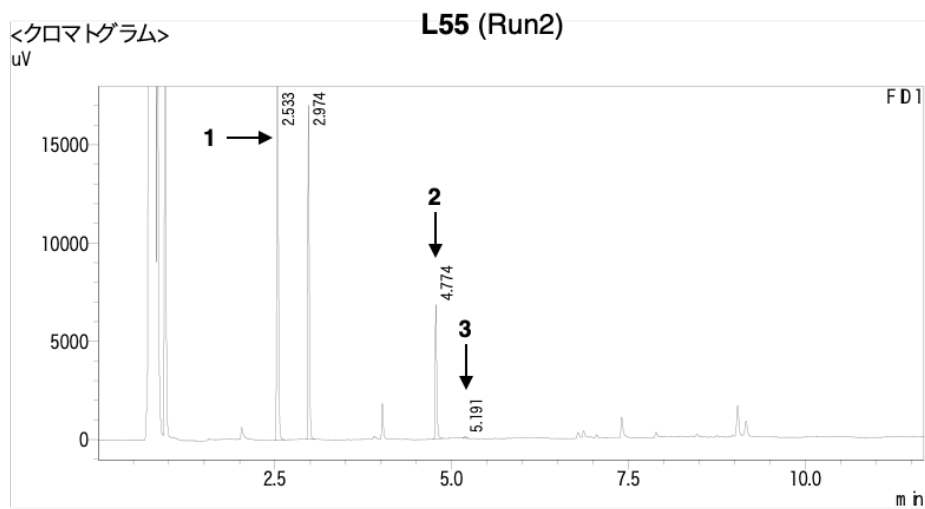

<ピークレポート>

| FD1   | Ret. Time | Area  | Height | 濃度     | 単位 | マーク | 化合物名 |
|-------|-----------|-------|--------|--------|----|-----|------|
| ピーク#  | 保持時間      | 面積    | 高さ     |        |    |     |      |
| 1     | 2.533     | 45279 | 32613  | 57.367 |    |     |      |
| 2     | 2.974     | 23144 | 16283  | 29.323 |    |     |      |
| 3     | 4.774     | 10318 | 6613   | 13.073 |    |     |      |
| 4     | 5.191     | 187   | 98     | 0.237  |    | M   |      |
| Total |           | 78929 | 55607  |        |    |     |      |

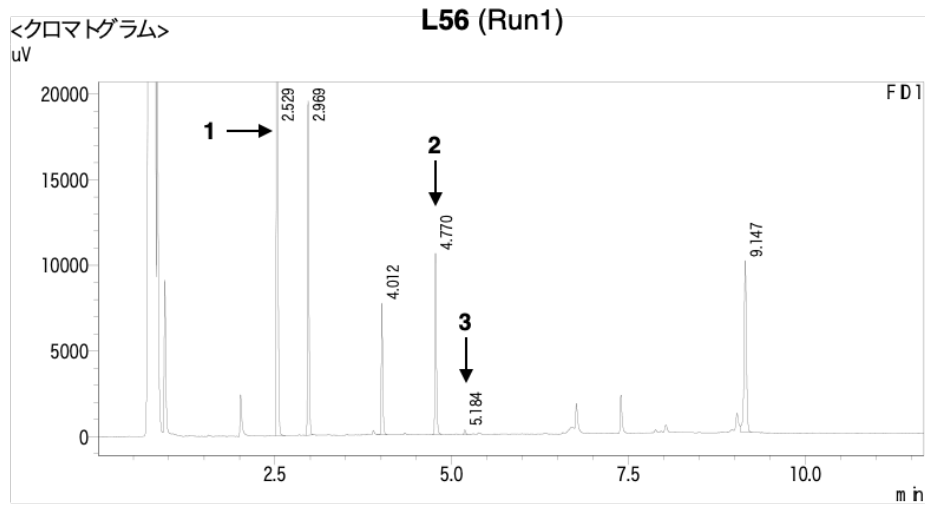

<ピークレポート>

| FD1  | Ret. Time | Area   | Height | 濃度     | 単位 | マーク | 化合物名 |
|------|-----------|--------|--------|--------|----|-----|------|
| ピーク# | 保持時間      | 面積     | 高さ     |        |    |     |      |
| 1    | 2.529     | 57306  | 41559  | 42.872 |    |     |      |
| 2    | 2.969     | 26474  | 18581  | 19.805 |    |     |      |
| 3    | 4.012     | 10985  | 7581   | 8.218  |    | V   |      |
| 4    | 4.770     | 15640  | 10274  | 11.701 |    |     |      |
| 5    | 5.184     | 364    | 252    | 0.272  |    | M   |      |
| 6    | 9.147     | 22901  | 9869   | 17.133 |    | V   |      |
| Tota |           | 133670 | 88115  |        |    |     |      |

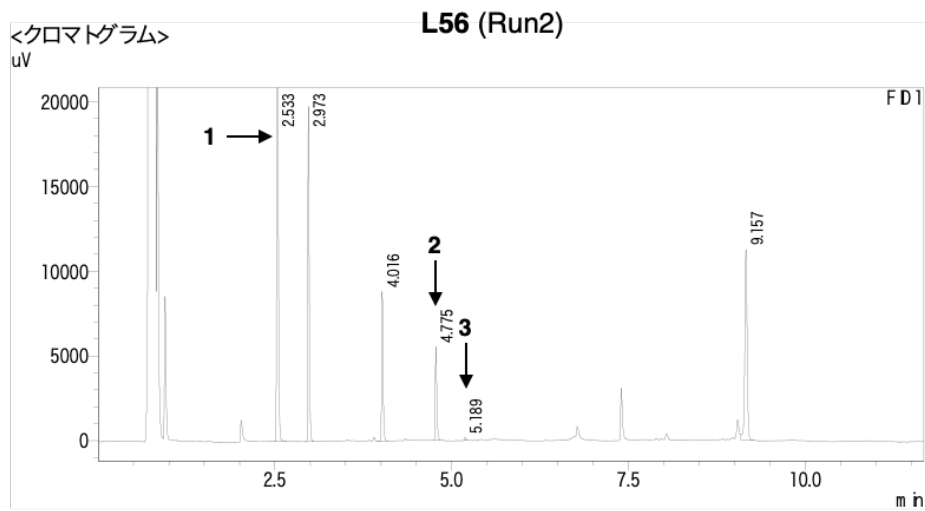

<ピークレポート>

| FD1  | Ret. Time | Area   | Height | 濃度     | 単位 | マーク | 化合物名 |
|------|-----------|--------|--------|--------|----|-----|------|
| ピーク# | 保持時間      | 面積     | 高さ     |        |    |     |      |
| 1    | 2.533     | 55162  | 40102  | 42.872 |    |     |      |
| 2    | 2.973     | 26856  | 19000  | 20.872 |    |     |      |
| 3    | 4.016     | 12560  | 8721   | 9.762  |    | V   |      |
| 4    | 4.775     | 8169   | 5333   | 6.349  |    | M   |      |
| 5    | 5.189     | 262    | 182    | 0.203  |    | M   |      |
| 6    | 9.157     | 25657  | 11097  | 19.941 |    | V   |      |
| Tota |           | 128666 | 84435  |        |    |     |      |

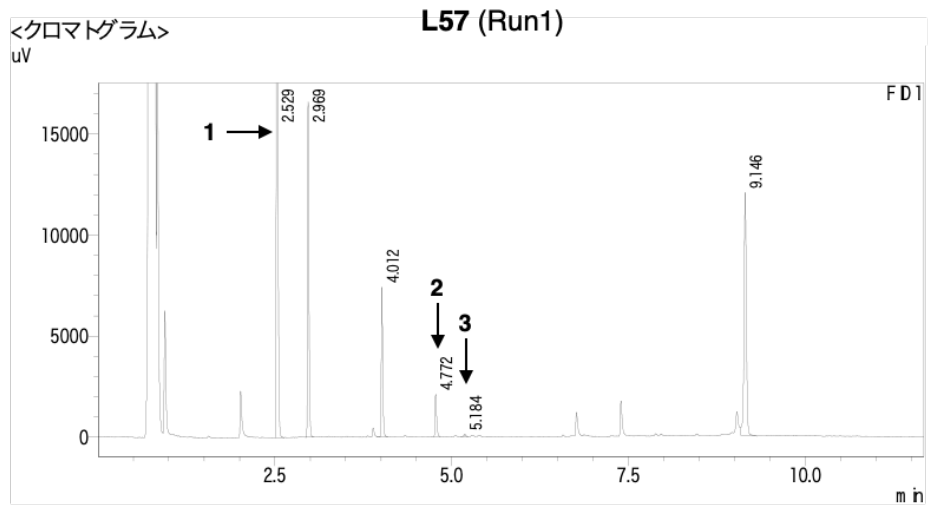

<ピークレポート>

| FD1   | Ret. Time | Area   | Height | 濃度     | 単位 | マーク | 化合物名 |
|-------|-----------|--------|--------|--------|----|-----|------|
| ピーク#  | 保持時間      | 面積     | 高さ     |        |    |     |      |
| 1     | 2.529     | 55469  | 40016  | 46.466 |    |     |      |
| 2     | 2.969     | 22537  | 15921  | 18.879 |    |     |      |
| 3     | 4.012     | 10614  | 7334   | 8.891  |    | V   |      |
| 4     | 4.772     | 3186   | 2054   | 2.669  |    | M   |      |
| 5     | 5.184     | 222    | 119    | 0.186  |    | M   |      |
| 6     | 9.146     | 27347  | 11936  | 22.908 |    | V   |      |
| Total |           | 119375 | 77379  |        |    |     |      |

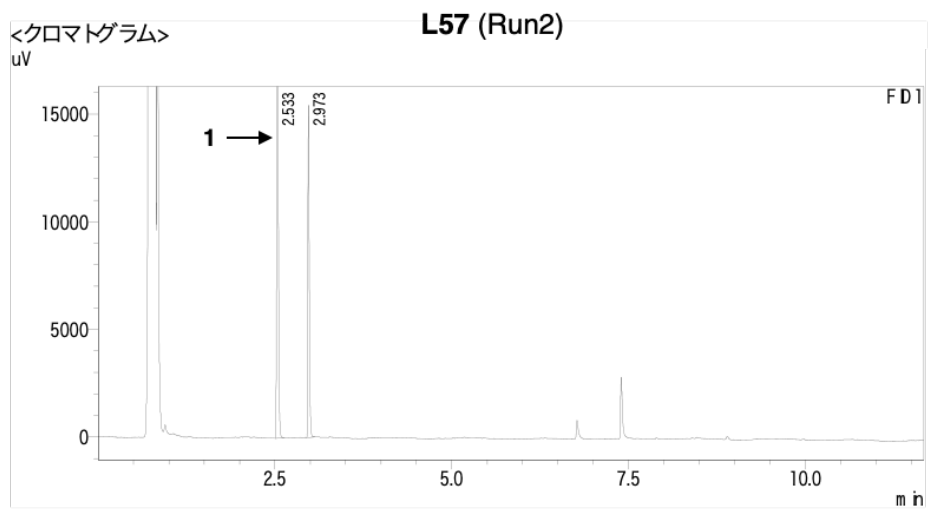

<ピークレポート>

| FD1   | Ret. Time | Area  | Height | 濃度    | 単位 | マーク | 化合物名 |
|-------|-----------|-------|--------|-------|----|-----|------|
| ピーク#  | 保持時間      | 面積    | 高さ     |       |    |     |      |
| 1     | 2.533     | 44863 | 32557  | 0.000 |    |     |      |
| 2     | 2.973     | 21151 | 14797  | 0.000 |    |     |      |
| Total |           | 66014 | 47354  |       |    |     |      |

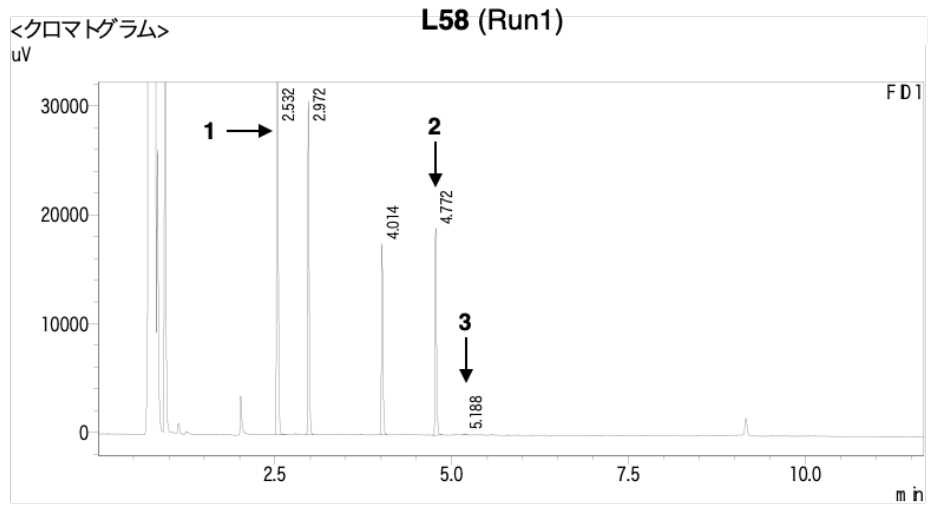

<ピークレポート>

| FD1   | Ret. Time | Area   | Height | 濃度     | 単位 | マーク | 化合物名 |
|-------|-----------|--------|--------|--------|----|-----|------|
| ピーク#  | 保持時間      | 面積     | 高さ     |        |    |     |      |
| 1     | 2.532     | 75457  | 55196  | 44.531 |    |     |      |
| 2     | 2.972     | 41254  | 30122  | 24.346 |    |     |      |
| 3     | 4.014     | 24940  | 16915  | 14.718 |    |     |      |
| 4     | 4.772     | 27644  | 18749  | 16.314 |    |     |      |
| 5     | 5.188     | 154    | 105    | 0.091  |    | M   |      |
| Total |           | 169450 | 121087 |        |    |     |      |

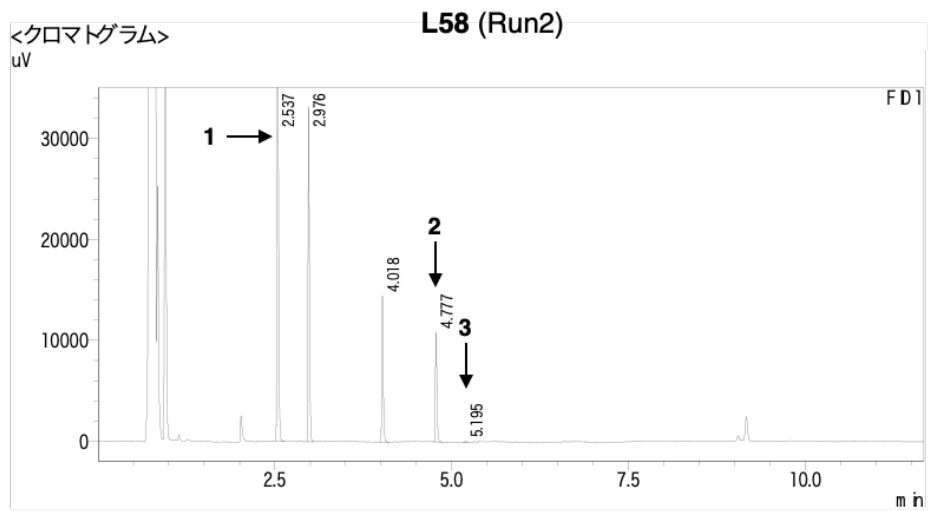

<ピークレポート>

| FD1   | Ret. Time | Area   | Height | 濃度     | 単位 | マーク | 化合物名 |
|-------|-----------|--------|--------|--------|----|-----|------|
| ピーク#  | 保持時間      | 面積     | 高さ     |        |    |     |      |
| 1     | 2.537     | 87099  | 63635  | 51.683 |    |     |      |
| 2     | 2.976     | 44722  | 32802  | 26.537 |    |     |      |
| 3     | 4.018     | 20591  | 14014  | 12.218 |    |     |      |
| 4     | 4.777     | 15987  | 10765  | 9.486  |    |     |      |
| 5     | 5.195     | 128    | 76     | 0.076  |    | M   |      |
| Total |           | 168527 | 121292 |        |    |     |      |

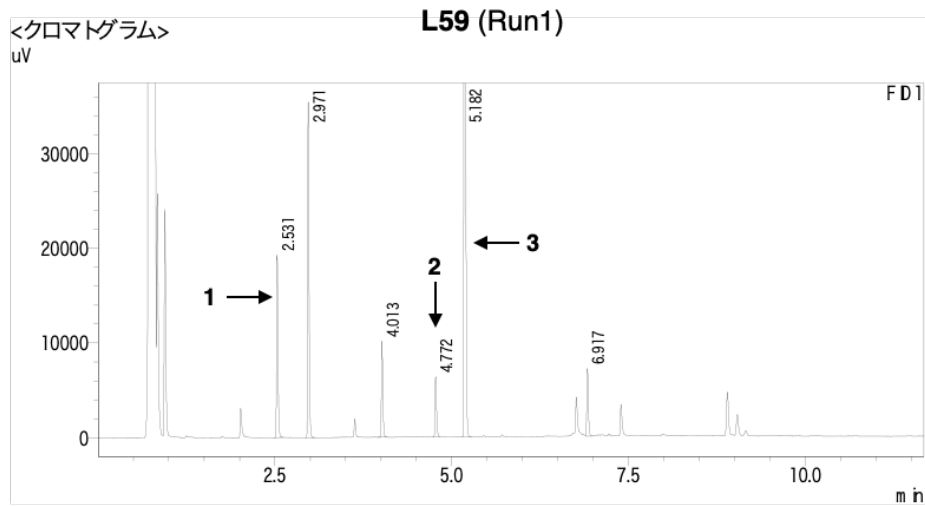

<ピークレポート>

| FD1   | Ret. Time | Area   | Height | 濃度     | 単位 | マーク | 化合物名 |
|-------|-----------|--------|--------|--------|----|-----|------|
| ピーク#  | 保持時間      | 面積     | 高さ     |        |    |     |      |
| 1     | 2.531     | 26307  | 18806  | 9.483  |    |     |      |
| 2     | 2.971     | 47566  | 34932  | 17.146 |    |     |      |
| 3     | 4.013     | 14317  | 9978   | 5.161  |    | V   |      |
| 4     | 4.772     | 9292   | 6231   | 3.349  |    | M   |      |
| 5     | 5.182     | 169047 | 117028 | 60.938 |    |     |      |
| 6     | 6.917     | 10882  | 6885   | 3.923  |    | V   |      |
| Total |           | 277411 | 193860 |        |    |     |      |

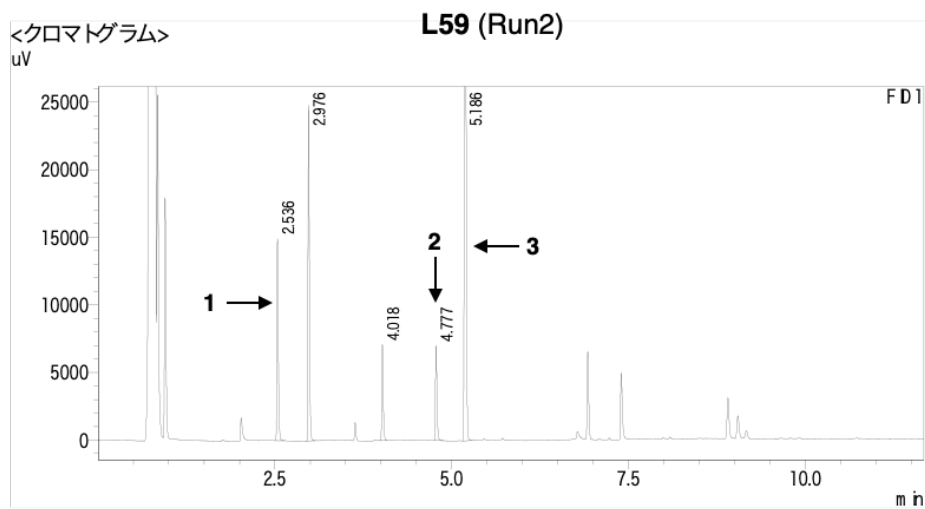

<ピークレポート>

| FD1   | Ret. Time | Area   | Height | 濃度    | 単位 | マーク | 化合物名 |
|-------|-----------|--------|--------|-------|----|-----|------|
| ピーク#  | 保持時間      | 面積     | 高さ     |       |    |     |      |
| 1     | 2.536     | 20669  | 14405  | 0.000 |    |     |      |
| 2     | 2.976     | 33812  | 24426  | 0.000 |    |     |      |
| 3     | 4.018     | 10091  | 6923   | 0.000 |    | V   |      |
| 4     | 4.777     | 10508  | 6954   | 0.000 |    |     |      |
| 5     | 5.186     | 109606 | 75291  | 0.000 |    |     |      |
| Total |           | 184686 | 128000 |       |    |     |      |

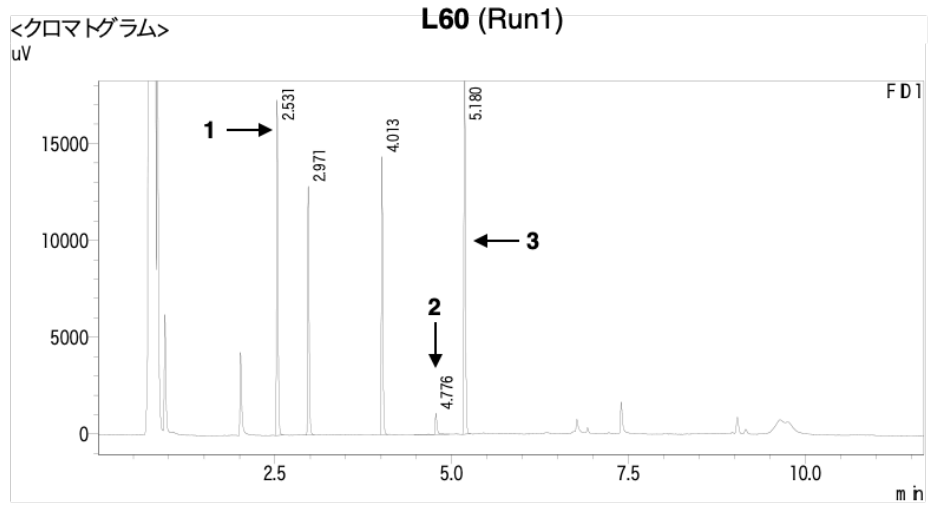

<ピークレポート>

| FD1   | Ret. Time | Area  | Height | 濃度     | 単位 | マーク | 化合物名 |
|-------|-----------|-------|--------|--------|----|-----|------|
| ピーク#  | 保持時間      | 面積    | 高さ     |        |    |     |      |
| 1     | 2.531     | 23755 | 16827  | 25.259 |    |     |      |
| 2     | 2.971     | 17573 | 12680  | 18.686 |    |     |      |
| 3     | 4.013     | 20386 | 14123  | 21.677 |    |     |      |
| 4     | 4.776     | 1814  | 1066   | 1.929  |    | M   |      |
| 5     | 5.180     | 30517 | 20932  | 32.449 |    |     |      |
| Total |           | 94045 | 65628  |        |    |     |      |

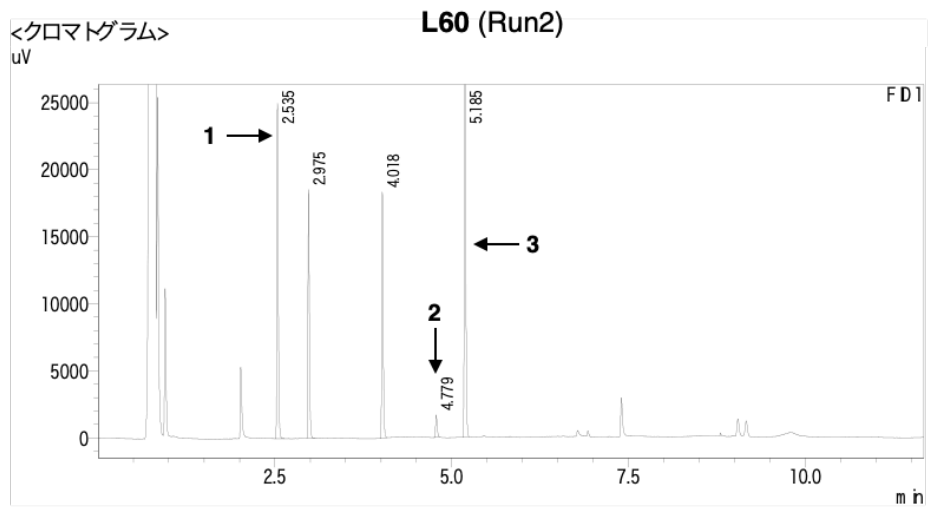

<ピークレポート>

| FD1   | Ret. Time | Area   | Height | 濃度     | 単位 | マーク | 化合物名 |
|-------|-----------|--------|--------|--------|----|-----|------|
| ピーク#  | 保持時間      | 面積     | 高さ     |        |    |     |      |
| 1     | 2.535     | 34134  | 23960  | 25.497 |    |     |      |
| 2     | 2.975     | 25269  | 18275  | 18.875 |    |     |      |
| 3     | 4.018     | 26068  | 18051  | 19.472 |    |     |      |
| 4     | 4.779     | 2469   | 1598   | 1.844  |    | M   |      |
| 5     | 5.185     | 45933  | 31909  | 34.311 |    |     |      |
| Total |           | 133873 | 93793  |        |    |     |      |

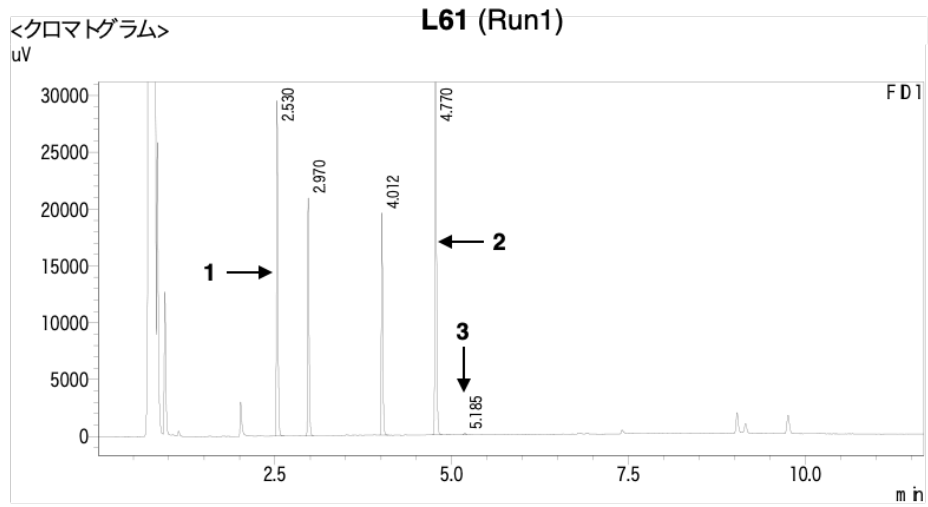

<ピークレポート>

| FD1   | Ret. Time | Area   | Height | 濃度     | 単位 | マ-ク | 化合物名 |
|-------|-----------|--------|--------|--------|----|-----|------|
| ピーク#  | 保持時間      | 面積     | 高さ     |        |    |     |      |
| 1     | 2.530     | 40018  | 28188  | 24.805 |    |     |      |
| 2     | 2.970     | 28399  | 20588  | 17.603 |    |     |      |
| 3     | 4.012     | 27532  | 19347  | 17.066 |    |     |      |
| 4     | 4.770     | 65184  | 43735  | 40.404 |    |     |      |
| 5     | 5.185     | 196    | 115    | 0.122  |    | M   |      |
| Total |           | 161329 | 111972 |        |    |     |      |

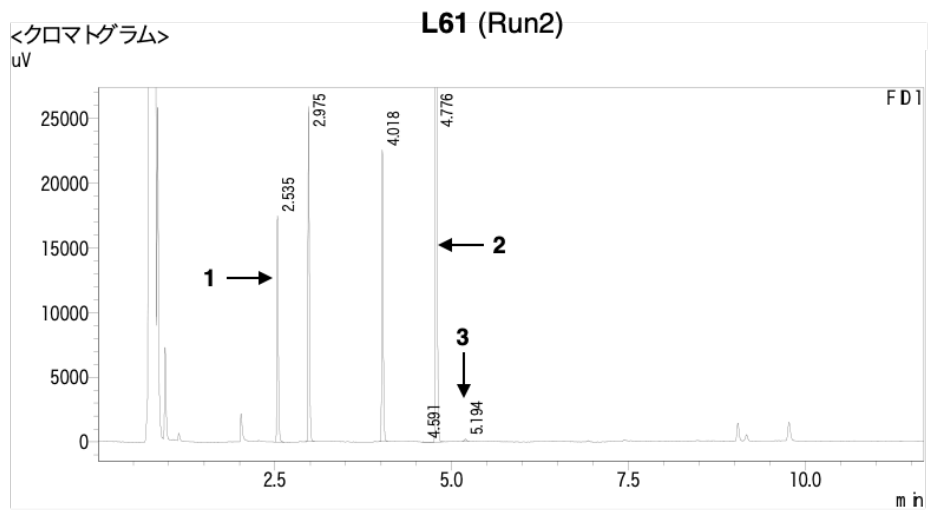

<ピークレポート>

| FD1   | Ret. Time | Area   | Height | 濃度     | 単位 | マ-ク | 化合物名 |
|-------|-----------|--------|--------|--------|----|-----|------|
| ピーク#  | 保持時間      | 面積     | 高さ     |        |    |     |      |
| 1     | 2.535     | 24001  | 16839  | 11.995 |    |     |      |
| 2     | 2.975     | 34900  | 25492  | 17.442 |    |     |      |
| 3     | 4.018     | 31764  | 22123  | 15.875 |    |     |      |
| 4     | 4.591     | 31     | 11     | 0.015  |    | M   |      |
| 5     | 4.776     | 109094 | 74490  | 54.523 |    |     |      |
| 6     | 5.194     | 297    | 152    | 0.148  |    | M   |      |
| Total |           | 200087 | 139106 |        |    |     |      |



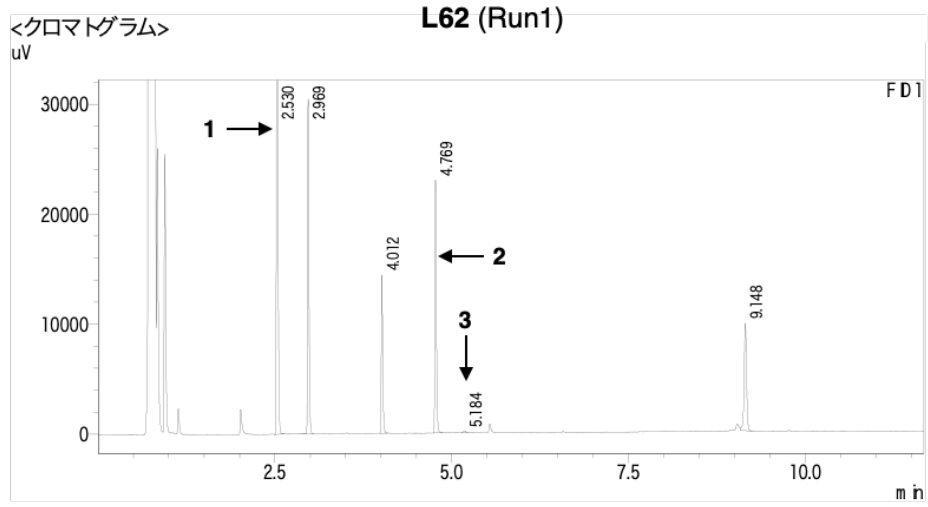

<ピークレポート>

| FD1  | Ret. Time | Area   | Height | 濃度     | 単位 | マーク | 化合物名 |
|------|-----------|--------|--------|--------|----|-----|------|
| ピーク# | 保持時間      | 面積     | 高さ     |        |    |     |      |
| 1    | 2.530     | 80104  | 57368  | 40.480 |    |     |      |
| 2    | 2.969     | 41129  | 29422  | 20.784 |    | V   |      |
| 3    | 4.012     | 20340  | 14242  | 10.279 |    |     |      |
| 4    | 4.769     | 33299  | 22511  | 16.827 |    |     |      |
| 5    | 5.184     | 276    | 126    | 0.140  |    | M   |      |
| 6    | 9.148     | 22737  | 9666   | 11.490 |    | V   |      |
| Tota |           | 197885 | 133336 |        |    |     |      |

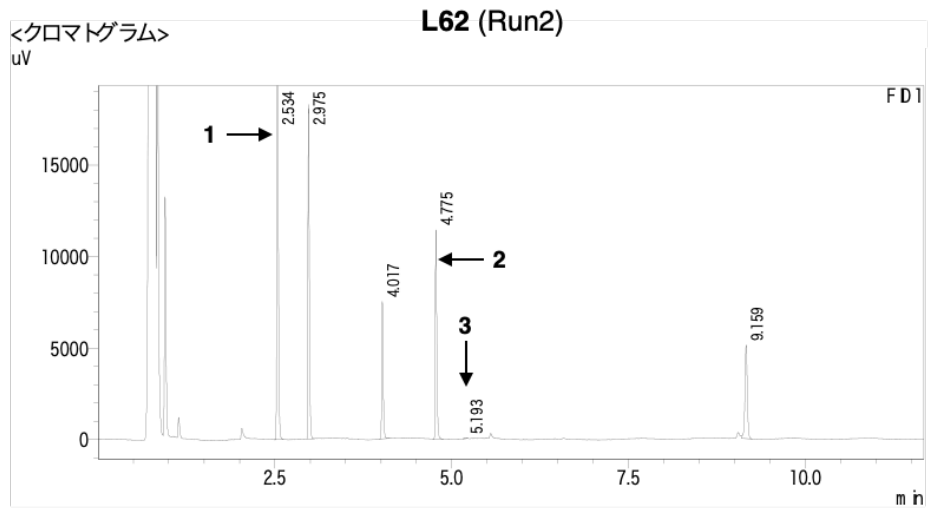

<ピークレポート>

| FD1  | Ret. Time | Area   | Height | 濃度     | 単位 | マーク | 化合物名 |
|------|-----------|--------|--------|--------|----|-----|------|
| ピーク# | 保持時間      | 面積     | 高さ     |        |    |     |      |
| 1    | 2.534     | 40967  | 28948  | 38.888 |    |     |      |
| 2    | 2.975     | 24751  | 17862  | 23.495 |    |     |      |
| 3    | 4.017     | 10831  | 7396   | 10.281 |    |     |      |
| 4    | 4.775     | 16963  | 11029  | 16.102 |    |     |      |
| 5    | 5.193     | 119    | 56     | 0.113  |    | M   |      |
| 6    | 9.159     | 11716  | 5089   | 11.121 |    | V   |      |
| Tota |           | 105348 | 70381  |        |    |     |      |

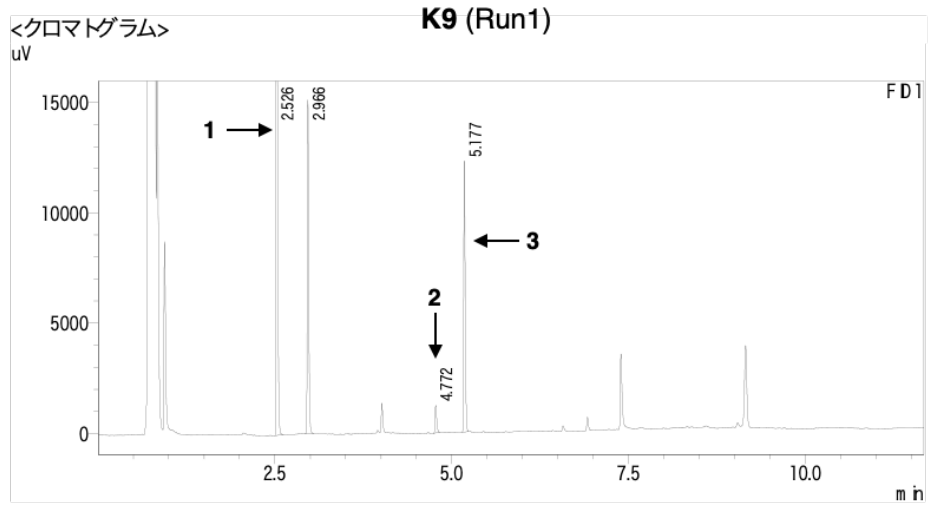

<ピークレポート>

| FD1   | Ret. Time | Area  | Height | 濃度     | 単位 | マーク | 化合物名 |
|-------|-----------|-------|--------|--------|----|-----|------|
| ピーク#  | 保持時間      | 面積    | 高さ     |        |    |     |      |
| 1     | 2.526     | 42892 | 30152  | 51.711 |    |     |      |
| 2     | 2.966     | 20629 | 14775  | 24.871 |    |     |      |
| 3     | 4.772     | 1973  | 1229   | 2.379  |    | M   |      |
| 4     | 5.177     | 17451 | 11910  | 21.039 |    |     |      |
| Total |           | 82945 | 58065  |        |    |     |      |

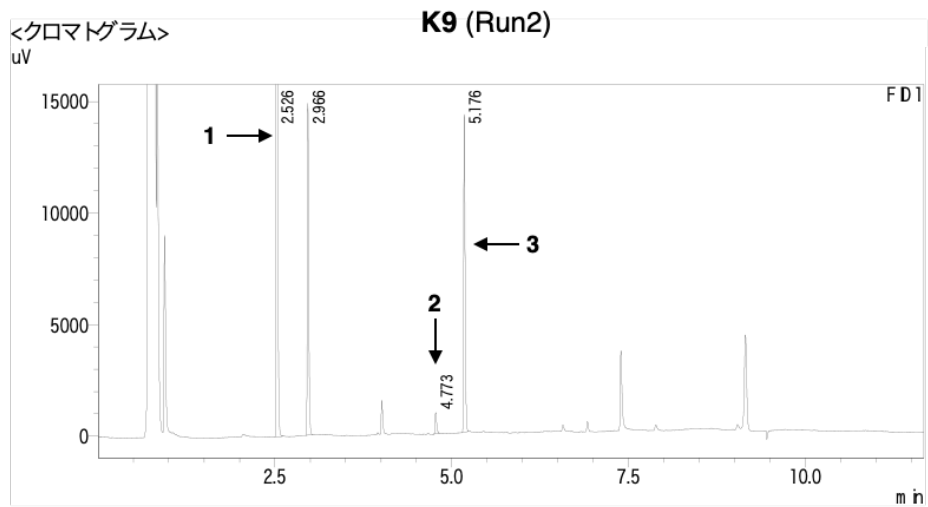

<ピークレポート>

| FD1   | Ret. Time | Area  | Height | 濃度     | 単位 | マーク | 化合物名 |
|-------|-----------|-------|--------|--------|----|-----|------|
| ピーク#  | 保持時間      | 面積    | 高さ     |        |    |     |      |
| 1     | 2.526     | 44761 | 31429  | 51.585 |    |     |      |
| 2     | 2.966     | 20299 | 14633  | 23.394 |    |     |      |
| 3     | 4.773     | 1478  | 934    | 1.703  |    | M   |      |
| 4     | 5.176     | 20234 | 13690  | 23.318 |    |     |      |
| Total |           | 86771 | 60687  |        |    |     |      |

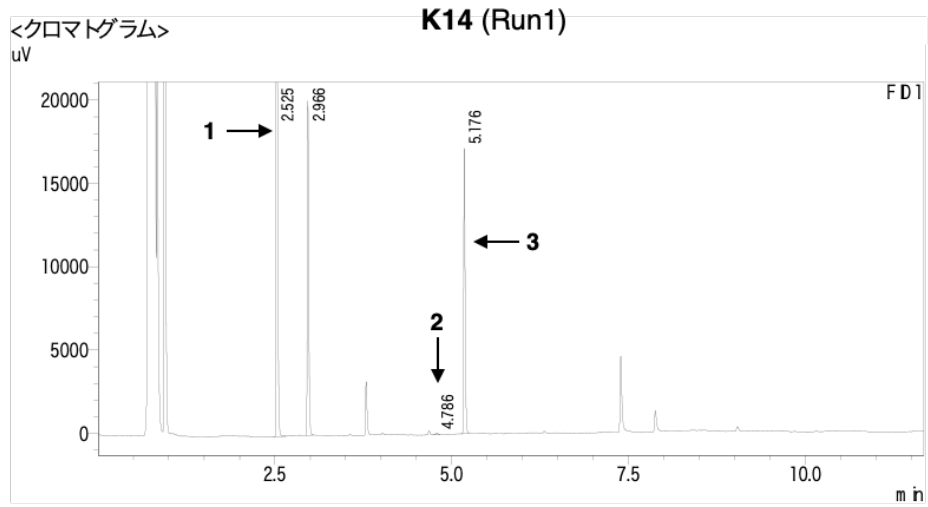

<ピークレポート>

| FD1  | Ret. Time | Area   | Height | 濃度     | 単位 | マ-ク | 化合物名 |
|------|-----------|--------|--------|--------|----|-----|------|
| ピーク# | 保持時間      | 面積     | 高さ     |        |    |     |      |
| 1    | 2.525     | 54970  | 38328  | 51.521 |    |     |      |
| 2    | 2.966     | 27453  | 19711  | 25.730 |    |     |      |
| 3    | 4.786     | 173    | 92     | 0.162  |    | M   |      |
| 4    | 5.176     | 24100  | 16439  | 22.587 |    |     |      |
| Tota |           | 106696 | 74570  |        |    |     |      |

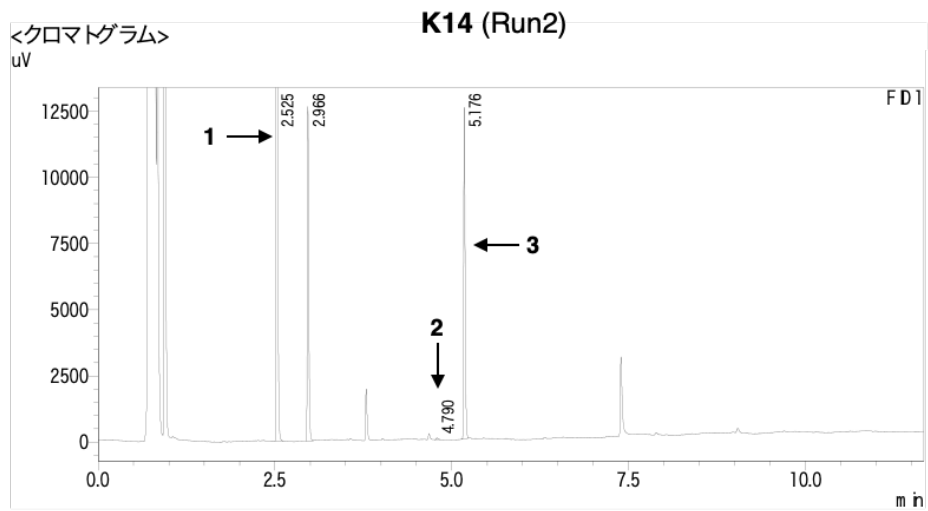

<ピークレポート>

| FD1  | Ret. Time | Area  | Height | 濃度     | 単位 | マ-ク | 化合物名 |
|------|-----------|-------|--------|--------|----|-----|------|
| ピーク# | 保持時間      | 面積    | 高さ     |        |    |     |      |
| 1    | 2.525     | 37459 | 26037  | 51.517 |    |     |      |
| 2    | 2.966     | 17362 | 12453  | 23.878 |    |     |      |
| 3    | 4.790     | 98    | 58     | 0.135  |    | M   |      |
| 4    | 5.176     | 17793 | 12010  | 24.470 |    |     |      |
| Tota |           | 72713 | 50557  |        |    |     |      |
